1 A *Francisella tularensis* L,D-carboxypeptidase plays important roles in cell morphology,  
2 envelope integrity, and virulence.

3

4

5 Briana Zellner<sup>1</sup>, Dominique Mengin-Lecreulx<sup>2</sup>, Brenden Tully<sup>1</sup>, William T. Gunning 3rd<sup>3</sup>,  
6 Robert Booth<sup>3</sup>, Jason F. Huntley<sup>1\*</sup>

7

8

9 <sup>1</sup>Department of Medical Microbiology and Immunology, University of Toledo, Toledo, OH,  
10 U.S.A.; <sup>2</sup> Institute for Integrative Biology of the Cell (I2BC), CEA, CNRS, Univ. Paris-Sud,  
11 Université Paris-Saclay, 91198 Gif-sur-Yvette, France; <sup>3</sup>Department of Pathology, University of  
12 Toledo, Toledo, OH, U.S.A.

13

14

15 Running Head: *F. tularensis* L,D-carboxypeptidase

16

17

18 To whom correspondence should be addressed: Jason F. Huntley, Department of Medical  
19 Microbiology and Immunology, University of Toledo College of Medicine and Life Sciences,  
20 3000 Arlington Ave., MS1021, HEB 200D, Toledo, OH, U.S.A., 43614. Tel.: 419-383-5456;  
21 Email: Jason.Huntley@UToledo.edu

22

23 **Summary**

24 *Francisella tularensis* is a Gram-negative, intracellular bacterium that causes the zoonotic disease  
25 tularemia. Intracellular pathogens, including *F. tularensis*, have evolved mechanisms to survive  
26 in the harsh environment of macrophages and neutrophils, where they are exposed to cell  
27 membrane-damaging molecules. The bacterial cell wall, primarily composed of peptidoglycan  
28 (PG), maintains cell morphology, structure, and membrane integrity. Intracellular Gram-negative  
29 bacteria protect themselves from macrophage and neutrophil killing by recycling and repairing  
30 damaged PG – a process that involves over 50 different PG synthesis and recycling enzymes.  
31 Here, we identified a PG recycling enzyme, L,D-carboxypeptidase A (LdcA), of *F. tularensis* that  
32 is responsible for converting PG tetrapeptide stems to tripeptide stems. Unlike *E. coli* LdcA and  
33 most other orthologs, *F. tularensis* LdcA does not localize to the cytoplasm and also exhibits L,D-  
34 endopeptidase activity, converting PG pentapeptide stems to tripeptide stems. Loss of *F.*  
35 *tularensis* LdcA led to altered cell morphology and membrane integrity, as well as attenuation in  
36 a mouse pulmonary infection model and in primary and immortalized macrophages. Finally, an  
37 *F. tularensis ldcA* mutant protected mice against virulent Type A *F. tularensis* SchuS4 pulmonary  
38 challenge.

39

40

41

42 **Keywords:** tularemia, peptidoglycan, L,D-carboxypeptidase, virulence, *Francisella*  
43 *tularensis*

44

45

46

## 47 **Introduction**

48           The Gram-negative bacterial cell wall plays an important role in maintaining cell shape,  
49 protecting against external insults, and preventing cell lysis amid fluctuations in internal turgor  
50 pressure (Dhar, 2018). The cell wall is composed of peptidoglycan (PG), a network of alternating  
51 *N*-acetylglucosamine (GlcNAc) and *N*-acetylmuramic acid (MurNAc) glycan chains that are  
52 crosslinked through peptide stems, and lies just outside of the cytoplasmic membrane of most  
53 bacteria (Johnson, 2013; Mengin-Lecreux & Lemaitre, 2005). In *Escherichia coli*, PG has been  
54 shown to be covalently attached to the outer membrane (OM) by Braun's lipoprotein and  
55 noncovalently attached by Pal and other lipoproteins (Bouveret, 1999; Braun, 1975; Braun, 1969;  
56 Leduc, 1992). A loss of membrane integrity can occur if interactions between PG and attached  
57 lipoproteins are disturbed, thus maintenance of correct PG architecture is extremely important  
58 (Braun & Hantke, 2019; Braun & Rehn, 1969).

59           Synthesis of Gram-negative PG precursors, studied mainly in *E. coli*, occurs in the bacterial  
60 cytoplasm and requires a series of enzymes to build a pentapeptide PG monomer before  
61 transporting this molecule into the periplasm. Periplasmic PG cross-linking most often occurs  
62 between the fourth residue (D-Ala) of newly-formed pentapeptide stems to the third residue (*meso*-  
63 A<sub>2</sub>pm) of existing tripeptide stems (4-3 cross links), resulting in the release of the pentapeptide  
64 terminal D-Ala and forming tetrapeptide stems (Glauner, 1988; Pazos & Peters, 2019). PG is not  
65 a static structure, rather, PG degradation/remodeling is necessary to incorporate new PG and  
66 expand the cell wall during bacterial growth and replication, to insert flagella or secretion systems,  
67 and to septate during bacterial division (Scheurwater, 2008). Up to 60% of PG is recycled per  
68 generation, helping to repair damaged PG and providing energy during periods of stress or  
69 starvation (Dhar, 2018; Holtje, 1998; Park, 2008). Using *E. coli* as a model, more than 50 different  
70 PG synthesis and hydrolysis/recycling enzymes have been identified, most of which appear to be

71 cytoplasmic. While deletion studies in *E. coli* have indicated that some PG synthesis enzymes are  
72 essential, few PG hydrolases have been found to be essential and, in fact, substantial redundancy  
73 in hydrolase activity appears to exist. Indeed, alterations in cell morphology, membrane integrity,  
74 and ability to replicate/divide sometimes are observed only after multiple PG metabolism genes  
75 have been deleted (Dhar, 2018; van Heijenoort, 2011; Vollmer & Bertsche, 2008). Given the  
76 increasing threat of antimicrobial-resistant organisms and link between PG homeostasis and  
77 bacterial virulence, more studies are needed to understand how a diverse range of Gram-negative  
78 bacteria synthesize and recycle PG (Juan, 2018). As proof that PG studies can reveal new  
79 information about bacterial pathogenesis and new treatment options, an *Acinetobacter baumannii*  
80 penicillin-binding protein (PBP) mutant was reported to be more sensitive to complement-  
81 mediated killing than wild-type bacteria (Russo, 2009) and a *Helicobacter pylori* PG hydrolase  
82 (AmiA) mutant was unable to colonize mouse stomachs (Chaput, 2016).

83 PG recycling, mainly characterized in *E. coli*, begins with periplasmic lytic  
84 transglycosylase (LT) cleavage of the  $\beta$ -1,4-glycosidic linkage between MurNAc and GlcNAc,  
85 forming a GlcNAc-1,6-anhydro-MurNAc product, which allows for insertion of new mucopeptides  
86 and recycling of the GlcNAc-1,6-anhydro-MurNAc peptide (Scheurwater, 2008). Low molecular  
87 mass penicillin binding proteins (LMM PBPs) can function as endopeptidases, cleaving the cross-  
88 links between adjacent tetrapeptide stems, and/or as D,D-carboxypeptidases, removing the  
89 terminal D-Ala of pentapeptides during transpeptidation (cross-linking) reactions, forming the  
90 tetrapeptide (Dhar, 2018). Inner membrane permeases, such as AmpG, then transfer GlcNAc-1,6-  
91 anhydro-MurNAc disaccharides, with or without attached peptides, to the cytoplasm where they  
92 can be disassembled. Cytoplasmic NagZ and AmpD further degrade disaccharides by cleaving  
93 the bond between GlcNAc and 1,6-anhydro-MurNAc, and separating the peptide chain from 1,6-  
94 anhydro-MurNAc, respectively. Additional cytoplasmic hydrolases, such as L,D-

95 carboxypeptidases (Ldc), act on free peptide chains to cleave the terminal D-Ala from  
96 tetrapeptides, resulting in tripeptides (Dhar, 2018). PG is unusual in that it is both highly dynamic  
97 (e.g., allowing for bacterial division and molecular transport across the periplasm), yet tightly  
98 regulated to prevent membrane collapse and bacterial death. As such, PG recycling enzymes have  
99 been speculated to be important virulence determinants in Gram-negative bacteria (Juan, 2018).  
100 Indeed, *E.coli ldc* mutants lyse in stationary phase (Templin, 1999) and are more susceptible to  $\beta$ -  
101 lactam antibiotics (Ursinus, 1992), *Helicobacter* and *Campylobacter ldc* mutants have altered cell  
102 morphology and defects in motility and biofilm formation (Firdich, 2012; 2014; Sycuro, 2013),  
103 and *Neisseria gonorrhoeae ldc* mutants are unable to stimulate NOD1-dependent responses in the  
104 host (Lenz, 2017). However, very little is known about the importance of PG recycling enzymes  
105 in the pathogenesis of intracellular pathogens such as *Francisella tularensis*.

106 *F. tularensis*, the causative agent of tularemia, is a Gram-negative, intracellular,  
107 coccobacillus that can infect and cause lethal disease in many species, including humans (Dennis,  
108 2001; Keim, 2007). There are three subspecies of *F. tularensis*, subsp. *tularensis* (Type A), subsp.  
109 *holarctica* (Type B), and subsp. *mediasiatica*, although only subsp. *tularensis* and subsp.  
110 *holarctica* are virulent for humans (Kingry, 2014). *F. tularensis* poses a severe threat to public  
111 health and has been classified as an NIH Category A Priority Pathogen and a CDC Tier 1 Select  
112 Agent due to its low infectious dose (<10 CFU), ease of aerosolization, and high morbidity and  
113 mortality rates (up to 60%) (Ellis, 2002; Sjostedt, 2007). Like other intracellular pathogens, *F.*  
114 *tularensis* has evolved different mechanisms to infect, survive, and replicate within host cells,  
115 including macrophages and neutrophils (Ray, 2009). However, this lifestyle exposes the bacteria  
116 to reactive oxygen species (ROS), reactive nitrogen species (RNS), antimicrobial peptides, and  
117 other cell membrane- and cell wall-damaging molecules (Jones, 2012). Our group previously  
118 demonstrated that the *F. tularensis* disulfide bond formation protein A (DsbA) ortholog repairs

119 damaged outer membrane proteins and known virulence factors. We additionally showed that *F.*  
120 *tularensis* DsbA, unlike periplasmic DsbA in *E. coli* and most other Gram-negative bacteria, is  
121 outer membrane-bound and is a multifunctional protein with both oxidoreductase and isomerase  
122 activities. Finally, using a molecular trapping approach, we identified over 50 *F. tularensis* DsbA  
123 substrates, many of which we speculate are involved in virulence (Ren, 2014).

124 Here, we determined the function of one of those *F. tularensis* DsbA substrates – a  
125 previously unstudied hypothetical protein containing a putative LdcA domain – and assessed its  
126 role in bacterial virulence. Deletion of *F. tularensis* LdcA resulted in bacteria with altered cell  
127 morphology, increased sensitivity to  $\beta$ -lactam antibiotics, yet increased resistance to several  
128 stressors (e.g., H<sub>2</sub>O<sub>2</sub>, NaCl, low pH). Next, we demonstrated that *F. tularensis* LdcA exhibits L,D-  
129 carboxypeptidase and L,D-endopeptidase activities on pentapeptide and tetrapeptide residues of  
130 PG. Finally, we established that *F. tularensis* LdcA is required for virulence, as mutants were  
131 unable to replicate in macrophages or cause disease in mice.

132

## 133 **Results**

### 134 *FTL1678 contains a putative L,D-carboxypeptidase domain*

135 Previous studies by our group and others have shown that *F. tularensis* DsbA mutants are  
136 attenuated in mice (Qin, 2009; Ren, 2014). However, additional work by our group, demonstrating  
137 that DsbA possesses both oxidoreductase and isomerase activities to repair damaged envelope and  
138 cell membrane proteins, indicated that other envelope proteins likely are responsible for *F.*  
139 *tularensis* virulence (Ren, 2014). To identify new *F. tularensis* virulence factors, we used a  
140 molecular trapping approach and identified over 50 *F. tularensis* DsbA substrates (Ren, 2014).  
141 One of those DsbA substrates, FTL1678, is annotated in the *F. tularensis* genome as a conserved  
142 membrane hypothetical protein. Here, a conserved domain search revealed that a large portion of

143 FTL1678 contains a putative Ldc domain, part of the peptidase\_S66 superfamily (Figure S1). Ldc  
144 proteins have been studied in a number of Gram-negative bacteria, including *E. coli* (Metz, 1986a;  
145 b; Templin, 1999; Ursinus, 1992), *Pseudomonas aeruginosa* (Korza, 2005), *N. gonorrhoeae* (Lenz,  
146 2017), and *Campylobacter jejuni* (Firdich, 2014). To further explore this conserved domain,  
147 amino acid sequences of FTL1678 (*F. tularensis* subsp. *holarctica* [Type B] LVS) and FTT0101  
148 (homolog of FTL1678 in *F. tularensis* subsp. *tularensis* [Type A] SchuS4) were aligned with LdcA  
149 orthologs from *E. coli*, *P. aeruginosa*, *N. gonorrhoeae*, and *C. jejuni* (named Pgp2). Despite low  
150 percentages of amino acid identities among the LdcA orthologs (6.3% to 30.3%; Figure 1), there  
151 was a higher degree of amino acid similarity among LdcA orthologs (13.0% [*E. coli* and *C. jejuni*]  
152 to 44.7% [*E. coli* and *N. gonorrhoeae*]; Figure 1). Notably, the LdcA Ser-Glu-His catalytic triad,  
153 previously shown to be required for *P. aeruginosa* LdcA activity (Korza, 2005), was absent from  
154 *C. jejuni* Pgp2 but was present in all LdcA homologs, including FTL1678 and FTT0101 (Figure  
155 1).

156 *E. coli* and *P. aeruginosa* Ldcs have been localized to the bacterial cytoplasm (Korza, 2005;  
157 Templin, 1999). However, *C. jejuni* Pgp2 is unusual in that it contains a signal peptide and has  
158 been speculated to be periplasmic (Firdich, 2014). In addition, *N. gonorrhoeae* LdcA was found  
159 to be periplasmic and outer membrane-associated (Lenz, 2017). As noted above, we previously  
160 demonstrated that FTL1678 is a DsbA substrate (Ren, 2014), indicating that FTL1678 is located  
161 in the *F. tularensis* envelope (*i.e.*, in the inner membrane [IM], periplasm, or outer membrane  
162 [OM]). Bioinformatic analyses of FTL1678 indicated that it is a periplasmic protein due to the  
163 presence of a signal peptide but absence of OM or lipoprotein signatures (Table S1). To  
164 experimentally confirm FTL1678 localization, we generated an *F. tularensis* strain with 6×  
165 histidine-tagged FTL1678, then performed spheroplasting, osmotic lysis, and sucrose density  
166 gradient centrifugation to separate IM and OM fractions and probe for protein subcellular

167 localization. Immunoblotting of whole-cell lysates (WCL), OM fractions, and IM fractions  
168 demonstrated that the OM control protein, FopA (Huntley, 2007), only was present in WCL and  
169 OM fractions (but not IM fractions; Figure 2) and the IM control protein, SecY (Huntley, 2007),  
170 only was present in WCL and IM fractions (but not OM fractions; Figure 2). By comparison,  
171 FTL1678 only was detected in WCL and OM fractions, demonstrating OM-association (Figure 2).  
172 As noted above, because *N. nonorrhoeae* LdcA was found to fractionate to both the OM and  
173 soluble fractions (indicating periplasmic localization) (Lenz, 2017), we next examined the  
174 localization of *F. tularensis* periplasmic proteins in our fractions to better understand FTL1678  
175 localization. TolB is a well-known periplasmic protein in Gram-negative bacteria and binds to PG  
176 with the peptidoglycan associated lipoprotein, Pal (Clavel, 1998; Walburger, 2002). We  
177 previously demonstrated that the *F. tularensis* Pal homolog is OM-localized (Huntley, 2007),  
178 similar to its OM-localization in other Gram-negative bacteria. Here, the *F. tularensis* TolB  
179 homolog was detected in OM fractions, but not IM fractions (Figure S2), demonstrating that some  
180 *F. tularensis* periplasmic proteins fractionate with OMs. Additional fractionation and periplasmic  
181 protein localization (Jones et al, 2016) experiments were performed but specific localization of  
182 FTL1678 to the periplasm could not be confirmed (data not shown). Regardless, data that  
183 FTL1678 is a DsbA substrate (*i.e.*, FTL1678 is an envelope protein)(Ren, 2014), FTL1678  
184 contains a signal peptidase I cleavage site (Table S1), FTL1678 does not contain membrane protein  
185 signatures (Table S1), and FTL1678 is OM-associated (Figure 2), provides strong evidence that  
186 FTL1678 is not a cytoplasmic protein, unlike *E. coli* LdcA. Instead, our data indicate that, similar  
187 to *N. nonorrhoeae* LdcA, FTL1678 may be a periplasmic protein.

188

189

190



191 *FTL1678 exhibits L,D-carboxypeptidase and L,D-endopeptidase activities*

192 To confirm the predicted Ldc activity of FTL1678 and FTT0101, recombinant FTL1678  
193 and FTT0101 were expressed and affinity purified from *E. coli*. As a control, lysates from *E. coli*  
194 containing the empty vector (pPROEX HTb) also were affinity-purified. Recombinant FTL1678,  
195 lysate from the vector control, or buffer alone were incubated with various PG precursors and PG  
196 intermediates (Table 1) to determine substrate specificity and specific activity. The vector control  
197 and buffer alone did not demonstrate activity against any of the PG substrates (data not shown).  
198 When FTL1678 was incubated with various PG substrates, the highest specific activity was  
199 detected against the tetrapeptide substrates GlcNAc-anhydroMurNAc-L-Ala- $\gamma$ -D-Glu-*meso*-  
200 A<sub>2</sub>pm-D-Ala (tracheal cytotoxin; TCT; 21.5 nmol/min/mg of protein) and GlcNAc-MurNAc-L-  
201 Ala- $\gamma$ -D-Glu-*meso*-A<sub>2</sub>pm-D-Ala (reducing PG monomer; 15.6 nmol/min/mg of protein),  
202 confirming that FTL1678 exhibits L,D-carboxypeptidase activity (Table 1). Interestingly,  
203 FTL1678 activity against free tetrapeptide, L-Ala- $\gamma$ -D-Glu-*meso*-A<sub>2</sub>pm-D-Ala, was approx. 6-fold  
204 lower (3.4 nmol/min/mg of protein) than TCT and 5-fold lower than the reducing PG monomer  
205 (Table 1), indicating that GlcNAc and MurNAc may be important for tetrapeptide recognition or  
206 FTL1678 binding. Importantly, FTL1678 exhibited specific activity against pentapeptide  
207 substrates MurNAc-L-Ala- $\gamma$ -D-Glu-*meso*-A<sub>2</sub>pm-D-Ala-D-Ala (9.8 nmol/min/mg of protein;  
208 Table 1) and UDP-MurNAc-L-Ala- $\gamma$ -D-Glu-*meso*-A<sub>2</sub>pm-D-Ala-D-Ala (5.9 nmol/min/mg of  
209 protein; Table 1), indicating that FTL1678 also functions as an L,D-endopeptidase (cleavage of  
210 the pentapeptide between *meso*-A<sub>2</sub>pm and D-Ala) by FTL1678.

211 To further investigate the endopeptidase activity of FTL1678, FTL1678 was incubated  
212 with various TCT monomer and dimer substrates, containing different peptide lengths and cross-  
213 link locations (Table S2). Although FTL1678 exhibited the highest specific activity against TCT  
214 monomers containing tetrapeptide stems with either an Alanine or a Glycine in the fourth position

215 (20 nmol/min/mg and 18 nmol/min/mg of protein, respectively), FTL1678 also was able to cleave  
216 all four variations of the TCT dimer (two cross-linked TCT monomers), demonstrating  
217 endopeptidase activity (Table S2). Of the four different TCT dimers tested, FTL1678 was most  
218 active on TCT dimers connected by a 4-3 cross linkage (6.6 nmol/min/mg of protein), followed by  
219 an approx. 24-fold reduction in activity on 3-3 cross links connecting two tripeptides (0.28  
220 nmol/min/mg of protein), a tripeptide and tetrapeptide with a Glycine at the fourth position (0.21  
221 nmol/min/mg of protein), and a tripeptide and tetrapeptide with an Alanine at the fourth position  
222 (0.16 nmol/min/mg of protein) (Table S2). These data suggest that, while FTL1678 exhibits  
223 endopeptidase activity on 4-3 and 3-3 cross-links, cleavage of 3-3 cross links is likely not its main  
224 physiological function.

225 Finally, FTL1678 had negligible activity against L-lysine-containing substrates (0.7 to 1.3  
226 nmol/min/mg of protein; Table 1), where L-lysine replaced *meso*-A<sub>2</sub>pm at the third amino acid  
227 position, indicating the importance of *meso*-A<sub>2</sub>pm. Assays were repeated with recombinant  
228 FTT0101 (SchuS4 homolog) and, due to 99.4% amino acid identify with FTL1678, FTT0101  
229 demonstrated similar tetrapeptide cleavage activity (*i.e.*, LdcA activity) as FTL1678 (Table 1).  
230 FTT0101 also was not active on a peptidoglycan polymer and had either no or negligible activity  
231 on PG monomers that were amidated at the *meso*-A<sub>2</sub>pm or D-Glu residues (Table 1). Additionally,  
232 FTT0101 was not inhibited by 5 mM EDTA and did not require the presence of cations (Mg<sup>2+</sup>) for  
233 tetrapeptide cleavage (data not shown).

234

### 235 *FTL1678 controls bacterial morphology*

236 LdcA has been shown to be important for maintenance of bacterial morphology and  
237 structural integrity (Firdich, 2014; Sycuro, 2013). In addition, mutations/deletions or  
238 combinations of mutations/deletions in PG-modifying proteins can result in abnormal bacterial

239 morphology, emphasizing the importance of PG modification and recycling (Guinane, 2006;  
240 Heidrich, 2001; Juan, 2018; Nelson, 2000; Priyadarshini, 2007; Sycuro, 2010). To assess if  
241 FTL1678 plays a similar role in *F. tularensis*, we generated an isogenic deletion of *FTL1678*,  
242 referred to hereafter as  $\Delta FTL1678$ , in *F. tularensis* LVS. When examined by transmission electron  
243 microscopy (TEM), wild-type (WT) bacterial width ranged from 350 to 800 nm (Figures 3A and  
244 3D), whereas  $\Delta FTL1678$  bacteria were more uniform in cell width, averaging approx. 350 nm  
245 (Figures 3B and 3D). WT bacteria were observed to be coccobacilli with loosely-associated OM  
246 (Figure 3A), while  $\Delta FTL1678$  bacteria were found to be more coccoid in appearance, the OM was  
247 tightly-associated, and three prominent structures were present around the periphery of each  
248 bacterium, likely the OM, PG, and IM (Figure 3B). Additionally,  $\Delta FTL1678$  bacteria appeared  
249 more electron dense and had a significantly-thicker OM than WT bacteria (Figures 3A, 3B, and  
250 3C).

251 Previous studies have shown that deletion of genes for PG-modifying proteins (*e.g.*, murein  
252 hydrolases) can result in abnormal growth characteristics, including lysis during stationary phase  
253 (Templin, 1999) and an inability to separate daughter cells at the septa during cell division,  
254 resulting in abnormal bacterial chains (Chaput, 2016; Denome, 1999; Heidrich, 2001; 2002; Juan,  
255 2018; Priyadarshini, 2007; 2006). Although *N*-acetylmuramyl-L-alanine amidases have been  
256 shown to be predominantly involved in the cleavage of bacterial septa, deletion of lytic  
257 transglycosylases and some endopeptidases, in combination with amidase deletions, also have  
258 resulted in abnormal bacterial chains (Heidrich, 2001; 2002). To examine any potential replication  
259 defects of  $\Delta FTL1678$ , we compared both OD<sub>600</sub> values (Figure S3A) and CFUs over time (Figure  
260 S3B) of WT and  $\Delta FTL1678$  in supplemented Mueller Hinton Broth (sMHB; standard growth  
261 medium for *F. tularensis*; (Huntley, 2007)), finding that  $\Delta FTL1678$  did not have any inherent  
262 growth defects. When examining both WT and  $\Delta FTL1678$  by TEM for any septation defects or

263 abnormal bacterial chains, approximately 10% of  $\Delta FTL1678$  bacteria grew in chains of three to  
264 four bacteria (Figure S4A and S4B), whereas no WT bacteria exhibited this septation defect (data  
265 not shown). Taken together, our findings that  $\Delta FTL1678$  is 1.5- to 2-times smaller than WT  
266 (Figure 3D),  $\Delta FTL1678$  is more coccoid in shape (Fig 3B),  $\Delta FTL1678$  has a pronounced three-  
267 layered envelope, including a prominent electron dense layer between the IM and OM (likely PG;  
268 Figure 3B), and  $\Delta FTL1678$  has a partial septum defect (Figure S4), further support the role of  
269 FTL1678 as a PG-modifying enzyme that is important for bacterial elongation and division.

270

### 271 *Deletion of FTL1678 affects antibiotic, detergent, and stressor sensitivity*

272 Given the above noted morphological differences in the  $\Delta FTL1678$  envelope (*e.g.*, thicker  
273 OM; tightly-associated OM; three prominent envelope structures) using TEM, we assessed  
274 envelope (*i.e.*, IM, PG, and OM) integrity by growing both WT and  $\Delta FTL1678$  bacteria in the  
275 presence of various antibiotics, detergents, and dyes, and measuring zones of inhibition after 48 h  
276 of growth (Table 2).  $\Delta FTL1678$  was found to be more susceptible than WT to ampicillin,  
277 vancomycin, lysozyme, and SDS (Table 2), indicating potential changes to PG (ampicillin  
278 sensitivity), OM integrity (vancomycin and lysozyme sensitivity), or efflux pumps (SDS  
279 sensitivity). Conversely,  $\Delta FTL1678$  was found to be more resistant than WT to gentamicin,  
280 tetracycline, chloramphenicol, ciprofloxacin, ethidium bromide, and Triton X-100 (Table 2).  
281 Given that the majority of these latter reagents must enter the cytoplasm to exert their inhibitory  
282 effects (*i.e.*, gentamicin, tetracycline, and chloramphenicol inhibit protein synthesis; ciprofloxacin  
283 and ethidium bromide interfere with DNA replication), these results suggest that  $\Delta FTL1678$   
284 bacteria exclude these inhibitory molecules from entering the cytoplasm.

285 To better understand potential differences in the  $\Delta FTL1678$  envelope, WT and  $\Delta FTL1678$   
286 were grown in either sMHB at 37°C or in sMHB with various stress conditions. In sMHB at 37°C,

287  $\Delta FTL1678$  did not exhibit a growth defect but, instead, appeared to grow to a higher optical density  
288 ( $OD_{600}$ ) than WT (Figure 4A). However, as noted above, despite higher  $OD_{600}$  measurements for  
289  $\Delta FTL1678$  at several time points, bacterial numbers were not significantly different between WT  
290 and  $\Delta FTL1678$  (Figure S3). Although speculative, the disassociation between  $\Delta FTL1678$  optical  
291 densities and bacterial numbers may be due to the observed TEM morphological differences of  
292  $\Delta FTL1678$  (Figure 3 and Figure S4). Compared with growth in sMHB at 37°C, no substantial  
293 differences in the growth rates of WT and  $\Delta FTL1678$  were observed at either 40°C or in the  
294 presence of 60  $\mu\text{M}$   $\text{CuCl}_2$  (Figure 4B and 4C). However,  $\Delta FTL1678$  grew considerably better than  
295 WT in the presence of 5 mM  $\text{H}_2\text{O}_2$ , 5% NaCl, and pH 5.5 (Figure 4D, 4E, and 4F, respectively),  
296 providing further evidence of modifications to the  $\Delta FTL1678$  envelope. Although many  
297 mechanisms can account for increased resistance to  $\text{H}_2\text{O}_2$ , high NaCl, and low pH, the combined  
298 results from these antibiotic, detergent, and stressor sensitivity/resistance assays suggest that  
299  $\Delta FTL1678$  bacteria may have decreased OM integrity, altered PG, altered activity of efflux pumps,  
300 and a less permeable IM. Indeed, decreased permeability of the IM and altered activity of IM  
301 efflux pumps may help explain the more electron-dense staining of  $\Delta FTL1678$ , compared to WT  
302 (Figure 3).

303

304  *$\Delta FTL1678$  is fully-attenuated in a mouse pulmonary infection model*

305 To examine if FTL1678 plays a role in *F. tularensis* virulence, mice were intranasally  
306 infected with  $10^4$  CFU of either WT or  $\Delta FTL1678$  and monitored daily for signs of disease.  
307 Whereas all WT-infected mice died by day 9 post-infection (median time-to-death day 6),  
308  $\Delta FTL1678$  was completely attenuated (100% survival through day 21 post-infection),  
309 demonstrating that FTL1678 is required for *F. tularensis* virulence (Figure 5A). To confirm that  
310 the observed attenuation was solely due to the deletion of *FTL1678*, and not to polar effects, we

311 complemented  $\Delta FTL1678$  with a 6 $\times$  His-tagged FTL1678 *in trans*, which fully-restored virulence  
312 to WT levels (all mice died by day 7; median time-to-death day 6; Figure 5A).

313 To more carefully assess  $\Delta FTL1678$  attenuation *in vivo*, we intranasally-infected mice with  
314  $10^4$  CFU of either WT LVS or  $\Delta FTL1678$ , and enumerated bacterial CFUs from lungs, livers,  
315 spleens, and blood on days 2 and 5 post-infection to examine bacterial replication and  
316 dissemination to these organs/tissues over time. On day 2 post-infection, WT LVS replicated to  
317  $>10^7$  CFU/mg lung and had disseminated to livers, spleens (approx.  $10^3$  CFU/mg), and blood ( $10^3$   
318 CFU/ml; Figure 5B). In contrast,  $\Delta FTL1678$  had an initial (day 2) colonization defect in the lungs  
319 (4-logs less than WT) and was unable to disseminate to livers, spleens, or blood (Figure 5B). By  
320 day 5 post-infection, the attenuation of  $\Delta FTL1678$  was even more apparent, with WT LVS  
321 replicating to extremely high numbers (approx.  $10^8$  CFU/mg) in lungs, livers, and spleens,  
322 compared with  $\Delta FTL1678$ , which replicated approx. 1-log in lungs (between day 2 and 5), but was  
323 4-log attenuated in lungs and was not detectable in livers or spleens (Figure 5B). Although  
324  $\Delta FTL1678$  was detected in the blood on day 5, it was 2-logs less than WT LVS (Figure 5B).

325 The Type A *F. tularensis* strain SchuS4 originally was isolated from a human tularemia  
326 patient and requires BSL3 containment. Given its relevance to human disease, we next generated  
327 an isogenic deletion mutant of the *FTL1678* homolog, *FTT0101*, in SchuS4. When mice were  
328 intranasally-infected with either WT SchuS4 or  $\Delta FTT0101$ , all mice died by day 7 post-infection,  
329 indicating that *FTT0101* is not required for SchuS4 virulence (Figure S5). Whereas  $\Delta FTT0101$ -  
330 infected mice exhibited a slightly delayed time-to-death (median time-to-death day 6; Figure S5),  
331 compared with WT SchuS4-infected mice (median time-to-death day 5; Figure S5), this may be  
332 due to differences in the infectious dose administered to mice in this experiment (80 CFU SchuS4;  
333 12 CFU  $\Delta FTT0101$ ). However, it also remains possible that the extreme virulence of SchuS4  
334 (intranasal LD<sub>50</sub>  $<10$  CFU in our hands) complicates assessments of mutant attenuation *in vivo*.

335 To further assess  $\Delta FTT0101$ , the susceptibilities of  $\Delta FTT0101$  and WT SchuS4 to various  
336 antibiotics, detergents, and dyes were compared, with no significant differences observed (Table  
337 S3). At this time, we cannot fully explain why the *F. tularensis* Type B LdcA mutant  $\Delta FTL1678$   
338 is fully-attenuated in mice (Figure 5) and displays altered sensitivity/resistance to antibiotics,  
339 detergents, and dyes (Table 2), while the *F. tularensis* Type A LdcA mutant  $\Delta FTT0101$  retains  
340 virulence in mice (Figure S5) and does not demonstrate altered sensitivity/resistance to antibiotics,  
341 detergents, and dyes (compared to WT SchuS4; Table S3). However, this finding is not  
342 unexpected given genomic studies indicating that, despite >97% nucleotide identity between Type  
343 A and Type B *F. tularensis*, there are over 100 genomic rearrangements between Type A and Type  
344 B and each subspecies encodes over 100 unique genes that likely influence known differences in  
345 Type A and Type B virulence (Petrosino et al, 2006).

346

#### 347 *Putative FTL1678 catalytic triad and Ldc activity are required for F. tularensis virulence*

348 As noted above and highlighted in Figure 1, *P. aeruginosa* LdcA contains a Ser-Glu-His  
349 catalytic triad which is essential for function and is characteristic of Ldc in the Peptidase\_S66  
350 family (Korza, 2005). The Ser-Glu-His catalytic triad also has been confirmed in Ldc from *E. coli*  
351 (Meyer, 2018), *Novosphingobium aromaticivorans* (Das, 2013), and *N. gonorrhoeae* (Lenz, 2017).  
352 Given the relatively conserved spacing of Ser134-Glu239-His308 residues in FTL1678 (Figure 1),  
353 we tested if these residues were required for *F. tularensis* virulence (similar to Figure 5A virulence  
354 assessments for  $\Delta FTL1678$  and the FTL1678 complemented strain). Site-directed mutagenesis  
355 was performed to independently generate FTL1678 complementation constructs containing either  
356 S134A, E239A, or H308A mutations. Next,  $\Delta FTL1678$  was complemented *in-trans* with each of  
357 these FTL1678 catalytic triad point mutants, and mice were intranasally infected with either WT,  
358  $\Delta FTL1678$ ,  $\Delta FTL1678$  *trans*-complemented with *FTL1678*, or  $\Delta FTL1678$  *trans*-complemented

359 with one of the FTL1678 catalytic triad point mutants (referred to hereafter as S134A, E239A, and  
360 H308A). Confirming our previous findings,  $\Delta FTL1678$  was completely attenuated (100% survival  
361 through day 21), while complementation of  $\Delta FTL1678$  with either FTL1678 (all mice dead by day  
362 8), S134A (all mice dead by day 7), E239A (all mice dead by day 8), or H308A (all mice dead by  
363 day 8), fully-restored virulence to WT LVS levels (all mice dead by day 10; Figure S6). These  
364 results indicated that although a putative Ser-Glu-His catalytic triad is present in FTL1678,  
365 mutation of individual residues does not affect *F. tularensis* virulence *in vivo*.

366         Given the complexity of *in vivo* animal infections and the possibility that single mutations  
367 in the putative Ser134-Glu239-His308 catalytic triad may not be sufficient to abolish enzyme  
368 function or alter bacterial virulence, we next assessed if mutations of two or three residues in the  
369 putative catalytic triad affected *in vitro* enzyme activity. Recombinant FTL1678 mutant proteins  
370 were generated and purified, each containing either two amino acid mutations (S134A/E239A,  
371 S134A/H308A, and E239A/H308A) or three amino acid mutations (S134A/E239A/H308A).  
372 Similar to what is described above, enzymatic assays were performed, using the TCT monomer as  
373 a substrate. While no specific activity to TCT monomer was detected for the empty vector control  
374 or buffer alone, WT FTL1678 was active against the TCT monomer (11.0 nmols/min/mg). By  
375 comparison, no activity was detected for any of the double or triple mutant proteins (Table S4),  
376 suggesting that two or more of the catalytic triad residues are required for FTL1678 Ldc activity.

377         The Ldc ortholog alignment (Figure 1) highlighted that, of the six Ldc orthologs examined  
378 here, only *C. jejuni* Pgp2 lacked the Ser-Glu-His catalytic triad. However, *C. jejuni* Pgp2 has been  
379 shown to exhibit LdcA activity (Friedrich, 2014), indicating that a Ser-Glu-His catalytic triad is not  
380 required for LdcA function. To test if an LdcA ortholog, without the Ser-Glu-His catalytic triad,  
381 could restore virulence in the  $\Delta FTL1678$  mutant, we complemented  $\Delta FTL1678$  with a 6 $\times$  His-  
382 tagged Pgp2 from *C. jejuni* and infected mice with either WT LVS,  $\Delta FTL1678$ ,  $\Delta FTL1678$  *trans-*



383 complemented with FTL1678, or  $\Delta FTL1678$  *trans*-complemented with *C. jejuni* Pgp2. While  
384  $\Delta FTL1678$  was fully attenuated (100% survival through day 21), the Pgp2 *trans*-complement was  
385 fully-virulent (median time-to-death 6 days; all mice dead by day 7), nearly identical to WT LVS  
386 (median time-to-death 7 days; all mice dead by day 7) and the FTL1678 *trans*-complement  
387 (median time-to-death 6 days; all mice dead by day 7; Figure 5C). This *in vivo* data provides further  
388 evidence that FTL1678 is an Ldc and Ldc activity is required for *F. tularensis* virulence.

389 To provide additional evidence that FTL1678 exhibits Ldc activity and that *C. jejuni* Pgp2  
390 functionally complements  $\Delta FTL1678$ , the FTL1678 *trans*-complement and Pgp2 *trans*-  
391 complement were examined by TEM, revealing that both complemented strains had similar  
392 morphology as WT LVS (Figure S7A and S7B; Figure 3A). Additionally, OM thickness and cell  
393 width were measured for WT,  $\Delta FTL1678$ , and both complemented strains, demonstrating that both  
394 complemented strains had OM thicknesses and cell widths similar to WT, and both complemented  
395 strains were significantly different from  $\Delta FTL1678$  (Figure S7C and S7D). Finally, when grown  
396 in the presence of various stressors (*e.g.*, 5 mM H<sub>2</sub>O<sub>2</sub>, 5% NaCl, pH 5.5, antibiotics, SDS,  
397 lysozyme, or ethidium bromide), both complemented strains exhibited similar phenotypes as WT  
398 LVS (Figure S8A-D and Table S5). Taken together, these studies indicated that at least two  
399 residues of the putative Ser134-Glu239-His308 catalytic triad are required for FTL1678 LdcA  
400 enzymatic activity. These studies also demonstrated that an LdcA ortholog can functionally  
401 complement  $\Delta FTL1678$ , further supporting that FTL1678 is an LdcA ortholog.

402

403 *FTL1678 is required for F. tularensis replication in macrophages*

404 *F. tularensis* is an intracellular pathogen and macrophages appear to be one of the major  
405 targets for *F. tularensis* infection and replication (De Pascalis, 2018; Hall, 2008; Steiner, 2017).  
406 To investigate potential replication defects of  $\Delta FTL1678$  in macrophages, J774A.1 macrophages

407 or murine bone marrow-derived macrophages (mBMDM) were infected with either WT LVS or  
408  $\Delta FTL1678$  (MOI 100:1) and bacterial numbers were enumerated at 0 h (entry), 6 h, and 24 h post-  
409 infection. At entry (0 h), approx. 2.5-logs more  $\Delta FTL1678$  were present in both macrophage lines,  
410 compared with WT LVS (Figure 6A). This likely was due to the above noted gentamicin resistance  
411 of  $\Delta FTL1678$  (Table 2). Attempts to normalize entry numbers for both WT LVS and  $\Delta FTL1678$ ,  
412 using different antibiotics or combinations of antibiotics, were not successful. Despite higher  
413 numbers of  $\Delta FTL1678$  in both macrophages at entry (0 h) and 6 h,  $\Delta FTL1678$  was unable to  
414 replicate in either macrophage, and decreased approx. 1-log from 6 h to 24 h (Figure 6A). By  
415 comparison, WT LVS numbers increased 1.5- to 2-logs from 6 h to 24 h (Figure 6A). To normalize  
416 WT LVS and  $\Delta FTL1678$  bacterial numbers and replication rates in both macrophages, fold change  
417 in bacterial numbers was calculated from 6 h to 24 h: WT was found to increase 2.5- and 1.5-logs  
418 in J774A.1 and mBMDMs, respectively, whereas  $\Delta FTL1678$  was found to decrease 0.5- to 1-log,  
419 respectively (Figure 6B). Taken together, these *in vitro* results (Figures 6A and 6B) confirm the  
420 observed *in vivo* attenuation of  $\Delta FTL1678$  (Figures 5A and 5B).

421

#### 422 *$\Delta FTL1678$ protects mice against Type A *F. tularensis* infection*

423 No FDA-approved vaccine currently is available to prevent tularemia. In addition, *F.*  
424 *tularensis* is designated as an NIH Category A priority pathogen and CDC Tier 1 Select Agent,  
425 highlighting the extreme virulence of this bacterium and the need for a safe and effective vaccine  
426 to prevent tularemia. Given our above findings that  $10^5$  CFU of  $\Delta FTL1678$  did not cause disease  
427 or death in mice (Figures 5A and 5C), we next examined whether high doses ( $10^7$  or  $10^9$  CFU) of  
428  $\Delta FTL1678$  were attenuated or if  $\Delta FTL1678$  immunization could protect mice from fully-virulent  
429 Type A *F. tularensis* SchuS4 challenge. First, all mice intranasally immunized with either  $10^5$ ,  
430  $10^7$ , or  $10^9$  CFU of  $\Delta FTL1678$  survived through day 28 post-infection, with no signs of clinical

431 disease (Figure 7A). Next, on day 29, all mice were boosted with  $10^9$  CFU of  $\Delta FTL1678$  and no  
432 mice demonstrated any signs of disease through day 50 (Figure 7A). Finally, on day 51, mice  
433 were intranasally-challenged with 120 CFU ( $6\times$  the  $LD_{50}$ ) of SchuS4 and the health status of each  
434 immunization group was monitored for 26 days post-challenge. In a dose-dependent manner, the  
435  $10^9$  prime- $10^9$  boost regimen conferred 80% protection, the  $10^7$  prime- $10^9$  boost regimen conferred  
436 40% protection, and the  $10^5$  prime- $10^9$  boost regimen conferred 20% protection (Figure 7B).  
437 These data demonstrate that  $\Delta FTL1678$  is highly attenuated (up to  $10^9$  CFU) and that  $\Delta FTL1678$   
438 may be able to be used as a live, attenuated vaccine.

439

#### 440 *$\Delta FTL1678$ does not cause tissue damage*

441 The *in vitro* (Figure 6) and *in vivo* (Figures 5A, 5B, 7A) attenuation of  $\Delta FTL1678$ , as well  
442 as protection against SchuS4 pulmonary challenge (Figure 7B), indicated that  $\Delta FTL1678$  could be  
443 used as a live, attenuated vaccine. While live, attenuated vaccines have been extremely effective  
444 at preventing a number of diseases, they can pose safety challenges (Minor, 2015; Roberts, 2018).  
445 To assess whether  $\Delta FTL1678$  immunization induced any pathology in immunized mice, lungs,  
446 livers, and spleens from uninfected, WT LVS-, or  $\Delta FTL1678$ -infected mice were assessed for  
447 pathologic changes on day 5 post-infection/immunization. Day 5 is when mice exhibit severe  
448 signs of disease and is one day before the majority of WT-infected mice begin succumbing to  
449 disease (Figures 5 and 7). WT LVS-infected lungs demonstrated alveolar wall thickening, large  
450 areas of inflammation, and severe neutrophil infiltration (Figure 8A). By comparison, little  
451 inflammation was observed in  $\Delta FTL1678$ -infected lungs, although some red blood cell congestion  
452 was present, indicating a limited, acute immune response that was quickly resolved (Figure 8A).  
453 Whereas WT LVS-infected livers were characterized by diffuse inflammation with focal areas of  
454 necrosis,  $\Delta FTL1678$ -infected livers were virtually indistinguishable from uninfected livers, with

455 no observable pathology (Figure 8A). Finally, although the architecture of WT LVS-infected  
456 spleens lacked distinct areas of white pulp or red pulp, indicative of a severe infection,  $\Delta FTL1678$ -  
457 infected spleens were observed to contain distinct areas of red pulp and white pulp, with some red  
458 blood cell congestion – indicating a limited, acute immune response that was quickly resolved  
459 (Figure 8A). All tissues were blindly scored using a pathology severity index (scale from 0 to 4,  
460 with 4 indicating severe pathology), confirming that  $\Delta FTL1678$ -infected tissues were virtually  
461 indistinguishable from uninfected tissues (pathology scores of 1 for lungs, 0 for liver, and 1.5 for  
462 spleens) and WT LVS-infected tissues had significantly higher pathology scores (pathology scores  
463  $>3.5$  for all tissues; Figure 8B).

464

## 465 **Discussion**

466 Bacterial PG is a complex, mesh-like structure, composed of a glycan backbone,  
467 crosslinked to varying degrees, by peptide chains (de Pedro, 2015). It is well known that this  
468 structure plays an important role in maintaining Gram-negative bacterial cell morphology,  
469 membrane integrity, regulating changes in osmotic pressure, and providing a platform for  
470 attachment of the OM (den Blaauwen, 2008; Silhavy et al, 2010). Although a majority of PG  
471 studies have focused on how the thick layer of PG in Gram-positive bacteria contributes to  
472 virulence and antibiotic resistance, more recent studies have highlighted that Gram-negative PG  
473 also is intimately linked with pathogenicity (Juan, 2018).

474 PG recycling is an essential function of Gram-negative bacteria during cell growth and  
475 division to produce new cell wall components. In fact, Gram-negative bacteria recycle up to 60%  
476 of their PG with every generation, suggesting that both PG synthesis and PG recycling are dynamic  
477 (Dhar, 2018; Typas, 2011). A number of proteins are involved in these processes and, while they  
478 are well-characterized in *E. coli*, very little is known about these pathways in intracellular

479 pathogens such as *Burkholderia pseudomallei*, *Legionella pneumophila*, or *F. tularensis* (Jenkins,  
480 2019; Kijek, 2019; Spidlova, 2018; van Heijenoort, 2011).

481 *E. coli* LdcA, a cytoplasmic protein, was the first L,D-carboxypeptidase to be identified  
482 and was shown to be important for PG recycling and survival during stationary phase (Templin,  
483 1999; Ursinus, 1992). More recently, Ldc orthologs have been identified in *P. aeruginosa* (Korza,  
484 2005), *C. jejuni* (Firdich, 2014), *N. gonorrhoeae* (Lenz et al, 2017), and *N. aromaticivorans* (Das,  
485 2013). In this study, we identified an *F. tularensis* Ldc ortholog, FTL1678, which we propose  
486 naming LdcA based on its confirmed L,D, carboxypeptidase activity (Table 1) and role in  
487 maintaining bacterial morphology. Unlike well-characterized cytoplasmic LdcA orthologs from  
488 *E. coli* and *P. aeruginosa*, we demonstrated that *F. tularensis* LdcA was localized to OM fractions  
489 and, given co-localization with PG-associated proteins Pal and TolB, is most likely located on the  
490 inner leaflet of the OM or in the periplasm (associated with PG). At this time, we can only  
491 speculate on the OM-association or periplasmic localization of *F. tularensis* LdcA, but in the  
492 context of PG repair and recycling, periplasmic LdcA certainly offers a fitness advantage. In  
493 addition, this is not the first report of a periplasmic LdcA, as *C. jejuni* Pgp2 is predicted to be  
494 periplasmic and *N. gonorrhoeae* LdcA previously was reported to be periplasmic (Firdich, 2014;  
495 Lenz, 2017).

496 Our results demonstrated, for the first time, that *F. tularensis* LdcA directly acts on the  
497 TCT tetrapeptide and the reducing PG monomer. More importantly, we demonstrated that *F.*  
498 *tularensis* LdcA directly cleaves PG pentapeptides to tripeptides, without a prior cleavage event  
499 by a D,D-carboxypeptidase/penicillin binding protein (PBP), such as DacD, and that FTL1678  
500 cleaves TCT dimers with 4-3 and 3-3 cross links, highlighting that *F. tularensis* LdcA is a multi-  
501 functional enzyme that performs both L,D-carboxypeptidase and L,D- and D,D-endopeptidase  
502 activities (Table 1 and Table S2). . It should be noted that although *N. gonorrhoeae* LdcA has

503 been reported to have L,D-endopeptidase activity, this activity is specific to tetrapeptide cross links  
504 (3-3 cross links) (Lenz, 2017). Interestingly, only two previous studies have examined putative *F.*  
505 *tularensis* PG modifying enzymes and both studies primarily focused on the role of an *F. tularensis*  
506 DacD ortholog in virulence, with no PG activity assays to confirm function (Kijek, 2019; Spidlova,  
507 2018). In our PG cleavage analysis, *F. tularensis* LdcA demonstrated the highest specific activity  
508 on disaccharide-tetrapeptide PG substrates (GlcNAc-anhydroMurNAc-L-Ala- $\gamma$ -D-Glu-*meso*-  
509 A<sub>2</sub>pm-D-Ala [TCT] and GlcNAc-MurNAc-L-Ala- $\gamma$ -D-Glu-*meso*-A<sub>2</sub>pm-D-Ala [reducing PG  
510 monomer]), followed by cleavage of pentapeptide PG substrates (MurNAc-L-Ala- $\gamma$ -D-Glu-*meso*-  
511 A<sub>2</sub>pm-D-Ala-D-Ala and UDP-MurNAc-L-Ala- $\gamma$ -D-Glu-*meso*-A<sub>2</sub>pm-D-Ala-D-Ala). Despite high  
512 specific activity of *F. tularensis* LdcA on tetrapeptide attached to the disaccharide, *F. tularensis*  
513 LdcA demonstrated approximately 6-times lower specific activity on free tetrapeptide (no sugars)  
514 (Table 1). In contrast, *E. coli* LdcA has been shown to have the highest specific activity on free  
515 tetrapeptide, monosaccharide-tetrapeptide (MurNAc-L-Ala- $\gamma$ -D-Glu-*meso*-A<sub>2</sub>pm-D-Ala), and  
516 monosaccharide tetrapeptide linked to a glycan lipid carrier (UDP-MurNAc-tetrapeptide)  
517 (Templin, 1999), but is unable to cleave dimeric muropeptides. Additionally, *F. tularensis* LdcA  
518 was active against TCT dimers (two crosslinked TCT monomers), cleaving the 4-3 cross linkage  
519 between D-Ala and A<sub>2</sub>pm and the 3-3 cross linkage between A<sub>2</sub>pm and A<sub>2</sub>pm, but was not active  
520 on PG polymers. This TCT dimer cleavage indicates that, in addition to L,D carboxypeptidase  
521 activity, *F. tularensis* LdcA possesses L,D- and D,D-endopeptidase activity on peptide cross-links.

522 Previous studies have shown that Ldc orthologs are important for bacterial morphology  
523 and membrane integrity. Deletion of the *ldc* orthologs *csd6* from *H. pylori* (Sycuro, 2013) and  
524 *pgp2* from *C. jejuni* (Firdich, 2014) resulted in loss of helical morphology. Here, we demonstrated  
525 that FTL1678 is essential for maintaining both the size (width) and the coccobacillus morphology  
526 of *F. tularensis*, as  $\Delta$ FTL1678 were significantly-smaller than WT and exhibited a more-rounded,

527 cocci shape than WT (Figure 3). Further evidence for the role of *F. tularensis* LdcA in modifying  
528 and recycling PG, which impacts bacterial morphology, is provided by TEM images of  $\Delta FTL1678$   
529 bacteria that had prominent three-layered structures at their periphery, including a thick middle  
530 layer (presumably PG), compared to WT (Figure 3). In  $\Delta FTL1678$  bacteria, it is possible that loss  
531 of LdcA activity may have reduced PG recycling or may have affected the breakdown of existing  
532 PG (important for cell division), resulting in a buildup of pentapeptides or tetrapeptides that are  
533 highly-crosslinked. Our lab and others have repeatedly attempted to isolate and analyze *F.*  
534 *tularensis* PG but these attempts have not been unsuccessful (data not shown; Martin Pavelka, U.  
535 Rochester, personal communication). As such, we can only speculate on the true nature of the  
536 thick PG and OM layers in  $\Delta FTL1678$  (Figure 3).

537         Because  $\Delta FTL1678$  bacteria were found to have a thicker OM (Figure 3C), a prominent  
538 middle layer in their envelope (presumably PG; Figure 3B), and altered cell morphology (Figure  
539 3B), we investigated differences in WT and  $\Delta FTL1678$  susceptibility to various antibiotics,  
540 detergents, and stressors. Vancomycin and lysozyme, usually not effective against Gram-  
541 negatives due to their inability to penetrate the OM, inhibited  $\Delta FTL1678$  growth (Table 2),  
542 indicating increased permeability of the  $\Delta FTL1678$  OM. Vancomycin, in particular, may have  
543 been effective on  $\Delta FTL1678$  because its mechanism of action includes binding to the two terminal  
544 D-Ala-D-Ala residues of PG pentapeptide chains and preventing cross-linking of monomers.  
545  $\Delta FTL1678$  may have increased amounts of pentapeptides present in its PG, providing more targets  
546 for vancomycin action. Similarly, ampicillin inhibits bacterial transpeptidases, which blocks  
547 cross-linking of peptide side chains of PG strands. Taken together, the enhanced susceptibility of  
548  $\Delta FTL1678$  bacteria to vancomycin and ampicillin supports the role of *F. tularensis* LdcA as a PG-  
549 modifying enzyme. Conversely,  $\Delta FTL1678$  was more resistant to antibiotics and molecules that  
550 must cross the IM to exert their toxic effects, including gentamicin, tetracycline, chloramphenicol,

551 ciprofloxacin, and ethidium bromide (Table 2), suggesting that  $\Delta FTL1678$  bacteria have a less  
552 permeable IM. Mechanisms to explain why  $\Delta FTL1678$  bacteria were more resistant to other  
553 stressors, including Triton X-100, H<sub>2</sub>O<sub>2</sub>, high salt, and low pH, are less clear, but could include  
554 increased expression/activity of chaperone proteins, efflux pumps, antioxidant/scavenger proteins,  
555 and membrane stabilizing proteins (Knodler et al, 2003; Lund et al, 2014; Mishra & Imlay, 2012).

556 The extreme virulence of Type A *F. tularensis* and its designation as a Tier 1 Select Agent  
557 highlight why studies to identify *F. tularensis* virulence factors and the development of new  
558 vaccines is important. In this study, we identified the role of a previously unstudied protein,  
559 FTL1678, in PG recycling, PG integrity, and bacterial morphology. In addition, we found that  
560 FTL1678 was required for *F. tularensis* LVS virulence and demonstrated that  $\Delta FTL1678$   
561 conferred 80% protection against fully-virulent, Type A *F. tularensis* SchuS4 pulmonary  
562 challenge. Further studies are needed to determine specific immune responses induced by  
563  $\Delta FTL1678$  immunization, as well as to identify the most effective immunization regimen (e.g.,  
564 number of immunizations and time between immunizations).

565 Finally, given our findings that PG maintenance and recycling are important for *F.*  
566 *tularensis* virulence, and that future studies may reveal additional PG-associated enzymes, we used  
567 bioinformatic approaches to predict other proteins involved in *F. tularensis* PG synthesis and  
568 recycling (Figure 9). While at least seven PG synthesis and recycling genes/proteins orthologs  
569 could not be identified, 22 putative PG synthesis and recycling proteins were identified in *F.*  
570 *tularensis* (Figure 9). Of these, only DacD (FTL1060/FTT1029) has been studied in *F. tularensis*.  
571 Given our observed attenuation of  $\Delta FTL1678$ , future studies to better understand PG synthesis and  
572 recycling pathways may offer more opportunities to better understand the virulence of *F. tularensis*  
573 and other intracellular pathogens. Characterization of other proteins involved in PG pathways may



574 provide clues as to why *F. tularensis* LdcA is OM-associated or periplasmic and encodes both  
575 L,D-carboxypeptidase and L,D-endopeptidase activities.

576

577

## 578 **Experimental Procedures**

### 579 *Bacterial strains and culture conditions*

580 *F. tularensis* Type A strain SchuS4 and *F. tularensis* Type B strain LVS were obtained from BEI  
581 Resources and cultured as previously described (Ren, 2014; Wu, 2016). All experiments with  
582 SchuS4 were performed under BSL3 containment conditions at the University of Toledo Health  
583 Science Campus BSL3 laboratory. Routine *F. tularensis* cultures were grown overnight at 37°C  
584 with 5% CO<sub>2</sub> on supplemented Mueller-Hinton agar (sMHA): Mueller-Hinton broth powder  
585 (Becton Dickinson) was mixed with 1.6% (wt/vol) Bacto Agar (Becton Dickinson), autoclaved,  
586 and further supplemented with 2.5% (vol/vol) bovine calf serum (Hyclone), 2% (vol/vol)  
587 IsoVitaleX (Becton Dickinson), 0.1% (wt/vol) glucose, and 0.025% (wt/ vol) iron pyrophosphate.  
588 For mouse infections, *F. tularensis* was first grown on sMHA then transferred to Brain Heart  
589 Infusion agar (BHI; Becton Dickinson). Chocolate agar for mutant strain generation was prepared  
590 by mixing Mueller Hinton broth powder with 1.6% (wt/vol) agar, 1% (wt/vol) tryptone, and 0.5%  
591 (wt/vol) sodium chloride, autoclaved, and further supplemented with 1% (wt/vol) hemoglobin and  
592 1% (vol/vol) IsoVitaleX. For macrophage infections, *F. tularensis* was first grown on sMHA then  
593 transferred to modified chocolate agar: Mueller-Hinton broth powder was mixed with 1.6%  
594 (wt/vol) Bacto Agar, 1% hemoglobin (wt/vol), and 1% (vol/vol) IsoVitaleX. All growth curves  
595 were performed in sMHB: Mueller-Hinton broth powder was mixed with 182 mg/L calcium  
596 chloride dihydrate, and 210 mg L<sup>-1</sup> magnesium chloride hexahydrate, 0.1% (wt/vol) glucose,  
597 0.025% (wt/vol) iron pyrophosphate, and 2% (vol/vol) IsoVitaleX. All bacterial strains and

598 plasmids are listed in Table S6. *E. coli* S17-1 and *E. coli* NEB10- $\beta$  were grown in Luria Bertani  
599 (LB) broth or on LB agar at 37°C, supplemented as needed with antibiotics.

600

#### 601 *Sequence Alignments and Bioinformatic Predictions*

602 Amino acid alignments of *F. tularensis* subsp. *holarctica* FTL\_1678, *F. tularensis* subsp.  
603 *tularensis* FTT\_0101, *E. coli* LdcA (BAA36050.1), *P. aeruginosa* LdcA (Q9HTZ1), *N.*  
604 *gonorrhoeae* (YP\_208343.1), and *C. jejuni* Pgp2 (WP\_002856863) were performed using Clustal  
605 Omega (<https://www.ebi.ac.uk/Tools/msa/clustalo/>) and MView  
606 (<https://www.ebi.ac.uk/Tools/msa/mview/>). Pairwise sequence alignments were performed and  
607 amino acid identities among Ldc homologues were calculated by EMBOSS Needle  
608 ([https://www.ebi.ac.uk/Tools/psa/emboss\\_needle/](https://www.ebi.ac.uk/Tools/psa/emboss_needle/)). The Prokaryotic Genome Analysis Tool  
609 (PGAT) (<http://tools.uwgenomics.org/pgat/>), BlastP, and BlastX analyses  
610 (<http://blast.ncbi.nlm.nih.gov>) were used to identify *F. tularensis* homologues. Bacterial protein  
611 sub-localization was predicted by PSORTb version 3.0.2 (<https://www.psорт.org/psортb/>). Protein  
612 signal sequence prediction was performed by LipoP version 1.0  
613 (<http://www.cbs.dtu.dk/services/LipoP/>) and SignalP version 4.1  
614 (<http://www.cbs.dtu.dk/services/SignalP-4.1/>).

615

#### 616 *Generation of F. tularensis gene deletion mutants*

617 *F. tularensis* isogenic deletion mutants were generated by homologous recombination as  
618 previously described (Wu, 2015). Briefly, 500 bp regions upstream and downstream from the gene  
619 of interest (*FTL1678* or *FTT0101*) were PCR-amplified from *F. tularensis* genomic DNA using  
620 the following primers: FTL1678\_A and FTL1678\_B; FTL1678\_C and FTL1678\_D; FTT0101\_A  
621 and FTT0101\_B; FTT0101\_C and FTT0101\_D (Table S7). A FLP recombination target (FRT)-

622 flanked Pfn-kanamycin resistance cassette, FRT-Pfn-kan-FRT, was PCR amplified from pLG66a  
623 (Gallagher, 2008) and splicing overlap extension PCR (SOE PCR) was used to join the upstream  
624 (A-B) and downstream (C-D) regions with FRT-Pfn-kan-FRT, which replaced the gene of interest.  
625 The resulting insert and a suicide plasmid, pTP163 (Robertson, 2013), were digested with ApaI  
626 (New England Biolabs), and ligated using T4 DNA ligase (New England Biolabs). Gene deletion  
627 constructs were transformed into NEB10- $\beta$  *E. coli* (New England Biolabs), sequence-verified,  
628 transformed into *E. coli* S17-1, and conjugation was performed with *F. tularensis* LVS on sMHA  
629 plates. Conjugants were recovered on chocolate agar supplemented with 200 mg L<sup>-1</sup> hygromycin  
630 and 100 mg L<sup>-1</sup> polymyxin B. Individual mutants were selected by sequential plating on sMHA  
631 supplemented with 10 mg L<sup>-1</sup> kanamycin (sMHA-kan10), sMHA-kan10 with 8% (wt/vol) sucrose,  
632 and final replica plating onto sMHA containing either 200 mg L<sup>-1</sup> hygromycin (sMHA-hyg200) or  
633 sMHA-kan10. Hyg-sensitive and kan-resistant colonies were sequence verified (referred to  
634 hereafter as either  $\Delta FTL1678$  or  $\Delta FTT0101$ ).

635

#### 636 *FTL1678* complementation *in trans*

637 Complementation *in trans* was performed as previously described, with some modifications (Wu,  
638 2016). *FTL1678* was PCR-amplified from *F. tularensis* LVS using primers  
639 5'*FTL1678*\_NEBuilder and 3'*FTL1678*\_NEBuilder (Table S7), pQE-60 (Qiagen) was double-  
640 digested with NcoI and BglII (New England Biolabs), and the NEBuilder HiFi DNA Assembly  
641 Cloning kit was used to ligate the *FTL1678* amplicon and digested pQE-60. The construct was  
642 transformed into NEB 10- $\beta$  *E. coli* and transformants were selected on LB agar supplemented with  
643 100 mg L<sup>-1</sup> ampicillin (LB-amp). Plasmids were purified from individual clones using the Qiagen  
644 QIAprep Spin Miniprep kit (Qiagen), diagnostic PCR was performed to confirm insert presence  
645 and correct size, and DNA sequencing was performed to verify insert integrity. The resulting

646 construct, *FTL1678* with a C-terminal 6x histidine tag, was PCR-amplified using primers  
647 5'*FTL1678\_pFNLTP6* and 3'*FTL1678\_pFNLTP6* (Table S7), the amplicon and pFNLTP6-gro-  
648 GFP (Maier, 2004) were double-digested with XhoI and BamHI (New England Biolabs), and  
649 ligated using T4 DNA Ligase. The construct, pFNLTP6-gro-*FTL1678*-6xHis, was transformed  
650 into NEB10- $\beta$  *E. coli*, transformants were selected on LB plates supplemented with 50 mg L<sup>-1</sup>  
651 kanamycin (LB-kan), and DNA sequencing was performed to verify *FTL1678*-6xHis integrity.  
652 Next, the kan resistance gene was removed from  $\Delta$ *FTL1678* by suspending the strain in 0.5 M  
653 sucrose (in 1 mM EDTA, pH 7.5), washing three times, and electroporating the shuttle plasmid  
654 pTP405 (Robertson, 2013), which encodes the Flp recombinase to remove FRT-Pfn-kan-FRT from  
655 the genome. Bacteria were grown overnight on sMHA-hyg200, hyg-resistant transformants were  
656 passaged three times on sMHA, then transformants were replica plated onto sMHA-hyg200 and  
657 sMHA-kan10 to confirm sensitivity to both antibiotics (kan-cured  $\Delta$ *FTL1678*). pFNLTP6-gro-  
658 *FTL1678*-6xHis was transformed into kan-cured  $\Delta$ *FTL1678* by electroporation, transformants  
659 were selected on sMHA-kan10, and expression of *FTL1678* was confirmed by immunoblot  
660 analysis (referred to hereafter as  $\Delta$ *FTL1678 trans*-complement).

661

#### 662 *C. jejuni Pgp2 complementation in trans*

663 Complementation of *C. jejuni pgp2* (CJJ81176\_0915) into  $\Delta$ *FTL1678* was performed as described  
664 above, with several modifications. The *pgp2* gene, with the *FTL1678* signal sequence (amino acid  
665 residues 1-29) in place of the native *Pgp2* signal sequence (amino acid residues 1-18), was  
666 synthesized and inserted in pQE-60 by GenScript USA. pQE-60-*pgp2* was transformed into  
667 NEB10- $\beta$  *E. coli* and selection was performed on LB-amp. *Pgp2*-6xHis was amplified from pQE-  
668 60 using primers 5'*FTL1678\_pFNLTP6* and 3'*FTL1678\_pFNLTP6* (Table S7), the amplicon was  
669 ligated into similarly digested pFNLTP6, pFNLTP6-gro-*pgp2*-6xHis was transformed into

670 NEB10- $\beta$  *E. coli*, and transformants were selected on LB-kan. Plasmids were purified from kan-  
671 resistant transformants, sequence verified, then electroporated into kan-cured  $\Delta$ FTL1678. Pgp2  
672 expression was confirmed by immunoblot analysis.

673

#### 674 *Mouse Infections*

675 All animal studies were approved by the University of Toledo Institutional Animal Care and Use  
676 Committee (IACUC). Mouse infections were performed as previously described (Huntley, 2008),  
677 with some modifications. Briefly, *F. tularensis* strains were grown on sMHA overnight,  
678 transferred to BHI agar for an additional 20-24 h, suspended in sterile PBS, and diluted to the  
679 desired concentration (20 to  $10^9$  CFU/20  $\mu$ l) based on previous OD<sub>600</sub> measurements and bacterial  
680 enumeration studies. Groups of 4-8 female C3H/HeN mice (6-8 weeks old; Charles River  
681 Laboratories) were anesthetized with a ketamine-xylazine sedative and intranasally (i.n.) infected  
682 with 20  $\mu$ l of prepared bacterial suspensions. Bacterial inocula were serially-diluted and plated  
683 in quadruplet on sMHA to confirm CFUs. For survival studies, mice were monitored daily, for  
684 signs of disease, with health status scores (scale of 1-5, with 1 indicating healthy and 5 indicating  
685 mouse found dead) being recorded for each mouse. Moribund mice were humanely euthanized to  
686 minimize suffering. To quantitate bacterial tissue burdens, groups of 4 mice were euthanized on  
687 days 2 and 5 post-infection, blood was collected by cardiac puncture and plated onto sMHA, lungs,  
688 livers, and spleens were aseptically harvested, homogenized, 25  $\mu$ l of PBS/mg of tissue was added  
689 to each tissue, serially-diluted, and dilutions were plated onto sMHA. Following 72 h of  
690 incubation, the number of colonies per plate were counted and CFU/mg (tissues) or CFU/ml  
691 (blood) were calculated based on tissue weight and dilution factor. For immunization and  
692 challenge studies, groups of 4-10 mice were i.n. immunized with either 100-300 CFU LVS or  $10^4$ -  
693  $10^9$  CFU  $\Delta$ FTL1678, boosted 3-4 weeks later with either  $10^3$  CFU LVS or  $10^9$  CFU  $\Delta$ FTL1678,

694 transported to the ABSL3 facility 3-weeks later, and i.n. challenged with 20-120 CFU of *F.*  
695 *tularensis* SchuS4. Mice were monitored daily for signs of disease with health status scores being  
696 recorded for each mouse.

697

### 698 *Membrane Integrity Testing*

699 Sensitivity of LVS,  $\Delta$ FTL1678, FTL1678 *trans*-complement, and the Pgp2 *trans*-complement to  
700 various antibiotics, detergents, dyes, and cell wall stressors was determined by disk diffusion  
701 assays or in liquid cultures, as previously described (Wu, 2016), with some modifications.  
702 Bacterial strains were grown on either sMHA or sMHA-kan10 ( $\Delta$ FTL1678 and complement  
703 strains), scraped and resuspended in sterile PBS, adjusted to an OD<sub>600</sub> of 0.2 (approx.  $9 \times 10^7$   
704 CFU/ml), diluted 1:1 in PBS, and 100  $\mu$ l was plated onto sMHA plates using cotton tipped  
705 applicators (Puritan). Sterile paper disks (Whatman; 0.8 mm thick, 6.5 mm in diameter) were  
706 placed in the center of each plate and antibiotics, detergents, or dyes were added to the disks at the  
707 concentrations listed in Table 2. Antibiotics tested were: gentamicin (Gibco), tetracycline (Fisher  
708 Scientific), chloramphenicol (Acros Organics), ciprofloxacin (Oxoid), ampicillin (Fisher  
709 Scientific), vancomycin (Acros Organics), bacitracin (Oxoid), bacitracin (Oxoid), ciprofloxacin  
710 (Oxoid), and polymyxin b (MP Biomedicals). Detergents tested were: sodium dodecyl sulfate  
711 (SDS; anionic; Fisher Scientific), Triton X-100 (nonionic; Acros Organics), cetyltrimethyl  
712 ammonium bromide (CTAB; cationic; MP Biomedicals), 3-cholamidopropyl dimethylammonio  
713 1-propanesulfonate (CHAPS; zwitterionic; Thermo Scientific). In addition, sensitivity to ethidium  
714 bromide (Thermo Scientific) and lysozyme (Thermo Fisher) also was tested. After 48 h, diameters  
715 of zones of inhibition around the disks were measured. Experiments were performed in triplicate.  
716 For liquid cultures, bacteria were suspended in sMHB, adjusted to OD<sub>600</sub> 0.4, and 5 ml of each  
717 bacterial suspensions was inoculated into 100 ml of either sMHB or sMHB with 5 mM hydrogen

718 peroxide (H<sub>2</sub>O<sub>2</sub>), 5% sodium chloride (NaCl), or pH 5.5 (pH of sMHB is 6.5). Cultures were  
719 grown at 37°C with rotation at 180 rpm for 24 h with OD<sub>600</sub> readings recorded every 4 hours.

720

### 721 *Electron Microscopy*

722 Electron microscopy was used to visualize differences in bacterial envelope structure and cell  
723 shape, as previously described (Wu, 2016), with some modifications. LVS,  $\Delta$ FTL1678, FTL1678  
724 *trans*-complement, and the Pgp2 *trans*-complement were grown overnight in sMHB, approx.  
725 1x10<sup>9</sup> CFU of each bacterial strain was pelleted by centrifugation at 7000 × *g* at 4°C, washed three  
726 times in PBS, fixed in 3% (vol/vol) glutaraldehyde (Electron Microscopy Sciences [EMS]) for  
727 approx. 24 hours, washed twice in sodium cacodylate buffer (pH 7.4; EMS) for 10 min, suspended  
728 in 1% (wt/vol) osmium tetroxide (EMS) in s-collidine buffer (pH 7.4; EMS) for 45 min at room  
729 temperature (r/t) to stain and fix the samples, washed two times with sodium cacodylate buffer for  
730 10 min each, and tertiary fixation was performed using an aqueous saturated solution of uranyl  
731 acetate (pH 3.3; EMS) for 45 min at r/t. Samples were then dehydrated at room temperature using  
732 a series of ethanol washes: two washes with 30% ethanol for 10 min each; two washes with 50%  
733 ethanol for 10 min each; two washes with 95% ethanol for 10 min each; two washes with 100%  
734 ethanol for 10 min each; and two washes with 100% acetone for 10 min each. Samples were then  
735 infiltrated with 50% acetone and 50% embedding media (Hard Plus Resin 812, EMS) for 8 h to  
736 overnight at r/t. Samples were embedded in 100% embedding media (EMS) and allowed to  
737 polymerize for 8 h to overnight at 85°C, then sectioned at 85–90 nm, and visualized using a Tecnai  
738 G2 Spirit transmission electron microscope (FEI) at 80 kV and Radius 1.3 (Olympus) camera  
739 software at the University of Toledo Electron Microscopy Facility. Experiments were performed  
740 twice to confirm reproducibility, with two bacterial preparations fixed, stained, embedded,  
741 sectioned, and visualized per experiment.

742

743 *Spheroplasting and Sucrose Density Gradient Centrifugation*

744 Spheroplasting, osmotic lysis, and sucrose density gradient centrifugation was performed as  
745 previously described (Huntley, 2007) to determine subcellular localization of FTL1678. Briefly,  
746 the histidine-tagged FTL1678 *trans*-complement was grown in sMHB to an OD<sub>600</sub> of 0.3-0.4,  
747 pelleted at 7500 × g for 30 min at 10°C, supernatants were removed, pellets were resuspended in  
748 0.75 M sucrose (in 5 mM Tris, pH 7.5) with gentle mixing, 10 mM EDTA (in 5 mM Tris, pH 7.8)  
749 was slowly added over 10 min, and the suspension was incubated for 30 min at r/t. After  
750 incubation, lysozyme was slowly added to a final concentration of 200 µg ml<sup>-1</sup>, incubated for 30  
751 min at r/t, bacteria were osmotically lysed by dilution into 4.5 × volume of molecular-grade water  
752 (Corning) over 11 min with gentle mixing, and incubated for 30 min at r/t. Lysates were  
753 centrifuged at 7,500 × g for 30 min at 10°C to remove intact cells and cellular debris. Supernatants  
754 were collected and centrifuged at 182,500 × g for 2 h at 4°C in a F37L 8 × 100 Fiberlite  
755 Ultracentrifuge rotor. Following centrifugation, supernatants were removed, membrane pellets  
756 were gently resuspended in 6 ml of resuspension buffer (25% [wt/wt] sucrose, 5 mM Tris, 30 mM  
757 MgCl<sub>2</sub>, 1 tablet of Pierce Protease Inhibitor Mini Tablets, EDTA-Free [Thermo Scientific], 5 U  
758 Benzonase [Novagen]), suspensions were incubated with gentle mixing for 30 min at room  
759 temperature to degrade DNA, and a DC protein assay (Bio-Rad) was performed to determine total  
760 protein yield. Linear sucrose gradients were prepared by layering 1.8 ml each of sucrose solutions  
761 (wt/wt; prepared in 5 mM EDTA, pH 7.5) into 14- by 95-mm ultracentrifuge tubes (Beckman) in  
762 the following order: 55%, 50%, 45%, 40%, 35%, and 30%. Membrane suspensions were layered  
763 on top of each sucrose gradient, with less than 1.5 mg of protein per gradient. Sucrose gradients  
764 were centrifuged in an SW40 swinging bucket rotor (Beckman) at 256,000 × g for 17 h at 4°C.  
765 After centrifugation, 500 µl fractions were collected from each gradient by puncturing the bottom



766 of each tube and allowing fractions to drip into microcentrifuge tubes. The refractive index of  
767 each fraction was determined using a refractometer (Fisher Scientific) and correlated with a  
768 specific density in  $\text{g ml}^{-1}$  (Price, 1982) to identify outer membrane (OM; 1.17-1.20  $\text{g/ml}$ ) and inner  
769 membrane (IM; 1.13-1.14  $\text{g/ml}$ ) fractions. Sucrose gradient fractions were examined by  
770 immunoblotting as described below.

771

### 772 *Immunoblotting*

773 Whole cell lysates of FTL1678 *trans*-complement were prepared by suspending bacteria (pelleted  
774 at  $7000 \times g$ ) in molecular biology grade water, diluting with SDS-PAGE loading buffer, and  
775 boiling for 10 min. Whole cell lysates, OM fractions, IM fractions, and molecular mass standards  
776 (Precision Plus protein all blue prestained protein standards; BioRad Laboratories) were separated  
777 on a 12.5% polyacrylamide gel, transferred to nitrocellulose, and blots were incubated overnight  
778 in blot block (0.1% (vol/vol) Tween 20 and 2% (wt/vol) bovine serum albumin in PBS) at  $4^{\circ}\text{C}$ .  
779 Immunoblotting was performed using rat polyclonal antiserum specific for either *F. tularensis* OM  
780 protein FopA, *F. tularensis* IM protein SecY (Huntley, 2007) or the Penta-His HRP conjugate  
781 antibody (Qiagen).

782

### 783 *Infections of Mouse Bone Marrow Derived Macrophages (mBMDMs) and J774A.1 cells*

784 Macrophage culture ( $37^{\circ}\text{C}$  with 5%  $\text{CO}_2$  unless otherwise indicated) and infections were  
785 performed as previously described (Wu, 2016), with some modifications. Bone marrow  
786 macrophages were harvested from female C3H/HeN mice. Mice were euthanized by  $\text{CO}_2$   
787 asphyxiation and cervical dislocation. Femurs and tibias of both hind legs were aseptically-  
788 harvested, marrow was flushed from each bone with RPMI-1640 (Hyclone) containing 10% heat-  
789 inactivated fetal bovine serum ([HI-FBS], Atlanta Biologicals) and 30% supernatants from day 7

790 L929 cultures (ATCC). Bone marrow was disrupted by repeated passage through a 23-gauge  
791 needle and cultured for 4 days. Next, cell media was removed and replaced with RPMI containing  
792 10% HI-FBS and 30% supernatant from day 14 L929 cultures, and cells were cultured for 2 days.  
793 Approx. 24 h before infection, media was removed, cells were harvested by scraping and  
794 centrifugation at  $400 \times g$  for 10 min at  $10^{\circ}\text{C}$ , cells were enumerated using a hemocytometer, and  
795 diluted to  $1 \times 10^5$  cells in RPMI containing 10% HI-FBS. J774A.1 cells (ATCC) were cultured in  
796 Dulbecco's Modified Eagle Medium ([DMEM], Gibco) containing 10% HI-FBS. Approx. 24 h  
797 before infection, cells were harvested as described above, seeded into individual wells of 24-well  
798 plates (Corning) at a concentration of  $1 \times 10^5$  cells/well, and incubated overnight. mBMDMs and  
799 J774A.1 cells were infected with a multiplicity of infection (MOI) of 100 bacteria to 1 cell (100:1).  
800 Following infection, cells were centrifuged at  $1,000 \times g$  for 10 min at  $4^{\circ}\text{C}$ , incubated at  $37^{\circ}\text{C}$  with  
801 5%  $\text{CO}_2$  for 1 h, washed  $1 \times$  with RPMI (or DMEM), media containing  $100 \mu\text{g ml}^{-1}$  gentamicin  
802 was added to kill extracellular bacteria, cells were incubated at  $37^{\circ}\text{C}$  with 5%  $\text{CO}_2$  for 1 h, washed  
803  $1 \times$  with RPMI (or DMEM), lysed with 1% saponin for 4 min, serially diluted in PBS, plated onto  
804 sMHA plates, and bacteria were enumerated (entry) after 48h. Alternatively, after gentamicin  
805 treatment and washing, RPMI (or DMEM) containing 10% HI-FBS was added to cells and they  
806 were incubated for 6 or 24 h, lysed, serially-diluted, and plated to determine bacterial numbers.

807

#### 808 *Expression and Purification of Recombinant FTL1678 and FTT0101*

809 *F. tularensis* LVS and SchuS4 genomic DNA were extracted using phenol/chloroform/isoamyl  
810 alcohol (Fisher Bioreagents). *FTL1678* and *FTT0101*, without signal sequences (amino acid  
811 residues 1-29), were PCR-amplified from LVS and SchuS4 genomic DNA, respectively, using  
812 High Fidelity Platinum Taq Polymerase (Life Technologies), and primers 5'*FTL1678\_BamHI* and  
813 3'*FTL1678\_XhoI* and 5'*FTT0101\_BamHI* and 3'*FTT0101\_XhoI*, respectively (Table S7).

814 Amplicons and pPROEX HTb were double-digested with BamHI and XhoI, ligated using T4 DNA  
815 ligase, and transformed into NEB 10- $\beta$  *E. coli*. Plasmids were purified using the Qiagen QIAprep  
816 Spin Miniprep kit and diagnostic PCR was performed to confirm presence and correct size of the  
817 insert. DNA sequencing was performed to confirm insert integrity and plasmid constructs were  
818 transformed into Rosetta DE3 *E. coli* (Millipore) for protein expression. Recombinant proteins  
819 were expressed and purified as previously described (Ren, 2014) with some modifications.  
820 Bacteria were grown in LB-amp to an OD<sub>600</sub> of 0.4, protein expression was induced for 2 h by the  
821 addition of isopropyl  $\beta$ -D-thiogalactopyranoside (IPTG) to a final concentration of 100 mM,  
822 bacteria were pelleted by centrifugation, and frozen overnight at  $-80^{\circ}\text{C}$  to aid in lysis. Cell pellets  
823 were suspended in 10 mM Tris, 500 mM NaCl, and 10 mM imidazole, pH 8.0, sonicated on ice  
824 for 10 min with 30 sec intervals, insoluble material was removed by centrifugation at  $8,000 \times g$ ,  
825 and supernatants were collected for affinity purification over pre-equilibrated Ni-nitrilotriacetic  
826 acid (Ni-NTA) agarose (Qiagen) columns. Eluted recombinant proteins were concentrated in  
827 Amicon Ultra-4 centrifugal filter units with 30-kDa cutoff (Millipore), concentrations were  
828 determined using the DC BCA protein assay (BioRad), and purity was assessed by SDS-PAGE  
829 and Imperial protein staining (Thermo Scientific). An empty vector construct also was expressed  
830 and purified as a control in enzymatic assays.

831

### 832 *Enzymatic Assays for FTL1678/FTT0101 Activity*

833 FTL1678 and FTT0101 recombinant protein activity toward various PG-related compounds were  
834 tested in 50  $\mu\text{l}$  reaction mixtures containing 50 mM Tris-HCl, pH 8.0, 0.1 mM substrate, and  
835 partially purified enzyme stock (10  $\mu\text{l}$  in 1 M NaCl, 10 mM Tris, pH 8.0). Mixtures were incubated  
836 for 30 min to 2 h at  $37^{\circ}\text{C}$  and reactions were stopped by freezing. Substrate and reaction products  
837 were separated by HPLC on an ODS-Hypersil 3  $\mu\text{m}$  particle-size C18 column (250 by 4.6 mm;

838 Thermo Scientific). Elutions were performed with 50 mM sodium phosphate buffer, pH 4.5, with  
839 or without application of a linear gradient of methanol (from 0 to 50% in 50 min), at a flow rate of  
840 0.5 ml/min. Peaks were detected by measuring the absorbance at 207 nm or at 262 nm for UDP-  
841 containing nucleotide precursors. Identification of compounds was based on their retention times,  
842 compared to authentic standards, as well as on their amino acid and amino sugar composition,  
843 determined with a Hitachi model L8800 analyzer (Sciencetec) after hydrolysis of samples in 6 M  
844 HCl for 16 h at 95°C. Enzyme activity was calculated by integration of peaks corresponding to  
845 substrate and product. Amounts of alanine released by the L,D-carboxypeptidase activity also  
846 were determined using an amino acid analyzer. Depending on the substrate used, the amount of  
847 partially purified protein varied from 0.9 to 5 µg per assay and incubation times varied from 30  
848 min to 4 h. To ensure linearity, substrate consumption was < 20% in all cases. Values represent  
849 the means for three independent experiments; the standard deviation was < 10% in all cases.  
850 Specific activities were calculated from the amounts of D-Ala (tetrapeptide substrates) or D-Ala-  
851 D-Ala (pentapeptide substrates) released during the reaction. FTL1678 double and triple active  
852 site mutants were tested in 50 µl reaction mixtures containing 50 mM Tris-HCl, pH 8.0, 0.05 mM  
853 substrate, and partially purified enzyme stock (5-10 µl in 1 M NaCl, 10 mM Tris, pH 8.0).  
854 Reactions were incubated for 18 hours then analyzed by HPLC as described above. Peaks were  
855 detected by measuring absorbance at 207 nm.

856

### 857 *Peptidoglycan Precursors and Muropeptides*

858 UDP-MurNAc-pentapeptide precursors containing either *meso*-diaminopimelic acid (A<sub>2</sub>pm) or L-  
859 lysine were prepared by enzymatic synthesis using purified Mur ligases, and UDP-MurNAc-  
860 tetrapeptides were generated by treatment of the UDP-MurNAc-pentapeptide precursors with  
861 purified *E. coli* PBP5 DD-carboxypeptidase as previously described (Herve, 2007). MurNAc-

862 peptides were obtained by mild acid hydrolysis of UDP-MurNAc-peptides (0.1 M HCl, 100°C, 15  
863 min) and were not reduced and thus purified as a mixture of the two  $\alpha$  and  $\beta$  anomers (Blanot,  
864 1983). Free peptides were prepared by cleavage of MurNAc-peptides with *E. coli* AmiD N-  
865 acetylmuramoyl-L-alanine amidase (Pennartz, 2009). The *E. coli* peptidoglycan polymer was  
866 purified from a  $\Delta lpp$  mutant strain that does not express the Lpp lipoprotein (Leulier, 2003).  
867 GlcNAc-1,6-anhydro-MurNAc-L-Ala- $\gamma$ -D-Glu-*meso*-A<sub>2</sub>pm-D-Ala (TCT) and its dimer (two  
868 cross-linked TCT monomers) were produced by digestion of peptidoglycan with *E. coli* SltY lytic  
869 transglycosylase and the non-anhydro forms of these monomer and dimer were generated by  
870 digestion of the polymer with mutanolysin (Stenbak, 2004). All these compounds were HPLC-  
871 purified and their composition was controlled by amino acid and amino sugar content analysis  
872 and/or by MALDI-TOF mass spectrometry.

873

#### 874 *Statistics*

875 GraphPad Prism6 was used in various statistical analyses, including: differences in antibiotic,  
876 detergent, dye, or lysozyme susceptibility were calculated by one-way ANOVA with multiple  
877 comparisons and the Holm-Sidak post-hoc test; differences in EM measurements were determined  
878 by unpaired t-tests; differences in median time-to-death and percent survival following *F.*  
879 *tularensis* infection of mice were calculated using the log-rank Mantel-Cox test; differences in  
880 pathology scores of *F. tularensis*-infected tissues were calculated by two-way ANOVA with  
881 multiple comparisons and a Tukey post-hoc test. Differences in lung, liver, spleen, and blood  
882 bacterial burdens from infected mice were calculated by one-way ANOVA with multiple  
883 comparisons using R software.

884

885

886 **Acknowledgments**

887 We would like to acknowledge Drs. Joe Dillard and Ryan Schaub (University of Wisconsin-  
888 Madison) for all their help and expertise with peptidoglycan isolation/purification. We would also  
889 like to thank Dr. Erin Gaynor for her generous contribution of *C. jejuni* Pgp2-pGEM plasmid  
890 construct. This work was supported by grant R01 AI093351 from the National Institute of Allergy  
891 and Infectious Disease of the National Institutes of Health (NIAID-NIH) to J.F.H.

892

893

894 **Data Availability Statement**

895 Data that support the findings of this study are available in the supplementary material of this  
896 article.

897

898

899 **References**

900 Blanot, D., Kretsovali A, Abo-Ghalia M, Mengin-Lecreulx D, van Heijenoort J (1983) Synthesis  
901 of analogues of precursors of bacterial peptidoglycan, in Malon, B. a. P. (ed), *Peptides*.  
902 Berlin, Germany: Walter de Gruyter, 311-314.

903 Bouveret, E., Benedetti H, Rigal A, Loret E, Lazdunski C (1999) In vitro characterization of  
904 peptidoglycan-associated lipoprotein (PAL)-peptidoglycan and PAL-TolB interactions. *J*  
905 *Bacteriol*, 181(20), 6306-11.

906 Braun, V. (1975) Covalent lipoprotein from the outer membrane of *Escherichia coli*. *Biochim*  
907 *Biophys Acta*, 415(3), 335-77.

908 Braun, V. & Hantke, K. (2019) Lipoproteins: Structure, Function, Biosynthesis. *Subcell*  
909 *Biochem*, 92, 39-77.

- 910 Braun, V., Rehn K (1969) Chemical characterization, spatial distribution and function of a  
911 lipoprotein (murein-lipoprotein) of the *E. coli* cell wall. The specific effect of trypsin on  
912 the membrane structure. *Eur J Biochem*, 10(3), 426-38.
- 913 Braun, V. & Rehn, K. (1969) Chemical characterization, spatial distribution and function of a  
914 lipoprotein (murein-lipoprotein) of the *E. coli* cell wall. The specific effect of trypsin on  
915 the membrane structure. *Eur J Biochem*, 10(3), 426-38.
- 916 Chaput, C., Ecobichon C, Pouradier N, Rousselle JC, Namane A, Boneca IG (2016) Role of the  
917 N-Acetylmuramoyl-l-Alanyl Amidase, AmiA, of *Helicobacter pylori* in Peptidoglycan  
918 Metabolism, Daughter Cell Separation, and Virulence. *Microb Drug Resist*, 22(6), 477-  
919 86.
- 920 Clavel, T., Germon P, Vianney A, Portalier R, Lazzaroni JC (1998) TolB protein of *Escherichia*  
921 *coli* K-12 interacts with the outer membrane peptidoglycan-associated proteins Pal, Lpp  
922 and OmpA. *Mol Microbiol*, 29(1), 359-67.
- 923 Das, D., Herve M, Elsliger MA, Kadam RU, Grant JC, Chiu HJ, Knuth MW, Klock HE, Miller  
924 MD, Godzik A, Lesley SA, Deacon AM, Mengin-Lecreulx D, Wilson IA (2013)  
925 Structure and function of a novel LD-carboxypeptidase a involved in peptidoglycan  
926 recycling. *J Bacteriol*, 195(24), 5555-66.
- 927 De Pascalis, R., Hahn A, Brook HM, Ryden P, Donart N, Mittereder L, Frey B, Wu TH, Elkins  
928 KL (2018) A panel of correlates predicts vaccine-induced protection of rats against  
929 respiratory challenge with virulent *Francisella tularensis*. *PLoS One*, 13(5), e0198140.
- 930 de Pedro, M., Cava F (2015) Structural constraints and dynamics of bacterial cell wall  
931 architecture. *Front Microbiol*, 6, 449.
- 932 den Blaauwen, T., de Pedro MA, Nguyen-Disteche M, Ayala JA (2008) Morphogenesis of rod-  
933 shaped sacculi. *FEMS Microbiol Rev*, 32(2), 321-44.

- 934 Dennis, D., Inglesby TV, Henderson DA, Bartlett JG, Ascher MS, Eitzen E, Fine AD,  
935 Friedlander AM, Hauer J, Layton M, Lillibridge SR, McDade JE, Osterholm MT,  
936 O'Toole T, Parker G, Perl TM, Russell PK, and Tonat K (2001) Tularemia as a biological  
937 weapon: medical and public health management. *JAMA*, 285(21), 2763-73.
- 938 Denome, S., Elf PK, Henderson TA, Nelson DE, Young KD (1999) *Escherichia coli* mutants  
939 lacking all possible combinations of eight penicillin binding proteins: viability,  
940 characteristics, and implications for peptidoglycan synthesis. *J Bacteriol*, 181(13), 3981-  
941 93.
- 942 Dhar, S., Kumari H, Balasubramanian D, Mathee K. (2018) Cell-wall recycling and synthesis in  
943 *Escherichia coli* and *Pseudomonas aeruginosa* - their role in the development of  
944 resistance. *J Med Microbiol*, 67(1), 1-21.
- 945 Ellis, J., Oyston PC, Green M, Titball RW (2002) Tularemia. *Clin Microbiol Rev*, 15(4), 631-46.
- 946 Frirdich, E., Biboy J, Adams C, Lee J, Ellermeier J, Giolda LD, Dirita VJ, Girardin SE, Vollmer  
947 W, Gaynor EC (2012) Peptidoglycan-modifying enzyme Pgp1 is required for helical cell  
948 shape and pathogenicity traits in *Campylobacter jejuni*. *PLoS Pathog*, 8(3), e1002602.
- 949 Frirdich, E., Vermeulen J, Biboy J, Soares F, Taveirne ME, Johnson JG, DiRita VJ, Girardin SE,  
950 Vollmer W, Gaynor EC (2014) Peptidoglycan LD-carboxypeptidase Pgp2 influences  
951 *Campylobacter jejuni* helical cell shape and pathogenic properties and provides the  
952 substrate for the DL-carboxypeptidase Pgp1. *J Biol Chem*, 289(12), 8007-18.
- 953 Gallagher, L., McKevitt M, Ramage ER, Manoil C (2008) Genetic dissection of the *Francisella*  
954 *novicida* restriction barrier. *J Bacteriol*, 190(23), 7830-7.
- 955 Glauner, B., Holtje JV, Schwarz U (1988) The composition of the murein of *Escherichia coli*. *J*  
956 *Biol Chem*, 263(21), 10088-95.



- 957 Guinane, C., Cotter PD, Ross RP, Hill C (2006) Contribution of penicillin-binding protein  
958 homologs to antibiotic resistance, cell morphology, and virulence of *Listeria*  
959 *monocytogenes* EGDe. *Antimicrob Agents Chemother*, 50(8), 2824-8.
- 960 Hall, J., Woolard MD, Gunn BM, Craven RR, Taft-Benz S, Frelinger JA, Kawula TH (2008)  
961 Infected-host-cell repertoire and cellular response in the lung following inhalation of  
962 *Francisella tularensis* Schu S4, LVS, or U112. *Infect Immun*, 76(12), 5843-52.
- 963 Heidrich, C., Templin MF, Ursinus A, Merdanovic M, Berger J, Schwarz H, de Pedro MA,  
964 Holtje JV (2001) Involvement of N-acetylmuramyl-L-alanine amidases in cell separation  
965 and antibiotic-induced autolysis of *Escherichia coli*. *Mol Microbiol*, 41(1), 167-78.
- 966 Heidrich, C., Ursinus A, Berger J, Schwarz H, Holtje JV (2002) Effects of multiple deletions of  
967 murein hydrolases on viability, septum cleavage, and sensitivity to large toxic molecules  
968 in *Escherichia coli*. *J Bacteriol*, 184(22), 6093-9.
- 969 Herve, M., Boniface A, Gobec S, Blanot D, Mengin-Lecreulx D (2007) Biochemical  
970 characterization and physiological properties of *Escherichia coli* UDP-N-  
971 acetylmuramate:L-alanyl-gamma-D-glutamyl-meso-diaminopimelate ligase. *J Bacteriol*,  
972 189(11), 3987-95.
- 973 Holtje, J. (1998) Growth of the stress-bearing and shape-maintaining murein sacculus of  
974 *Escherichia coli*. *Microbiol Mol Biol Rev*, 62(1), 181-203.
- 975 Huntley, J., Conley PG, Hagman KE, Norgard MV (2007) Characterization of *Francisella*  
976 *tularensis* outer membrane proteins. *J Bacteriol*, 189(2), 561-74.
- 977 Huntley, J., Conley PG, Rasko DA, Hagman KE, Apicella MA, Norgard MV (2008) Native  
978 outer membrane proteins protect mice against pulmonary challenge with virulent type A  
979 *Francisella tularensis*. *Infect Immun*, 76(8), 3664-71.

- 980 Jenkins, C., Wallis R, Allcock N, Barnes KB, Richards MI, Auty JM, Galyov EE, Harding SV,  
981 Mukamolova GV (2019) The lytic transglycosylase, LtgG, controls cell morphology and  
982 virulence in *Burkholderia pseudomallei*. *Sci Rep*, 9(1), 11060.
- 983 Johnson, J., Fisher JF, Mobashery S (2013) Bacterial cell-wall recycling. *Ann N Y Acad Sci*,  
984 1277, 54-75.
- 985 Jones, A. S., Austerberry, J. I., Dajani, R., Warwicker, J., Curtis, R., Derrick, J. P. & Robinson,  
986 C. (2016) Proofreading of substrate structure by the Twin-Arginine Translocase is highly  
987 dependent on substrate conformational flexibility but surprisingly tolerant of surface  
988 charge and hydrophobicity changes. *Biochim Biophys Acta*, 1863(12), 3116-3124.
- 989 Jones, C., Napier BA, Sampson TR, Llewellyn AC, Schroeder MR, Weiss DS (2012) Subversion  
990 of host recognition and defense systems by *Francisella* spp. *Microbiol Mol Biol Rev*,  
991 76(2), 383-404.
- 992 Juan, C., Torrens G, Barcelo IM, Oliver A (2018) Interplay between Peptidoglycan Biology and  
993 Virulence in Gram-Negative Pathogens. *Microbiol Mol Biol Rev*, 82(4), e00033-18.
- 994 Keim, P., Johansson A, Wagner DM (2007) Molecular epidemiology, evolution, and ecology of  
995 *Francisella*. *Ann N Y Acad Sci*, 1105, 30-66.
- 996 Kijek, T., Mou S, Bachert BA, Kuehl KA, Williams JA, Daye SP, Worsham PL, Bozue JA  
997 (2019) The D-alanyl-d-alanine carboxypeptidase enzyme is essential for virulence in the  
998 Schu S4 strain of *Francisella tularensis* and a *dacD* mutant is able to provide protection  
999 against a pneumonic challenge. *Microb Pathog*, 137, 103742.
- 1000 Kingry, L., Petersen JM (2014) Comparative review of *Francisella tularensis* and *Francisella*  
1001 *novicida*. *Front Cell Infect Microbiol*, 4, 35.

- 1002 Knodler, L. A., Vallance, B. A., Hensel, M., Jackel, D., Finlay, B. B. & Steele-Mortimer, O.  
1003 (2003) *Salmonella* type III effectors PipB and PipB2 are targeted to detergent-resistant  
1004 microdomains on internal host cell membranes. *Mol Microbiol*, 49(3), 685-704.
- 1005 Korza, H., Bochtler M (2005) *Pseudomonas aeruginosa* LD-carboxypeptidase, a serine peptidase  
1006 with a Ser-His-Glu triad and a nucleophilic elbow. *J Biol Chem*, 280(49), 40802-12.
- 1007 Leduc, M., Ishidate K, Shakibai N, Rothfield L (1992) Interactions of *Escherichia coli*  
1008 membrane lipoproteins with the murein sacculus. *J Bacteriol*, 174(24), 7982-8.
- 1009 Lenz, J., Hackett KT, Dillard JP (2017) A Single Dual-Function Enzyme Controls the Production  
1010 of Inflammatory NOD Agonist Peptidoglycan Fragments by *Neisseria gonorrhoeae*.  
1011 *MBio*, 8(5), e01464-17.
- 1012 Lenz, J. D., Hackett, K. T. & Dillard, J. P. (2017) A Single Dual-Function Enzyme Controls the  
1013 Production of Inflammatory NOD Agonist Peptidoglycan Fragments by *Neisseria*  
1014 *gonorrhoeae*. *MBio*, 8(5).
- 1015 Leulier, F., Parquet C, Pili-Floury S, Ryu JH, Caroff M, Lee WJ, Mengin-Lecreulx D, Lemaitre  
1016 B (2003) The *Drosophila* immune system detects bacteria through specific peptidoglycan  
1017 recognition. *Nat Immunol*, 4(5), 478-84.
- 1018 Lund, P., Tramonti, A. & De Biase, D. (2014) Coping with low pH: molecular strategies in  
1019 neutralophilic bacteria. *FEMS Microbiol Rev*, 38(6), 1091-125.
- 1020 Maier, T., Havig A, Casey M, Nano FE, Frank DW, Zahrt TC (2004) Construction and  
1021 characterization of a highly efficient *Francisella* shuttle plasmid. *Appl Environ*  
1022 *Microbiol*, 70(12), 7511-9.
- 1023 Mengin-Lecreulx, D. & Lemaitre, B. (2005) Structure and metabolism of peptidoglycan and  
1024 molecular requirements allowing its detection by the *Drosophila* innate immune system.  
1025 *J Endotoxin Res*, 11(2), 105-11.

- 1026 Metz, R., Henning S, Hammes WP (1986a) LD-carboxypeptidase activity in *Escherichia coli*. I.  
1027 The LD-carboxypeptidase activity in ether treated cells. *Arch Microbiol*, 144(2), 175-80.
- 1028 Metz, R., Henning S, Hammes WP (1986b) LD-carboxypeptidase activity in *Escherichia coli*. II.  
1029 Isolation, purification and characterization of the enzyme from *E. coli* K 12. *Arch*  
1030 *Microbiol*, 144(2), 181-6.
- 1031 Meyer, K., Addy C, Akashi S, Roper DI, Tame JRH (2018) The crystal structure and oligomeric  
1032 form of *Escherichia coli* L,D-carboxypeptidase A. *Biochem Biophys Res Commun*,  
1033 499(3), 594-599.
- 1034 Minor, P. (2015) Live attenuated vaccines: Historical successes and current challenges. *Virology*,  
1035 479-480, 379-92.
- 1036 Mishra, S. & Imlay, J. (2012) Why do bacteria use so many enzymes to scavenge hydrogen  
1037 peroxide? *Arch Biochem Biophys*, 525(2), 145-60.
- 1038 Nelson, D., Young KD (2000) Penicillin binding protein 5 affects cell diameter, contour, and  
1039 morphology of *Escherichia coli*. *J Bacteriol*, 182(6), 1714-21.
- 1040 Park, J., Uehara T (2008) How bacteria consume their own exoskeletons (turnover and recycling  
1041 of cell wall peptidoglycan). *Microbiol Mol Biol Rev*, 72(2), 211-27.
- 1042 Pazos, M. & Peters, K. (2019) Peptidoglycan. *Subcell Biochem*, 92, 127-168.
- 1043 Pennartz, A., Genereux C, Parquet C, Mengin-Lecreulx D, Joris B (2009) Substrate-induced  
1044 inactivation of the *Escherichia coli* AmiD N-acetylmuramoyl-L-alanine amidase  
1045 highlights a new strategy to inhibit this class of enzyme. *Antimicrob Agents Chemother*,  
1046 53(7), 2991-7.
- 1047 Petrosino, J. F., Xiang, Q., Karpathy, S. E., Jiang, H., Yerrapragada, S., Liu, Y., Gioia, J.,  
1048 Hemphill, L., Gonzalez, A., Raghavan, T. M., Uzman, A., Fox, G. E., Highlander, S.,  
1049 Reichard, M., Morton, R. J., Clinkenbeard, K. D. & Weinstock, G. M. (2006)

- 1050 Chromosome rearrangement and diversification of *Francisella tularensis* revealed by the  
1051 type B (OSU18) genome sequence. *J Bacteriol*, 188(19), 6977-85.
- 1052 Price, C. (1982) Centrifugation in density gradients. *Academic Press*, 335-343.
- 1053 Priyadarshini, R., de Pedro MA, Young KD (2007) Role of peptidoglycan amidases in the  
1054 development and morphology of the division septum in *Escherichia coli*. *J Bacteriol*,  
1055 189(14), 5334-47.
- 1056 Priyadarshini, R., Popham DL, Young KD (2006) Daughter cell separation by penicillin-binding  
1057 proteins and peptidoglycan amidases in *Escherichia coli*. *J Bacteriol*, 188(15), 5345-55.
- 1058 Qin, A., Scott DW, Thompson JA, Mann BJ (2009) Identification of an essential *Francisella*  
1059 *tularensis* subsp. *tularensis* virulence factor. *Infect Immun*, 77(1), 152-61.
- 1060 Ray, K., Marteyn B, Sansonetti PJ, Tang CM (2009) Life on the inside: the intracellular lifestyle  
1061 of cytosolic bacteria. *Nat Rev Microbiol*, 7(5), 333-40.
- 1062 Ren, G., Champion MM, Huntley JF (2014) Identification of disulfide bond isomerase substrates  
1063 reveals bacterial virulence factors. *Mol Microbiol*, 94(4), 926-44.
- 1064 Roberts, L., Powell DA, Frelinger JA (2018) Adaptive Immunity to *Francisella tularensis* and  
1065 Considerations for Vaccine Development. *Front Cell Infect Microbiol*, 8, 115.
- 1066 Robertson, G., Child R, Ingle C, Celli J, Norgard MV (2013) IglE is an outer membrane-  
1067 associated lipoprotein essential for intracellular survival and murine virulence of type A  
1068 *Francisella tularensis*. *Infect Immun*, 81(11), 4026-40.
- 1069 Russo, T., MacDonald U, Beanan JM, Olson R, MacDonald IJ, Sauberan SL, Luke NR, Schultz  
1070 LW, Umland TC (2009) Penicillin-binding protein 7/8 contributes to the survival of  
1071 *Acinetobacter baumannii* in vitro and in vivo. *J Infect Dis*, 199(4), 513-21.
- 1072 Scheurwater, E., Reid CW, Clarke AJ (2008) Lytic transglycosylases: bacterial space-making  
1073 autolysins. *Int J Biochem Cell Biol*, 40(4), 586-91.

- 1074 Silhavy, T. J., Kahne, D. & Walker, S. (2010) The bacterial cell envelope. *Cold Spring Harb*  
1075 *Perspect Biol*, 2(5), a000414.
- 1076 Sjostedt, A. (2007) Tularemia: history, epidemiology, pathogen physiology, and clinical  
1077 manifestations. *Ann N Y Acad Sci*, 1105, 1-29.
- 1078 Spidlova, P., Stojkova P, Dankova V, Senitkova I, Santic M, Pinkas D, Philimonenko V, Stulik J  
1079 (2018) *Francisella tularensis* D-Ala D-Ala Carboxypeptidase DacD Is Involved in  
1080 Intracellular Replication and It Is Necessary for Bacterial Cell Wall Integrity. *Front Cell*  
1081 *Infect Microbiol*, 8, 111.
- 1082 Steiner, D., Furuya Y, Jordan MB, Metzger DW (2017) Protective Role for Macrophages in  
1083 Respiratory *Francisella tularensis* Infection. *Infect Immun*, 85(6).
- 1084 Stenbak, C., Ryu JH, Leulier F, Pili-Floury S, Parquet C, Herve M, Chaput C, Boneca IG, Lee  
1085 WJ, Lemaitre B, Mengin-Lecreulx D (2004) Peptidoglycan molecular requirements  
1086 allowing detection by the *Drosophila* immune deficiency pathway. *J Immunol*, 173(12),  
1087 7339-48.
- 1088 Sycuro, L., Pincus Z, Gutierrez KD, Biboy J, Stern CA, Vollmer W, Salama NR (2010)  
1089 Peptidoglycan crosslinking relaxation promotes *Helicobacter pylori's* helical shape and  
1090 stomach colonization. *Cell*, 141(5), 822-33.
- 1091 Sycuro, L., Rule CS, Petersen TW, Wyckoff TJ, Sessler T, Nagarkar DB, Khalid F, Pincus Z,  
1092 Biboy J, Vollmer W, Salama NR (2013) Flow cytometry-based enrichment for cell shape  
1093 mutants identifies multiple genes that influence *Helicobacter pylori* morphology. *Mol*  
1094 *Microbiol*, 90(4), 869-83.
- 1095 Templin, M., Ursinus A, Holtje JV (1999) A defect in cell wall recycling triggers autolysis  
1096 during the stationary growth phase of *Escherichia coli*. *EMBO J*, 18(15), 4108-17.

- 1097 Typas, A., Banzhaf M, Gross CA, Vollmer W (2011) From the regulation of peptidoglycan  
1098 synthesis to bacterial growth and morphology. *Nat Rev Microbiol*, 10(2), 123-36.
- 1099 Ursinus, A., Steinhaus H, Holtje JV (1992) Purification of a nocardicin A-sensitive LD-  
1100 carboxypeptidase from *Escherichia coli* by affinity chromatography. *J Bacteriol*, 174(2),  
1101 441-6.
- 1102 van Heijenoort, J. (2011) Peptidoglycan hydrolases of *Escherichia coli*. *Microbiol Mol Biol Rev*,  
1103 75(4), 636-63.
- 1104 Vollmer, W. & Bertsche, U. (2008) Murein (peptidoglycan) structure, architecture and  
1105 biosynthesis in *Escherichia coli*. *Biochim Biophys Acta*, 1778(9), 1714-34.
- 1106 Walburger, A., Lazdunski C, Corda Y (2002) The Tol/Pal system function requires an interaction  
1107 between the C-terminal domain of TolA and the N-terminal domain of TolB. *Mol*  
1108 *Microbiol*, 44(3), 695-708.
- 1109 Wu, X., Ren G, Gunning WT 3rd, Weaver DA, Kalinoski AL, Khuder SA, Huntley JF (2016)  
1110 FmvB: A *Francisella tularensis* Magnesium-Responsive Outer Membrane Protein that  
1111 Plays a Role in Virulence. *PLoS One*, 11(8), e0160977.
- 1112 Wu, X., Ren G, Huntley JF (2015) Generating Isogenic Deletions (Knockouts) in *Francisella*  
1113 *tularensis*, a Highly-infectious and Fastidious Gram-negative Bacterium. *Bio Protoc*,  
1114 5(12), e1500.
- 1115

1116 **Table 1.** Specific Activity and Substrate Specificity of FTL1678 and FTT0101 Enzymes

| Substrate                                                                                                      | Specific Activity (nmol/min/mg of protein) <sup>a</sup> |                           |
|----------------------------------------------------------------------------------------------------------------|---------------------------------------------------------|---------------------------|
|                                                                                                                | FTL1678                                                 | FTT0101                   |
| <b>A<sub>2</sub>pm-containing substrates</b>                                                                   |                                                         |                           |
| GlcNAc-anhydroMurNAc-L-Ala- $\gamma$ -D-Glu- <i>meso</i> -A <sub>2</sub> pm-D-Ala (TCT)                        | 21.5                                                    | 29.0                      |
| GlcNAc-MurNAc-L-Ala- $\gamma$ -D-Glu- <i>meso</i> -A <sub>2</sub> pm-D-Ala (PG monomer)                        | 15.6                                                    | 24.2                      |
| TCT dimer                                                                                                      | 7.7                                                     | 11.8                      |
| MurNAc-L-Ala- $\gamma$ -D-Glu- <i>meso</i> -A <sub>2</sub> pm-D-Ala                                            | 5.8                                                     | 7.8                       |
| UDP-MurNAc-L-Ala- $\gamma$ -D-Glu- <i>meso</i> -A <sub>2</sub> pm-D-Ala                                        | 4.6                                                     | 6.3                       |
| L-Ala- $\gamma$ -D-Glu- <i>meso</i> -A <sub>2</sub> pm-D-Ala (free tetrapeptide)                               | 3.4                                                     | 8.0                       |
| MurNAc-L-Ala- $\gamma$ -D-Glu- <i>meso</i> -A <sub>2</sub> pm-D-Ala-D-Ala (pentapeptide)                       | 9.8                                                     | 6.2                       |
| UDP-MurNAc-L-Ala- $\gamma$ -D-Glu- <i>meso</i> -A <sub>2</sub> pm-D-Ala-D-Ala (pentapeptide)                   | 5.9                                                     | 6.4                       |
| <b>L-Lysine-containing substrates</b>                                                                          |                                                         |                           |
| MurNAc-L-Ala- $\gamma$ -D-Glu-L-Lys-D-Ala                                                                      | 1.3                                                     | 2.1                       |
| L-Ala- $\gamma$ -D-Glu-L-Lys-D-Ala                                                                             | 0.7                                                     | 2.1                       |
| UDP-MurNAc-L-Ala- $\gamma$ -D-Glu-L-Lys-D-Ala-D-Ala                                                            | 1.2                                                     | 1.7                       |
| <b>Other</b>                                                                                                   |                                                         |                           |
| GlcNAc-MurNAc-L-Ala- $\gamma$ -D-Glu- <i>meso</i> -A <sub>2</sub> pm(NH <sub>2</sub> )-D-Ala                   |                                                         | Very low (<0.5)           |
| GlcNAc-MurNAc-L-Ala- $\gamma$ -D-Glu(NH <sub>2</sub> )- <i>meso</i> -A <sub>2</sub> pm-D-Ala                   |                                                         | Not detected <sup>b</sup> |
| GlcNAc-MurNAc-L-Ala- $\gamma$ -D-Glu(NH <sub>2</sub> )- <i>meso</i> -A <sub>2</sub> pm(NH <sub>2</sub> )-D-Ala |                                                         | Not detected <sup>b</sup> |
| Peptidoglycan polymer                                                                                          |                                                         | Not detected <sup>b</sup> |

1117

1118 <sup>a</sup> Standard enzyme assay conditions are described in the Materials and Methods.1119 <sup>b</sup> Not detected indicates that no release of alanine was detected.



1120 **Table 2.** Sensitivity of WT and  $\Delta FTL1678$  to Antibiotics, Detergents, and Dyes

| Compound         | Concentration ( $\mu\text{g}/\text{disk}$ ) | Average Zone of Inhibition, mm (mean $\pm$ SD) <sup>a</sup> |                     |
|------------------|---------------------------------------------|-------------------------------------------------------------|---------------------|
|                  |                                             | WT                                                          | $\Delta FTL1678$    |
| Gentamicin       | 4                                           | 2.50 $\pm$ 0.10                                             | 0.93 $\pm$ 0.15 (R) |
| Tetracycline     | 5                                           | 1.83 $\pm$ 0.06                                             | 0.80 $\pm$ 0.00 (R) |
| Chloramphenicol  | 5                                           | 3.37 $\pm$ 0.12                                             | 1.00 $\pm$ 0.00 (R) |
| Ciprofloxacin    | 5                                           | 4.73 $\pm$ 0.23                                             | 1.90 $\pm$ 0.10 (R) |
| Ampicillin       | 200                                         | 2.57 $\pm$ 0.12                                             | 3.53 $\pm$ 0.15 (S) |
| Vancomycin       | 20                                          | 1.27 $\pm$ 0.21                                             | 2.60 $\pm$ 0.10 (S) |
| Bacitracin       | 182                                         | 1.10 $\pm$ 0.10                                             | 1.20 $\pm$ 0.10     |
| Polymyxin B      | 100                                         | 0.70 $\pm$ 0.00                                             | 0.70 $\pm$ 0.00     |
| Lysozyme         | 1000                                        | 0.70 $\pm$ 0.00                                             | 1.67 $\pm$ 0.06 (S) |
| Ethidium Bromide | 5                                           | 2.73 $\pm$ 0.15                                             | 0.80 $\pm$ 0.00 (R) |
| Triton-X100      | 750                                         | 3.40 $\pm$ 0.27                                             | 2.63 $\pm$ 0.06 (R) |
| SDS              | 1000                                        | 1.20 $\pm$ 0.10                                             | 1.80 $\pm$ 0.00 (S) |
| CTAB             | 50                                          | 0.73 $\pm$ 0.06                                             | 0.80 $\pm$ 0.10     |
| CHAPS            | 50                                          | 0.70 $\pm$ 0.00                                             | 0.70 $\pm$ 0.00     |

1122  
 1123 <sup>a</sup> (R) indicates  $\Delta FTL1678$  is significantly more resistant than WT by one-way ANOVA ( $P < 0.05$ )

1124 <sup>a</sup> (S) indicates  $\Delta FTL1678$  is significantly more sensitive than WT by one-way ANOVA ( $P < 0.05$ )

1125 **Figure 1. Amino acid alignment of bacterial L,D-carboxypeptidases.** Clustal Omega amino  
1126 acid alignment of *E. coli* LdcA (BAA36050.1), *P. aeruginosa* LdcA (Q9HTZ1), *N. gonorrhoeae*  
1127 LdcA (YP\_208343.1), *F. tularensis* Type B FTL1678, and *F. tularensis* Type A FTT0101, and *C.*  
1128 *jejuni* Pgp2 (WP\_002856863). Percent identities (pid), compared to *E. coli* LdcA, are indicated.  
1129 Black shading indicates similar residues. Red shading indicates the catalytic triad.

1130

1131 **Figure 2. FTL1678 is OM-associated.** Spheroplasting, osmotic lysis, and sucrose density  
1132 gradient centrifugation were performed to separate inner membranes (IM) and outer membranes  
1133 (OM) from *F. tularensis*  $\Delta$ FTL1678 *trans*-complemented with a 6 $\times$  histidine-tagged FTL1678.  
1134 Whole-cell lysates (WCL), OM fractions, and IM fractions were separated by SDS-PAGE,  
1135 transferred to nitrocellulose, and immunoblotting was performed using antisera specific for the  
1136 OM control protein FopA ( $\alpha$ FopA), IM control protein SecY ( $\alpha$ SecY), or histidine-tagged  
1137 FTL1678.

1138

1139 **Figure 3. FTL1678 controls bacterial morphology.** Electron micrograph images of: (A) Wild-  
1140 type LVS or (B)  $\Delta$ FTL1678 grown in sMHB to OD<sub>600</sub> of 0.4. Scale bars represent 100 nm; (C)  
1141 Outer membrane thickness measurements (nm) were measured for WT and  $\Delta$ FTL1678, n=50; (D)  
1142 Cell width measurements (nm) for WT and  $\Delta$ FTL1678, n=175. \*\*\*\* indicates  $P < 0.0001$ .

1143

1144 **Figure 4. Deletion of FTL1678 increases resistance to stressors.** WT and  $\Delta$ FTL1678 were  
1145 grown in 75 ml sMHB at: (A) 37°C, (B) sMHB at 40°C, (C) sMHB + 60  $\mu$ M CuCl<sub>2</sub>, (D) sMHB +  
1146 5 mM H<sub>2</sub>O<sub>2</sub>, (E) sMHB + 5% NaCl, or (F) sMHB at pH 5.5. Bacteria were grown for 24 hours  
1147 and OD<sub>600</sub> measurements were recorded every 4 hours.

1148 **Figure 5.  $\Delta$ FTL1678 is fully-attenuated in a mouse pulmonary infection model.** (A) Groups  
1149 of 5 C3H/HeN mice were intranasally-infected with  $10^5$  CFU of either wild-type WT,  $\Delta$ FTL1678,  
1150 or  $\Delta$ FTL1678 *trans*-complemented with FTL1678 [FTL1678 compl]. Animal health was  
1151 monitored daily through day 21 post-infection. \*\*\*\* indicates  $P<0.0001$ ; (B) Lungs, livers,  
1152 spleens, and blood were aseptically harvested from mice infected with  $10^4$  CFU of either WT or  
1153  $\Delta$ FTL1678 on days 2 and 5 post-infection and plated to enumerate bacterial numbers. \* indicates  
1154  $P<0.01$ ; (C) Groups of 5 C3H/HeN mice were intranasally-infected with  $10^5$  CFU of either LVS,  
1155  $\Delta$ FTL1678, FTL1678 *trans*-complement [FTL1678 compl], or *C. jejuni* Pgp2 *trans*-complement  
1156 [Pgp2 compl]. Animal health was monitored through day 21 post-infection. \*\* indicates  $P<0.01$ .  
1157

1158 **Figure 6. FTL1678 is required for *F. tularensis* replication in macrophages.** (A) J774A.1  
1159 macrophages or mouse bone marrow-derived macrophages (mBMDMs) were infected with WT  
1160 or  $\Delta$ FTL1678 at an MOI of 100:1 and bacterial numbers were enumerated at entry (0 h), 6 h, and  
1161 24 h post-infection. (B) Fold change in bacterial numbers from 6 to 24 h post-infection was  
1162 calculated. \* indicates  $P<0.01$ .  
1163

1164 **Figure 7.  $\Delta$ FTL1678 protects against fully-virulent Type A *F. tularensis* SchuS4.** (A) Groups  
1165 of 5 C3H/HeN mice were intranasally infected with either  $10^5$  CFU WT or  $10^5$ ,  $10^7$ , or  $10^9$  CFU  
1166  $\Delta$ FTL1678. On day 29 post-infection, mice were boosted with  $10^9$  CFU  $\Delta$ FTL1678 and animal  
1167 health was monitored daily through day 50 post-infection. \*\*\*  $P<0.001$ ; (B) Mice from A were  
1168 intranasally-challenged with 120 CFU of wild-type SchuS4 [BSL3;  $6\times$  LD50]. Animal health was  
1169 monitored daily through day 26 post-infection. \* indicates  $P<0.001$ .  
1170

1171 **Figure 8.  $\Delta FTL1678$  does not induce tissue damage.** (A) Hematoxylin and eosin (H&E)-  
1172 stained lungs, livers, and spleens were examined from either uninfected, *F. tularensis* WT LVS-,  
1173 or  $\Delta FTL1678$ -infected mice at 10 $\times$  objective. (B) Tissues were graded on a scale of 0 to 4, with 4  
1174 being the most severe. \* indicates  $P < 0.05$ .

1175

1176 **Figure 9. Model of *F. tularensis* peptidoglycan synthesis and recycling pathways.**

1177 Bioinformatic analyses were used to predict proteins that may be involved in peptidoglycan  
1178 synthesis and recycling in *F. tularensis*. *F. tularensis* LVS gene locus tags are indicated, with *E.*  
1179 *coli* or Gram-negative ortholog protein names. OM, outer membrane. IM, inner membrane.  
1180 GlcNAc, N-Acetylglucosamine. MurNAc, N-Acetylmuramic acid. Pal, OM-localized  
1181 peptidoglycan-associated lipoprotein. TolB, periplasmic protein that interacts with Pal and  
1182 peptidoglycan. HMM PBP, high molecular weight penicillin binding protein. LMM PBP, low  
1183 molecular weight penicillin binding protein.

1184

1185 **Supporting Information**

1186

1187 **Table S1.** Bioinformatic analyses of FTL1678 localization

1188

1189 **Table S2.** Endopeptidase activity of FTL1678

1190

1191 **Table S3.** Sensitivity of WT *F. tularensis* SchuS4 and  $\Delta FTT0101$  to antibiotics, detergents, and  
1192 dyes

1193

1194 **Table S4.** Specific activity of FTL1678, FTL1678 double mutants, and FTL1678 triple mutants  
1195 to the TCT monomer

1196

1197 **Table S5.** Sensitivity of WT LVS,  $\Delta$ FTL1678, FTL1678 trans-complement, and Pgp2 trans-  
1198 complement to antibiotics, detergents, and dyes

1199

1200 **Table S6.** Bacterial strains and plasmids used in this study

1201

1202 **Table S7.** Primers used in this study

1203

1204 **Figure S1. FTL1678 contains a putative L,D-carboxypeptidase domain.** NCBI Conserved  
1205 Domain search results for *F. tularensis* FTL1678.

1206

1207 **Figure S2. *F. tularensis* TolB is OM-localized.** Spheroplasting, osmotic lysis, and sucrose  
1208 density gradient centrifugation were performed to separate inner membranes (IM) and outer

1209 membranes (OM) from *F. tularensis*  $\Delta$ FTL1678 *trans*-complemented with a 6x histidine-tagged  
1210 FTL1678. Whole-cell lysates (WCL), OM fractions, and IM fractions were separated by SDS-  
1211 PAGE, transferred to nitrocellulose, and immunoblotting was performed using antisera specific  
1212 for the periplasmic protein TolB ( $\alpha$ TolB).

1213

1214 **Figure S3.  $\Delta$ FTL1678 does not have a growth defect.** WT and  $\Delta$ FTL1678 were grown in  
1215 sMHB for 24 hours at 37°C. Samples were taken every 4 hours for (A) OD600 measurements  
1216 and (B) CFU enumeration following serial-dilution and plating.

1217

1218 **Figure S4.  $\Delta$ FTL1678 has septation defects.** Transmission electron micrograph images of  
1219  $\Delta$ FTL1678 showing aberrant septal formation and reduced ability to separate cells. Images taken  
1220 at: (A) 49,000 $\times$ , scale bar represents 200 nm; and (B) 6,800 $\times$ , scale bar represents 2  $\mu$ m. In  
1221 (A), red arrows point to formed septa that have not separated in  $\Delta$ FTL1678 and white arrows  
1222 point to new septa that are forming in  $\Delta$ FTL1678. Experiments were performed twice to confirm  
1223 reproducibility, with two bacterial preparations fixed, stained, embedded, sectioned, and  
1224 visualized per experiment. Representative images shown.

1225

1226 **Figure S5. FTT0101 is not required for *F. tularensis* Type A strain SchuS4 virulence.**  
1227 C3H/HeN mice were intranasally infected with either 80 CFU SchuS4 (n=3 mice) or 12 CFU  
1228  $\Delta$ FTT0101 (n=5 mice).

1229

1230 **Figure S6. LdcA catalytic triad is not essential for *F. tularensis* virulence.** Groups of 5  
1231 C3H/HeN mice were intranasally-infected with 10<sup>5</sup> CFU of either *F. tularensis* WT LVS,  
1232  $\Delta$ FTL1678,  $\Delta$ FTL1678 *trans*-complemented with FTL1678 (FTL1678 compl),  $\Delta$ FTL1678 *trans*-

1233 complemented with S134A (S134A),  $\Delta FTL1678$  *trans*-complemented with E239A (E239A), or  
1234  $\Delta FTL1678$  *trans*-complemented with H308A (H308A). Animal health was monitored daily  
1235 through day 21 post-infection. \*\*  $P < 0.01$ .

1236

1237 **Figure S7. FTL1678 *trans*-complement and *C. jejuni* Pgp2 *trans*-complement restore *F.***  
1238 ***tularensis* phenotype.** Transmission electron micrograph images of: (A)  $\Delta FTL1678$  *trans*-  
1239 complemented with *FTL1678* [FTL1678 compl] or (B)  $\Delta FTL1678$  *trans*-complemented with *C.*  
1240 *jejuni* *pgp2* [Pgp2 compl]. Bacteria were grown in sMHB to OD<sub>600</sub> of 0.4. Scale bars represent  
1241 100 nm. (C) Outer membrane thickness and (D) cell width of FTL1678 compl and Pgp2 compl  
1242 were compared to WT LVS and  $\Delta FTL1678$ . \*\*\*\* indicates  $P < 0.0001$ .

1243

1244 **Figure S8. FTL1678 *trans*-complement and *C. jejuni* Pgp2 *trans*-complement exhibit**  
1245 **similar phenotypes to stressors as WT *F. tularensis*.** WT LVS [WT],  $\Delta FTL1678$ ,  $\Delta FTL1678$   
1246 *trans*-complemented with *FTL1678* [FTL1678 compl], or  $\Delta FTL1678$  *trans*-complemented with  
1247 *C. jejuni* *pgp2* [Pgp2 compl] were grown in either: (A) sMHB; (B) sMHB with 5 mM H<sub>2</sub>O<sub>2</sub>; (C)  
1248 sMHB with 5% NaCl; or (D) sMHB at pH 5.5. Cultures were incubated for 24 hours and OD<sub>600</sub>  
1249 measurements were recorded every 4 hours.

pid 1 80

*Ec* LdcA 100.0% -----MSLFHLIAPSGYCIKQHAALRC

*Pa* LdcA 23.0% -----MISRPPSSDQTWQPIDGRVALIAPASATAIDVLEAT

*Ng* LdcA 30.3% MTEPTSRRRFLKCTAAGAGLLQACGTSATSVPLPSSSHSVVKARIVPLQTPRRQSSDGNLLRVVASSGFAEDTNRVNTA

FTL1678 17.6% -----MLLKNNYLVSIIILVVLIMIVTKSFACAATDYNKVALINVS--TOYYPNDIKQA

FTT0101 17.6% -----MLLKNNYLVSIIILVVLIMIVTKSFACAATDYNKVALINVS--TOYYPNDIKQA

*Cj* Pgp2 6.3% -----MLKRLALLITLSSIMLHASDLVKIYLINQGLDAVGVATKELTQKD

pid 81 160

*Ec* LdcA 100.0% IQRLTDAGHQVNNVEVIARRCERFACTETERLEEDINSLAR--LITPTNTIVLAVRGGYG---ASRLIADIDWQALVARQOH

*Pa* LdcA 23.0% LRQLEVHGVVDYHLGRHVEARVRYLAGTVEQRLEDLHNAFD--MPDITAVWCRLRGGYG---CGQLLEGLDWGRILQAASPR

*Ng* LdcA 30.3% ITRLVNAGETVVTNQAGSRRFORFAGTDAQRADFQEVASCRVATPKVIMGLRGGYG---AARILPHIDFASLGARVRE

FTL1678 17.6% EKALKDGTGYNTT--YKYLDIYPSDFGYSNPDSIRAKILLDALLDKNIDIWFLKGGGG---AFNLLPYL--YDHINELKKA

FTT0101 17.6% EKALKDGTGYNTT--YKYLDIYPSDFGYSNPDSIRAKILLDALLDKNIDIWFLKGGGG---AFNLLPYL--YDHINELKKA

*Cj* Pgp2 6.3% FWLSEIGDKNISLGYDDNVAIVLTNKTDKILLRVVSYEDGKIRKDFEQQEITIGLMDGDKKIEGDLRTEVGFVDELGRKFNP

pid 161 240

*Ec* LdcA 100.0% DEPLLICGHSDFDTATOCGLLAHGNVITFSGPMIVANFGAEDLNAFTEHHEFWLALRNETFTTIEWQ-----GEGPTC

*Pa* LdcA 23.0% P--LIGFSDISVLLSAFHRHGLPAIHGPVATGLGLSPISAPREQQERIASLASVSRILAGIDHELP----VQHLGGHKQ

*Ng* LdcA 30.3% HGTLFFGFSDVCAVOLALAKGNMMSFAGPMAYSDFGKPAFGAFTMDAFIKGATQNRILTVDVVPY-----IQRADV

FTL1678 17.6% KPKILVGFSDVTAIHEFFVNNVLGWKSLHGVVAAYNKNAYSQKIEKIRINDLERIPNITEIINNGISYDKLMPMNMKMAYN

FTT0101 17.6% KPKILVGFSDVTAIHEFFVNNVLGWKSLHGVVAAYNKNAYSQKIEKIRINDLERIPNITEIINNGISYDKLMPMNMKMAYN

*Cj* Pgp2 6.3% GDPYYGPEFAFATTYPNLLDKVQCKTGGGIWIHGYPLDGSRLEDEFKTRGCIALFNNN-----LEKFAOV

pid 241 320

*Ec* LdcA 100.0% RAEGTLWGGNLA MLISLIGTP--WMPKTE NGILVLEDINEHFFRVERMLLQOLYHAGILPRKAIILGSFSGSTP--NDYDAG

*Pa* LdcA 23.0% RVEGALIGGNLTALACMAGTLGGLHAFAGSILVLEDVGEPEYRLERSLWOLLESIDARQLCAICLGSFTDCPR---KEVA

*Ng* LdcA 30.3% ETEGTLWGGNLSVLASLAGTP--YMPDIDGGILFLEDVGEQFYRIERMLNTLYLSGILGKORAIIVGDFRMEKIRDLYDSS

FTL1678 17.6% GTDGSIVGGNMTLIYSYFSTV--YQODISTKILFLEDTGISERQLDRSLHQLLYLPENKKPEAIIFGQFYPLDP--TDDQR

FTT0101 17.6% GTDGSIVGGNMTLIYSYFSTV--YQODISTKILFLEDTGISERQLDRSLHQLLYLPENKKPEAIIFGQFYPLDP--TDDQR

*Cj* Pgp2 6.3% VQDKKVEVMTEKPKIRAKKQIASLADLFTWKLAWNSDINTYLSFYDEQEFKRFDMKFEQEAISMKKKSI FRSKEDKK

pid 321 400

*Ec* LdcA 100.0% YNLESYAEFLRSRLSIPLITGLDFGHEQRTVTLPLGAHA--ILNNTREGTQLTISCHPVLKM-----

*Pa* LdcA 23.0% HSLEIRIFGEYAAAETEVP LYHHLPSGHGAONRAWFYGKTAVLEGNRLRW-----

*Ng* LdcA 30.3% YDFSVAKHISRTAKIPVLTGFPFGHIA DKITFELGAHTRIRMNGNCGYSVAFEGYPTLDASALTLDLTLPPDLPIFPE

FTL1678 17.6% LIYKTVIKKFAKTENRPVYVEPFIHGQYKNKPLLGVTSNIKCSKETIFCTLKOK-----

FTT0101 17.6% LIYKTVIKKFAKTENRPVYVEPFIHGQYKNKPLLGVTSNIKCSKETIFCTLKOK-----

*Cj* Pgp2 6.3% IKFSDINISPYENLENETMYRISFYEDVYTKNYCFRGDKILYVKIDSKGKMKLDAEQ-----

pid 401 408

*Ec* LdcA 100.0% -----

*Pa* LdcA 23.0% -----

*Ng* LdcA 30.3% SGVADISE

FTL1678 17.6% -----

FTT0101 17.6% -----

*Cj* Pgp2 6.3% -----



$\alpha$ FopA

WCL    OM    IM

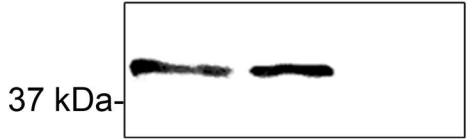

$\alpha$ SecY

WCL    OM    IM

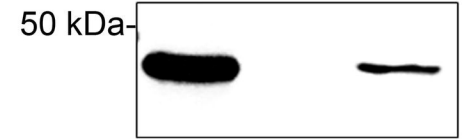

FTL1678

WCL    OM    IM

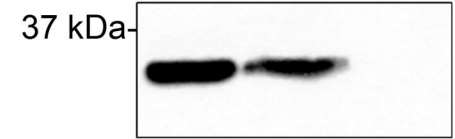

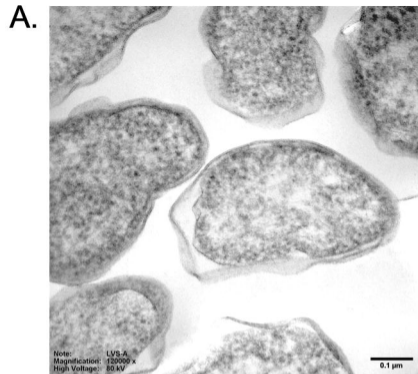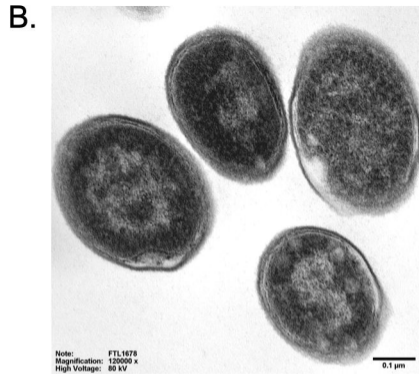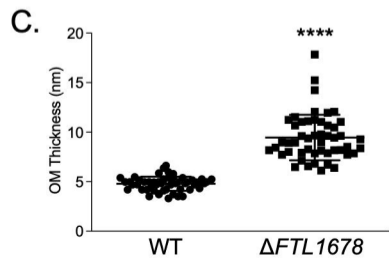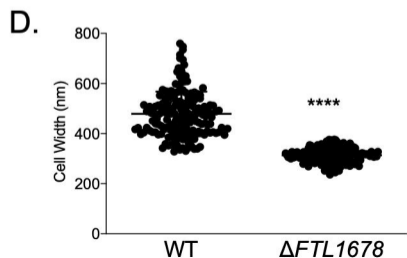

A.

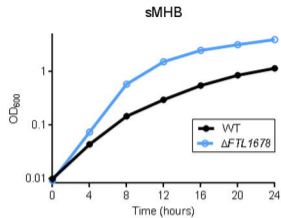

B.

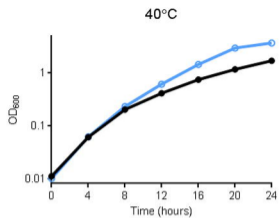

C.

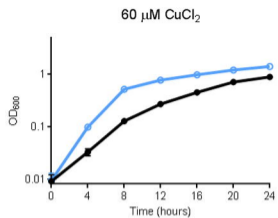

D.

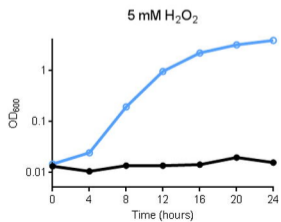

E.

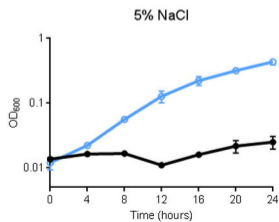

F.

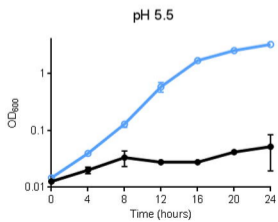

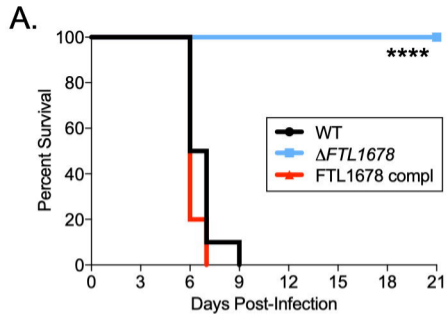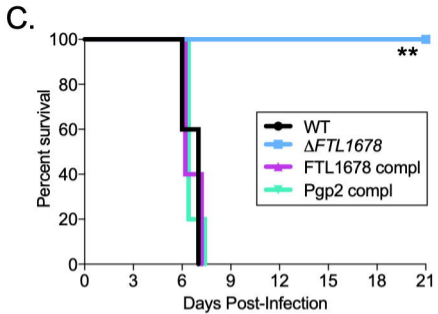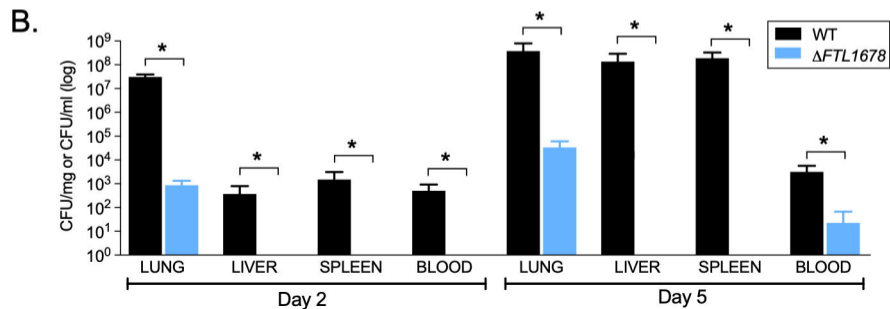

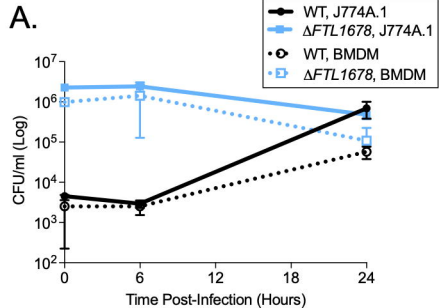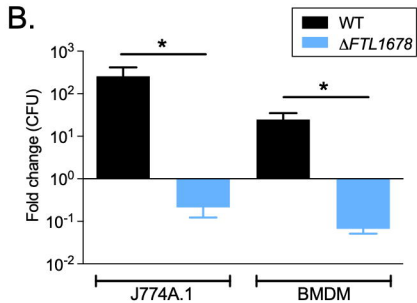

**A.**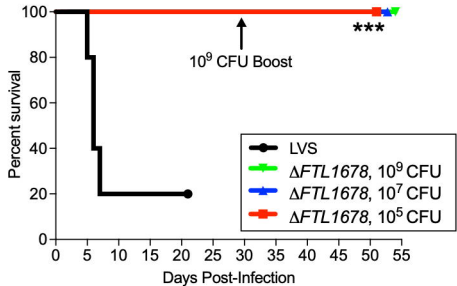**B.**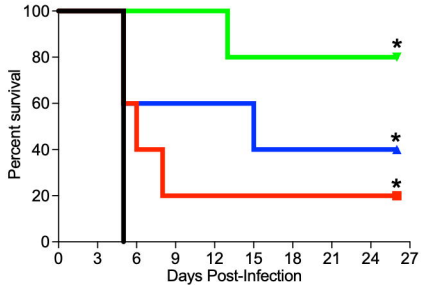

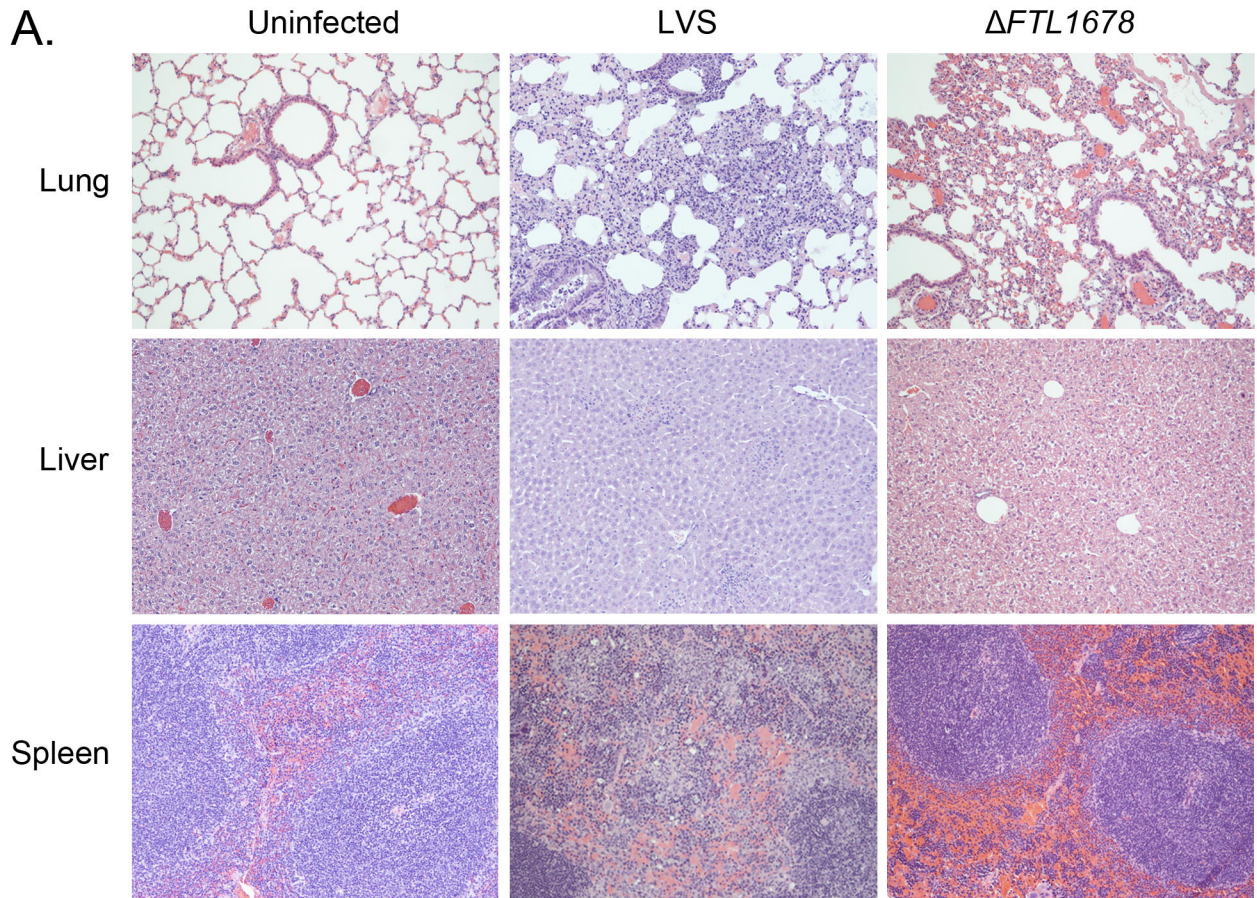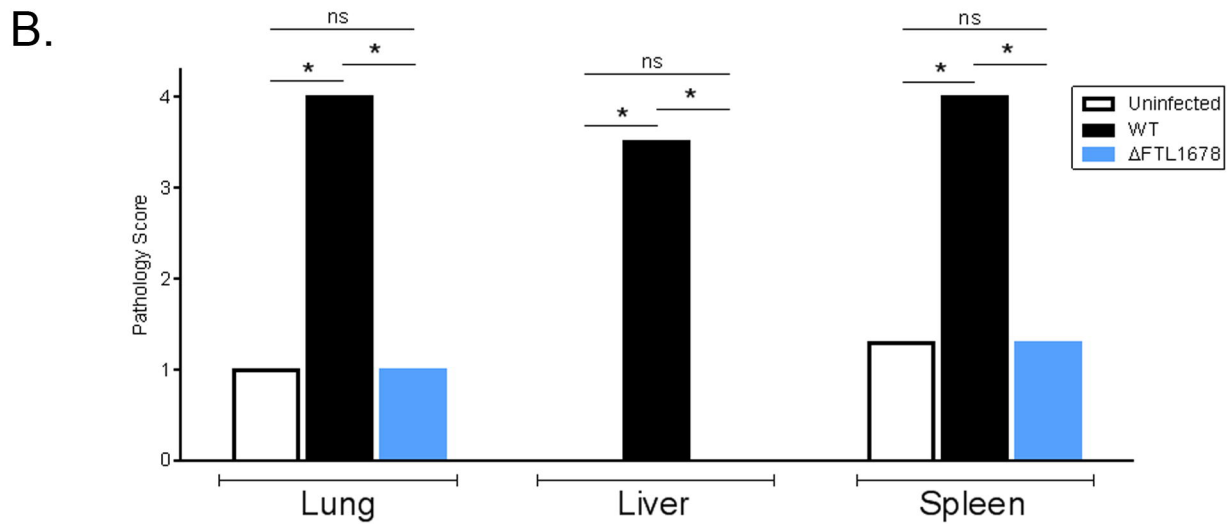

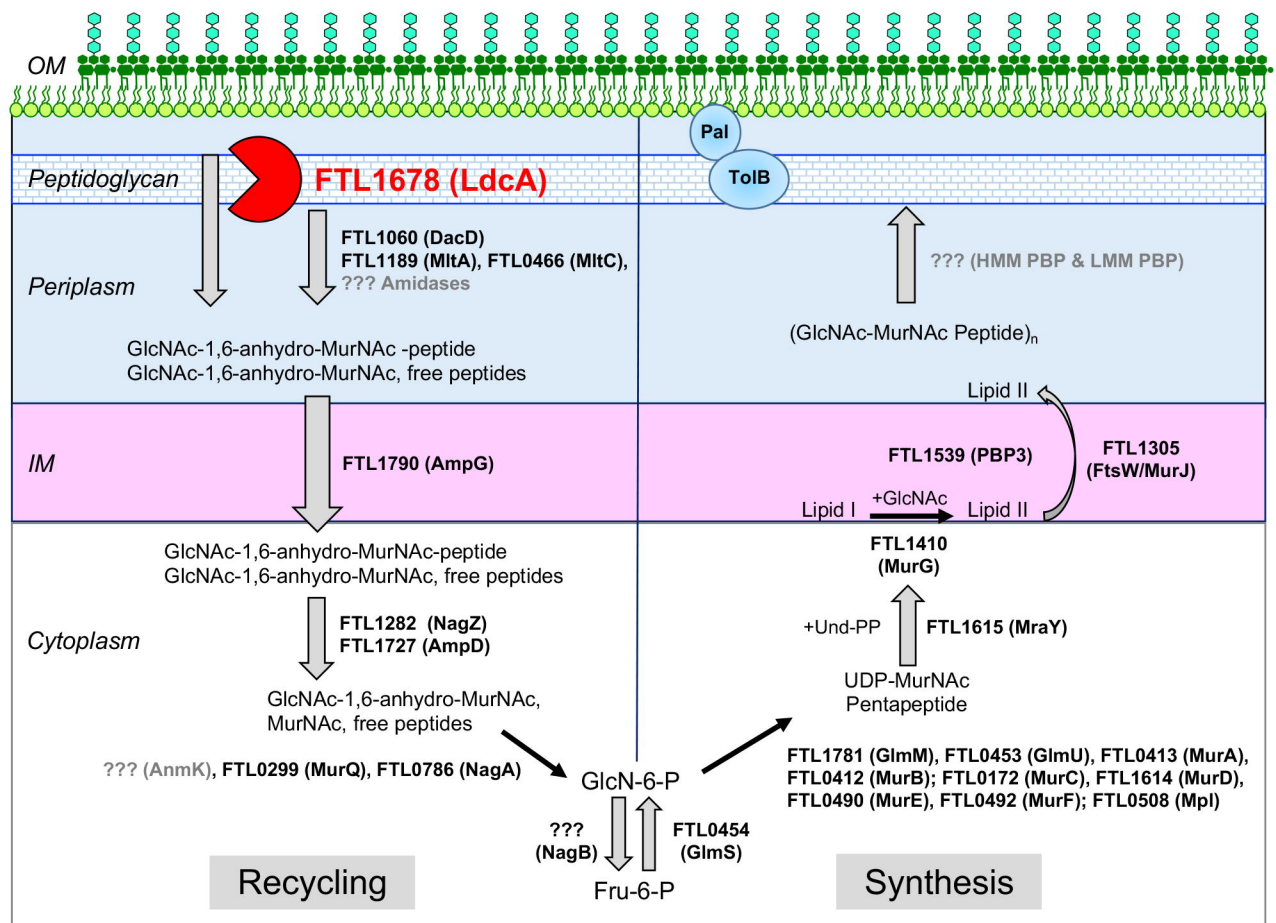

Source: https://www.biorxiv.org/content/10.1101/817593v2.full.pdf
