1 A *Francisella tularensis* L,D-carboxypeptidase plays important roles in cell morphology,  
2 envelope integrity, and virulence.

3

4

5 Briana Zellner<sup>1</sup>, Dominique Mengin-Lecreulx<sup>2</sup>, Brenden Tully<sup>1</sup>, William T. Gunning 3rd<sup>3</sup>,  
6 Robert Booth<sup>3</sup>, Jason F. Huntley<sup>1\*</sup>

7

8

9 <sup>1</sup>Department of Medical Microbiology and Immunology, University of Toledo, Toledo, OH,  
10 U.S.A.; <sup>2</sup> Université Paris-Saclay, CEA, CNRS, Institute for Integrative Biology of the Cell  
11 (I2BC), 91198, Gif-sur-Yvette, France; <sup>3</sup>Department of Pathology, University of Toledo,  
12 Toledo, OH, U.S.A.

13

14

15 Running Head: *F. tularensis* L,D-carboxypeptidase

16

17

18 To whom correspondence should be addressed: Jason F. Huntley, Department of Medical  
19 Microbiology and Immunology, University of Toledo College of Medicine and Life Sciences,  
20 3000 Arlington Ave., MS1021, HEB 200D, Toledo, OH, U.S.A., 43614. Tel.: 419-383-5456;  
21 Email: Jason.Huntley@UToledo.edu

22

23 **Summary**

24 *Francisella tularensis* is a Gram-negative, intracellular bacterium that causes the zoonotic  
25 disease tularemia. Intracellular pathogens, including *F. tularensis*, have evolved mechanisms to  
26 survive in the harsh environment of macrophages and neutrophils, where they are exposed to cell  
27 envelope-damaging molecules. The bacterial cell wall, primarily composed of peptidoglycan  
28 (PG), maintains cell morphology, structure, and membrane integrity. Intracellular Gram-  
29 negative bacteria protect themselves from macrophage and neutrophil killing by recycling and  
30 repairing damaged PG – a process that involves over 50 different PG synthesis and recycling  
31 enzymes. Here, we identified a PG recycling enzyme, L,D-carboxypeptidase A (LdcA), of *F.*  
32 *tularensis* that is responsible for converting PG tetrapeptide stems to tripeptide stems. Unlike *E.*  
33 *coli* LdcA and most other orthologs, *F. tularensis* LdcA does not localize to the cytoplasm and  
34 also exhibits L,D-endopeptidase activity, converting PG pentapeptide stems to tripeptide stems.  
35 Loss of *F. tularensis* LdcA led to altered cell morphology and membrane integrity, as well as  
36 attenuation in a mouse pulmonary infection model and in primary and immortalized  
37 macrophages. Finally, an *F. tularensis ldcA* mutant protected mice against virulent Type A *F.*  
38 *tularensis* SchuS4 pulmonary challenge.

39

40

41

42 **Keywords:** tularemia, peptidoglycan, L,D-carboxypeptidase, virulence, *Francisella*  
43 *tularensis*

44

45

46

## 47 **Introduction**

48         The Gram-negative bacterial cell wall plays an important role in maintaining cell shape,  
49 protecting against external insults, and preventing cell lysis amid fluctuations in internal turgor  
50 pressure (Dhar, 2018). The cell wall is composed of peptidoglycan (PG), a network of  
51 alternating *N*-acetylglucosamine (GlcNAc) and *N*-acetylmuramic acid (MurNAc) glycan chains  
52 that are crosslinked through peptide stems, and lies just outside of the cytoplasmic membrane of  
53 most bacteria (Johnson, 2013, Mengin-Lecreulx & Lemaitre, 2005). In *Escherichia coli*, PG has  
54 been shown to be covalently attached to the outer membrane (OM) by Braun's lipoprotein and  
55 noncovalently attached by Pal and other lipoproteins (Braun, 1969, Braun, 1975, Bouveret, 1999,  
56 Leduc, 1992). A loss of membrane integrity can occur if interactions between PG and attached  
57 lipoproteins are disturbed, thus maintenance of correct PG architecture is extremely important  
58 (Braun & Rehn, 1969, Braun & Hantke, 2019).

59         Synthesis of Gram-negative PG precursors, studied mainly in *E. coli*, occurs in the  
60 bacterial cytoplasm and requires a series of enzymes to build a pentapeptide PG monomer before  
61 transporting this molecule into the periplasm. Periplasmic PG cross-linking most often occurs  
62 between the fourth residue (D-Ala) of newly-formed pentapeptide stems to the third residue  
63 (*meso*-A<sub>2</sub>pm) of existing tripeptide stems (4-3 cross links), resulting in the release of the  
64 pentapeptide terminal D-Ala and forming tetrapeptide stems (Glauner, 1988, Pazos & Peters,  
65 2019). PG is not a static structure, rather, PG degradation/remodeling is necessary to incorporate  
66 new PG and expand the cell wall during bacterial growth and replication, to insert flagella or  
67 secretion systems, and to septate during bacterial division (Scheurwater, 2008). Up to 60% of  
68 PG is recycled per generation, helping to repair damaged PG and providing energy during

69 periods of stress or starvation (Dhar, 2018, Park, 2008, Holtje, 1998). Using *E. coli* as a model,  
70 more than 50 different PG synthesis and hydrolysis/recycling enzymes have been identified,  
71 most of which appear to be cytoplasmic. While deletion studies in *E. coli* have indicated that  
72 some PG synthesis enzymes are essential, few PG hydrolases have been found to be essential  
73 and, in fact, substantial redundancy in hydrolase activity appears to exist. Indeed, alterations in  
74 cell morphology, membrane integrity, and ability to replicate/divide sometimes are observed  
75 only after multiple PG metabolism genes have been deleted (Dhar, 2018, van Heijenoort, 2011,  
76 Vollmer & Bertsche, 2008). Given the increasing threat of antimicrobial-resistant organisms and  
77 link between PG homeostasis and bacterial virulence, more studies are needed to understand how  
78 a diverse range of Gram-negative bacteria synthesize and recycle PG (Juan, 2018). Finally, PG  
79 studies can reveal new strategies to treat bacterial infections, as an *Acinetobacter baumannii*  
80 penicillin-binding protein (PBP) mutant was reported to be more sensitive to complement-  
81 mediated killing than wild-type bacteria (Russo, 2009) and a *Helicobacter pylori* PG hydrolase  
82 (AmiA) mutant was unable to colonize mouse stomachs (Chaput, 2016).

83 PG recycling, mainly characterized in *E. coli*, begins with periplasmic lytic  
84 transglycosylase (LT) cleavage of the  $\beta$ -1,4-glycosidic linkage between MurNAc and GlcNAc,  
85 forming a GlcNAc-1,6-anhydro-MurNAc product, which creates sites for the insertion of PG  
86 precursors and recycling of the GlcNAc-1,6-anhydro-MurNAc peptide (Scheurwater, 2008).  
87 Low molecular mass penicillin-binding proteins (LMM PBPs) can function as endopeptidases,  
88 cleaving the cross-links between adjacent tetrapeptide stems, and/or as D,D-carboxypeptidases,  
89 removing the terminal D-Ala of pentapeptides, forming the tetrapeptide (Dhar, 2018). Inner  
90 membrane permeases, such as AmpG, then transfer GlcNAc-1,6-anhydro-MurNAc  
91 disaccharides, with or without attached peptides, to the cytoplasm where they can be

92 disassembled. Cytoplasmic NagZ and AmpD further degrade disaccharides by cleaving the bond  
93 between GlcNAc and 1,6-anhydro-MurNAc, and separating the peptide chain from 1,6-anhydro-  
94 MurNAc, respectively. Additional cytoplasmic hydrolases, such as L,D-carboxypeptidases  
95 (Ldc), act on free peptide chains to cleave the terminal D-Ala from tetrapeptides, resulting in  
96 tripeptides (Dhar, 2018). PG is unusual in that it is both highly dynamic (*e.g.*, allowing for  
97 bacterial division and molecular transport across the periplasm), yet tightly regulated to prevent  
98 membrane collapse and bacterial death. As such, PG recycling enzymes have been speculated to  
99 be important virulence determinants in Gram-negative bacteria (Juan, 2018). Indeed, *E. coli ldc*  
100 mutants lyse in stationary phase (Templin, 1999) and are more susceptible to  $\beta$ -lactam antibiotics  
101 (Ursinus, 1992), *Helicobacter* and *Campylobacter ldc* mutants have altered cell morphology and  
102 defects in motility and biofilm formation (Sycuro, 2013, Frirdich, 2012, Frirdich, 2014), and  
103 *Neisseria gonorrhoeae ldc* mutants are unable to stimulate NOD1-dependent responses in the  
104 host (Lenz, 2017). However, very little is known about the importance of PG recycling enzymes  
105 in the pathogenesis of intracellular pathogens such as *Francisella tularensis*.

106 *F. tularensis*, the causative agent of tularemia, is a Gram-negative, intracellular,  
107 coccobacillus that can infect and cause lethal disease in many species, including humans  
108 (Dennis, 2001, Keim, 2007). There are three subspecies of *F. tularensis*, subsp. *tularensis* (Type  
109 A), subsp. *holarctica* (Type B), and subsp. *mediasiatica*, although only subsp. *tularensis* and  
110 subsp. *holarctica* are virulent for humans (Kingry, 2014). *F. tularensis* poses a severe threat to  
111 public health and has been classified as an NIH Category A Priority Pathogen and a CDC Tier 1  
112 Select Agent due to its low infectious dose (<10 CFU), ease of aerosolization, and high  
113 morbidity and mortality rates (up to 60%) (Ellis, 2002, Sjostedt, 2007). Like other intracellular  
114 pathogens, *F. tularensis* has evolved different mechanisms to infect, survive, and replicate within

115 host cells, including macrophages and neutrophils (Ray, 2009). However, this lifestyle exposes  
116 the bacteria to reactive oxygen species (ROS), reactive nitrogen species (RNS), antimicrobial  
117 peptides, and other cell membrane- and cell wall-damaging molecules (Jones, 2012). Our group  
118 previously demonstrated that the *F. tularensis* disulfide bond formation protein A (DsbA)  
119 ortholog repairs damaged outer membrane proteins and known virulence factors. We  
120 additionally showed that *F. tularensis* DsbA, unlike periplasmic DsbA in *E. coli* and most other  
121 Gram-negative bacteria, is outer membrane-bound and is a multifunctional protein with both  
122 oxidoreductase and isomerase activities. Finally, using a molecular trapping approach, we  
123 identified over 50 *F. tularensis* DsbA substrates, many of which we speculate are involved in  
124 virulence (Ren, 2014).

125 Here, we determined the function of one of those *F. tularensis* DsbA substrates – a  
126 previously unstudied hypothetical protein containing a putative LdcA domain – and assessed its  
127 role in bacterial virulence. Deletion of *F. tularensis* *ldcA* resulted in bacteria with altered cell  
128 morphology, increased sensitivity to  $\beta$ -lactam antibiotics, yet increased resistance to several  
129 stressors (*e.g.*, H<sub>2</sub>O<sub>2</sub>, NaCl, low pH). Next, we demonstrated that *F. tularensis* LdcA exhibits  
130 L,D-carboxypeptidase and L,D-endopeptidase activities on pentapeptide and tetrapeptide  
131 residues of PG. Finally, we established that *F. tularensis* LdcA is required for virulence, as  
132 mutants were unable to replicate in macrophages or cause disease in mice.

133

## 134 **Results**

### 135 *FTLI678* contains a putative L,D-carboxypeptidase domain

136 Previous studies by our group and others have shown that *F. tularensis* DsbA mutants are  
137 attenuated in mice (Qin, 2009, Ren, 2014). However, additional work by our group,

138 demonstrating that DsbA possesses both oxidoreductase and isomerase activities to repair  
139 damaged envelope and cell membrane proteins, indicated that other envelope proteins likely are  
140 responsible for *F. tularensis* virulence (Ren, 2014). To identify new *F. tularensis* virulence  
141 factors, we used a molecular trapping approach and identified over 50 *F. tularensis* DsbA  
142 substrates (Ren, 2014). One of those DsbA substrates, FTL1678, is annotated in the *F. tularensis*  
143 genome as a conserved membrane hypothetical protein. Here, a conserved domain search  
144 revealed that a large portion of FTL1678 contains a putative Ldc domain, part of the  
145 peptidase\_S66 superfamily (Figure S1). Ldc proteins have been studied in a number of Gram-  
146 negative bacteria, including *E. coli* (Metz, 1986a, Templin, 1999, Metz, 1986b, Ursinus, 1992),  
147 *Pseudomonas aeruginosa* (Korza, 2005), *N. gonorrhoeae* (Lenz, 2017), and *Campylobacter*  
148 *jejuni* (Firdich, 2014). To further explore this conserved domain, amino acid sequences of  
149 FTL1678 (*F. tularensis* subsp. *holarctica* [Type B] LVS) and FTT0101 (homolog of FTL1678 in  
150 *F. tularensis* subsp. *tularensis* [Type A] SchuS4) were aligned with LdcA orthologs from *E. coli*,  
151 *P. aeruginosa*, *N. gonorrhoeae*, and *C. jejuni* (named Pgp2). Despite low percentages of amino  
152 acid identities among the LdcA orthologs (6.3% to 30.3%; Figure 1), there was a higher degree  
153 of amino acid similarity among LdcA orthologs (13.0% [*E. coli* and *C. jejuni*] to 44.7% [*E. coli*  
154 and *N. gonorrhoeae*]; Figure 1). Notably, the LdcA Ser-Glu-His catalytic triad, previously  
155 shown to be required for *P. aeruginosa* LdcA activity (Korza, 2005), was absent from *C. jejuni*  
156 Pgp2 but was present in all LdcA homologs, including FTL1678 and FTT0101 (Figure 1).

157

#### 158 *FTL1678 exhibits L,D-carboxypeptidase and L,D-endopeptidase activities*

159 To confirm the predicted Ldc activity of FTL1678 and FTT0101, recombinant FTL1678 and  
160 FTT0101 were expressed and affinity purified from *E. coli*. As a control, lysates from *E. coli*

161 containing the empty expression vector (pPROEX HTb) also were affinity-purified. PG  
162 precursors and PG intermediates were prepared as previously described (Herve, 2007, Blanot,  
163 1983, Pennartz, 2009, Leulier, 2003, Stenbak, 2004). HPLC retention times for all PG substrates  
164 and products are listed in Table S1. Recombinant FTL1678, lysate from the vector control, or  
165 buffer alone were incubated with various PG substrates (Table 1) to determine substrate  
166 specificity and specific activity. The vector control and buffer alone did not demonstrate activity  
167 against any of the PG substrates (Figure S2 and S3). When FTL1678 was incubated with various  
168 PG substrates, the highest specific activity was detected against the tetrapeptide substrates  
169 GlcNAc-anhydroMurNAc-L-Ala- $\gamma$ -D-Glu-*meso*-A<sub>2</sub>pm-D-Ala (tracheal cytotoxin; TCT; 21.5  
170 nmol/min/mg of protein; Table 1) and GlcNAc-MurNAc-L-Ala- $\gamma$ -D-Glu-*meso*-A<sub>2</sub>pm-D-Ala  
171 (reducing PG monomer; 15.6 nmol/min/mg of protein; Table 1), confirming that FTL1678  
172 exhibits L,D-carboxypeptidase activity. Interestingly, FTL1678 activity against free  
173 tetrapeptide, L-Ala- $\gamma$ -D-Glu-*meso*-A<sub>2</sub>pm-D-Ala, was approx. 6-fold lower (3.4 nmol/min/mg of  
174 protein; Table 1) than TCT and 5-fold lower than the reducing PG monomer (Table 1), indicating  
175 that GlcNAc and MurNAc may be important for tetrapeptide recognition or FTL1678 binding.  
176 Next, FTL1678 was found to exhibit negligible activity against L-lysine-containing substrates  
177 (0.7 to 1.3 nmol/min/mg of protein; Table 1), where L-lysine replaced *meso*-A<sub>2</sub>pm at the third  
178 amino acid position, indicating the importance of *meso*-A<sub>2</sub>pm. Importantly, FTL1678 exhibited  
179 specific activity against pentapeptide substrates MurNAc-L-Ala- $\gamma$ -D-Glu-*meso*-A<sub>2</sub>pm-D-Ala-D-  
180 Ala (9.8 nmol/min/mg of protein; Table 1) and UDP-MurNAc-L-Ala- $\gamma$ -D-Glu-*meso*-A<sub>2</sub>pm-D-  
181 Ala-D-Ala (5.9 nmol/min/mg of protein; Table 1), indicating that FTL1678 also functions as an  
182 L,D-endopeptidase (cleavage of the pentapeptide between *meso*-A<sub>2</sub>pm and D-Ala). D-Ala-D-  
183 Ala, but not D-Ala, was released in that case, confirming that FTL1678 did not display D,D-



184 carboxypeptidase activity. FTL1678 was not inhibited by 5 mM EDTA and did not require the  
185 presence of cations ( $Mg^{2+}$ ) for tetrapeptide cleavage (Figure S3).

186 To further investigate the endopeptidase activity of FTL1678, FTL1678 was incubated  
187 with various TCT monomer and dimer substrates, containing different peptide lengths and cross-  
188 link locations (Table S2). Although FTL1678 exhibited the highest specific activity against TCT  
189 monomers containing tetrapeptide stems with either an alanine or a glycine in the fourth position  
190 (20.1 nmol/min/mg and 18.0 nmol/min/mg of protein, respectively; Table S2), FTL1678 also  
191 was able to cleave all four variations of the TCT dimer (two cross-linked TCT monomers; Table  
192 S2). Together, these results demonstrated that FTL1678 exhibited both L,D-carboxypeptidase  
193 and L,D-endopeptidase activities. Of the four different TCT dimer analogs tested, FTL1678 was  
194 most active on TCT dimers connected by a 4-3 (D-D) D-Ala-*meso*-A<sub>2</sub>pm cross linkage (6.6  
195 nmol/min/mg of protein; Table S2), followed by an approx. 24-fold reduction in activity on 3-3  
196 (L-D) A<sub>2</sub>pm-A<sub>2</sub>pm cross links connecting two tripeptides (0.28 nmol/min/mg of protein; Table  
197 S2), a tripeptide and tetrapeptide with a glycine at the fourth position (0.21 nmol/min/mg of  
198 protein; Table S2), and a tripeptide and tetrapeptide with an alanine at the fourth position (0.16  
199 nmol/min/mg of protein; Table S2). These data suggest that, while FTL1678 exhibits  
200 endopeptidase activity on 4-3 and 3-3 cross-linked dimers, cleavage of 3-3 cross links is likely  
201 not its main physiological function.

202 Assays were repeated with recombinant FTT0101 (SchuS4 homolog) and, due to 99.4%  
203 amino acid identity with FTL1678, FTT0101 demonstrated similar tetrapeptide cleavage activity  
204 (*i.e.*, LdcA activity) as FTL1678 (Table 1). FTT0101 also was not active on a peptidoglycan  
205 polymer and had either no or negligible activity on PG monomers that were amidated at the  
206 *meso*-A<sub>2</sub>pm or D-Glu residues (Table 1).

207 As highlighted in Figure 1, a Ser-Glu-His catalytic triad was found in five of six Ldc  
208 orthologs examined here, including FTL1678 and FTT0101. However, *C. jejuni* Pgp2, which  
209 has been shown to exhibit LdcA activity (Frirdich, 2014), lacks the Ser-Glu-His catalytic triad,  
210 indicating that a Ser-Glu-His catalytic triad may not be required for LdcA function. As such, we  
211 speculated that single amino acid mutations of the putative Ser134-Glu239-His308 catalytic triad  
212 in FTL1678 may not be sufficient to abolish enzyme function. Recombinant FTL1678 mutant  
213 proteins were generated and purified, each containing either two amino acid mutations  
214 (S134A/E239A, S134A/H308A, and E239A/H308A) or three amino acid mutations  
215 (S134A/E239A/H308A). Similar to what is described above, enzymatic assays were performed,  
216 using the TCT monomer as a substrate. While no specific activity to TCT monomer was  
217 detected for the empty vector control or buffer alone (Figure S2), WT FTL1678 was active  
218 against the TCT monomer (21.5 nmol/min/mg; Table S3). By comparison, no activity was  
219 detected for any of the double or triple mutant proteins (Table S3), indicating that mutation of  
220 two or more amino acids of the putative Ser134-Glu239-His308 catalytic triad ablates FTL1678  
221 Ldc activity. Analysis of single amino acids of the putative Ser134-Glu239-His308 catalytic  
222 triad are described below.

223

#### 224 *FTL1678 is OM-associated*

225 *E. coli* and *P. aeruginosa* Ldcs have been localized to the bacterial cytoplasm (Templin,  
226 1999, Korza, 2005). However, *C. jejuni* Pgp2 is unusual in that it contains a signal peptide and  
227 has been speculated to be periplasmic (Frirdich, 2014). In addition, *N. gonorrhoeae* LdcA was  
228 found to be periplasmic and outer membrane-associated (Lenz, 2017). As noted above, we  
229 previously demonstrated that FTL1678 is a DsbA substrate (Ren, 2014), indicating that FTL1678

230 is located in the *F. tularensis* envelope (*i.e.*, in the inner membrane [IM], periplasm, or outer  
231 membrane [OM]). Bioinformatic analyses of FTL1678 indicated that it is a periplasmic protein  
232 due to the presence of a signal peptide but absence of OM or lipoprotein signatures (Table S4).  
233 To experimentally confirm FTL1678 localization, we generated an *F. tularensis* strain with 6×  
234 histidine-tagged FTL1678, then performed spheroplasting, osmotic lysis, and sucrose density  
235 gradient centrifugation to separate IM and OM fractions and probe for protein subcellular  
236 localization. Immunoblotting of whole-cell lysates (WCL), OM fractions, and IM fractions  
237 demonstrated that the OM control protein, FopA (Huntley, 2007), only was present in WCL and  
238 OM fractions (but not IM fractions; Figure 2) and the IM control protein, SecY (Huntley, 2007),  
239 only was present in WCL and IM fractions (but not OM fractions; Figure 2). By comparison,  
240 FTL1678 only was detected in WCL and OM fractions, demonstrating OM-association (Figure  
241 2). As noted above, because *N. gonorrhoeae* LdcA was found to fractionate to both the OM and  
242 soluble fractions (indicating periplasmic localization) (Lenz, 2017), we next examined the  
243 localization of *F. tularensis* periplasmic proteins in our fractions to better understand FTL1678  
244 localization. TolB is a well-known periplasmic protein in Gram-negative bacteria and binds to  
245 PG due to its interaction with the peptidoglycan associated lipoprotein, Pal (Clavel, 1998,  
246 Walburger, 2002). We previously demonstrated that the *F. tularensis* Pal homolog is OM-  
247 localized (Huntley, 2007), similar to its OM-localization in other Gram-negative bacteria. Here,  
248 the *F. tularensis* TolB homolog was detected in OM fractions, but not IM fractions (Figure S4),  
249 indicating that *F. tularensis* PG-associated proteins also fractionate with OMs. In summary, data  
250 that FTL1678 is a DsbA substrate (*i.e.*, FTL1678 is an envelope protein)(Ren, 2014), FTL1678  
251 contains a signal peptidase I cleavage site (Table S4), FTL1678 does not contain membrane  
252 protein signatures (Table S4), and FTL1678 is OM-associated (Figure 2), provides strong

253 evidence that FTL1678 is not a cytoplasmic protein, unlike *E. coli* LdcA. Instead, our data  
254 indicate that, similar to *N. gonorrhoeae* LdcA, FTL1678 may be a periplasmic protein.

255

### 256 *Deletion of FTL1678 alters bacterial morphology*

257 LdcA has been shown to be important for maintenance of bacterial morphology and  
258 structural integrity (Sycuro, 2013, Fridrich, 2014). In addition, mutations/deletions or  
259 combinations of mutations/deletions in PG-modifying proteins can result in abnormal bacterial  
260 morphology, emphasizing the importance of PG modification and recycling (Nelson, 2000,  
261 Guinane, 2006, Priyadarshini, 2007, Heidrich, 2001, Sycuro, 2010, Juan, 2018). To assess if  
262 FTL1678 plays a similar role in *F. tularensis*, we generated an isogenic deletion of *FTL1678*,  
263 referred to hereafter as  $\Delta FTL1678$ , in *F. tularensis* LVS. When examined by transmission  
264 electron microscopy (TEM), wild-type (WT) bacterial width ranged from 350 to 800 nm (Figures  
265 3A and 3D), whereas  $\Delta FTL1678$  bacteria were more uniform in cell width, averaging approx.  
266 350 nm (Figures 3B and 3D). While WT bacteria generally were observed to be coccobacilli  
267 (Figure 3A),  $\Delta FTL1678$  bacteria were found to be more coccoid in appearance, the  $\Delta FTL1678$   
268 OM was more tightly-associated than WT OMs, and three electron dense structures, likely the  
269 OM, PG, and IM, were present around the periphery of the majority of  $\Delta FTL1678$  bacterium  
270 (Figure 3B), compared to less prominent outer structures surrounding WT bacteria (Figure 3A).  
271 Additionally,  $\Delta FTL1678$  bacteria appeared more electron dense and had significantly-thicker  
272 OMs than WT bacteria (Figures 3A, 3B, and 3C).

273 Previous studies have shown that deletion of genes for PG-modifying proteins (*e.g.*,  
274 murein hydrolases) can result in abnormal growth characteristics, including lysis during  
275 stationary phase (Templin, 1999) and an inability to separate daughter cells at the septa during

276 cell division, resulting in abnormal bacterial chains (Heidrich, 2002, Denome, 1999,  
277 Priyadarshini, 2006, Priyadarshini, 2007, Heidrich, 2001, Chaput, 2016, Juan, 2018, Weaver *et*  
278 *al.*, 2019). Although *N*-acetylmuramyl-L-alanine amidases have been shown to be  
279 predominantly involved in the cleavage of bacterial septa, deletion of lytic transglycosylases and  
280 some endopeptidases, in combination with amidase deletions, also have resulted in abnormal  
281 bacterial chains (Heidrich, 2001, Heidrich, 2002). To examine any potential replication defects  
282 of  $\Delta FTL1678$ , we compared both OD<sub>600</sub> values (Figure S5A) and CFUs over time (Figure S5B)  
283 of WT and  $\Delta FTL1678$  in supplemented Mueller-Hinton Broth (sMHB; standard growth medium  
284 for *F. tularensis*; (Huntley, 2007)), finding that  $\Delta FTL1678$  did not have any inherent growth  
285 defects. When examining both WT and  $\Delta FTL1678$  by TEM for any septation defects or  
286 abnormal bacterial chains, approximately 10% of  $\Delta FTL1678$  bacteria grew in chains of three to  
287 four bacteria (Figure S6A and S6B), whereas no WT bacteria exhibited this septation defect  
288 (data not shown). Taken together, our findings that  $\Delta FTL1678$  is 1.5- to 2-times smaller than  
289 WT (Figure 3D),  $\Delta FTL1678$  is more coccoid in shape (Figure 3B),  $\Delta FTL1678$  has a thicker OM  
290 (Figure 3B and 3C), and  $\Delta FTL1678$  has a partial septum defect (Figure S6), further support the  
291 role of FTL1678 as a PG-modifying enzyme that is important for bacterial elongation and  
292 division.

293 To provide additional evidence that alterations in  $\Delta FTL1678$  morphology were solely due  
294 to loss of FTL1678 Ldc activity, we sought to complement  $\Delta FTL1678$  with either *FTL1678* or a  
295 known LdcA and assess restoration of WT bacterial morphology. Although *E. coli* and *P.*  
296 *aeruginosa* LdcA orthologs contain the Ser-Glu-His catalytic triad (Figure 1), those LdcA  
297 orthologs are cytoplasmic and, given our data that FTL1678 is OM-localized and PG-associated  
298 (*i.e.*, may be periplasmic; Figure 2), we speculated that cytoplasmic LdcA orthologs may not

299 function in the *F. tularensis* periplasm. In contrast, *C. jejuni* Pgp2 has been shown to exhibit  
300 LdcA activity, has been speculated to be periplasmic (Firdich, 2014), but lacks the Ser-Glu-His  
301 catalytic triad (Figure 1). To examine if *FTL1678* or *pgp2* could complement  $\Delta$ *FTL1678*, we  
302 independently generated an *FTL1678 in trans*-complement and a *pgp2 in trans*-complement,  
303 examined bacterial morphologies of both complemented strains by TEM, and found that both  
304 complemented strains had similar morphologies as WT LVS (Figure S7A-B and Figure 3A).  
305 Additionally, OM thickness and cell width were measured for WT,  $\Delta$ *FTL1678*, and both  
306 complemented strains, demonstrating that both complemented strains had OM thicknesses and  
307 cell widths similar to WT, and both complemented strains were significantly different from  
308  $\Delta$ *FTL1678* (Figure S7C-D). Taken together, these complementation studies provide further  
309 evidence that *FTL1678* is an LdcA and that  $\Delta$ *FTL1678* morphological changes are due to loss of  
310 LdcA activity. These studies also indicate that the *C. jejuni* LdcA ortholog, Pgp2, which is a  
311 putative periplasmic protein and lacks the Ser-Glu-His catalytic triad, exhibits LdcA activity in  
312 *F. tularensis*.

313

#### 314 *Deletion of FTL1678 affects sensitivity to antibiotics, detergents, and stressors*

315 Given the above noted morphological differences in the  $\Delta$ *FTL1678* envelope (*e.g.*,  
316 thicker OM; tightly-associated OM; more electron dense envelope structures) using TEM, we  
317 assessed envelope (*i.e.*, IM, PG, and OM) integrity by growing both WT and  $\Delta$ *FTL1678* bacteria  
318 in the presence of various antibiotics, detergents, and dyes, and measuring zones of inhibition  
319 after 48 h of growth (Table 2).  $\Delta$ *FTL1678* was found to be more susceptible than WT to  
320 ampicillin, vancomycin, lysozyme, and SDS (Table 2), indicating potential changes to PG  
321 (ampicillin sensitivity), OM integrity (vancomycin and lysozyme sensitivity), or efflux pumps

322 (SDS sensitivity). Conversely,  $\Delta FTL1678$  was found to be more resistant than WT to  
323 gentamicin, tetracycline, chloramphenicol, ciprofloxacin, and ethidium bromide (Table 2).  
324 Given that the majority of these latter reagents must enter the cytoplasm to exert their inhibitory  
325 effects (*i.e.*, gentamicin, tetracycline, and chloramphenicol inhibit protein synthesis;  
326 ciprofloxacin and ethidium bromide interfere with DNA replication), these results suggest that  
327  $\Delta FTL1678$  bacteria exclude these inhibitory molecules from entering the cytoplasm.

328 To better understand potential differences in the  $\Delta FTL1678$  envelope, WT and  
329  $\Delta FTL1678$  were grown in either sMHB at 37°C or in sMHB with various stress conditions. In  
330 sMHB at 37°C,  $\Delta FTL1678$  did not exhibit a growth defect but, instead, appeared to grow to a  
331 higher optical density (OD<sub>600</sub>) than WT (Figure 4A). However, as noted above, despite higher  
332 OD<sub>600</sub> measurements for  $\Delta FTL1678$  at several time points, bacterial numbers were not  
333 significantly different between WT and  $\Delta FTL1678$  (Figure S5). Although speculative, the  
334 disassociation between  $\Delta FTL1678$  optical densities and bacterial numbers may be due to the  
335 observed TEM morphological differences of  $\Delta FTL1678$  (Figure 3 and Figure S6). Compared  
336 with growth in sMHB at 37°C, no substantial differences in the growth rates of WT and  
337  $\Delta FTL1678$  were observed at either 40°C (Figure 4B) or in the presence of 60  $\mu$ M CuCl<sub>2</sub>, an  
338 oxidizing agent (Ren, 2014); Figure 4C). However,  $\Delta FTL1678$  grew considerably better than  
339 WT in the presence of 5 mM H<sub>2</sub>O<sub>2</sub>, 5% NaCl, and pH 5.5 (Figures 4D, 4E, and 4F, respectively),  
340 providing further evidence of modifications to the  $\Delta FTL1678$  envelope. To confirm that  
341  $\Delta FTL1678$  envelope integrity differences were not due to polar effects, both the  $FTL1678$  *trans*-  
342 complement and a *pgp2* *trans*-complement were grown in the presence of the same stressors and  
343 both complemented strains were found to exhibit similar phenotypes as WT LVS (Figure S8A-D  
344 and Table S5). Taken together, these results indicated that loss of  $FTL1678$ , and its associated

345 LdcA activity, resulted in unidentified, and likely complex, perturbations in bacterial envelope  
346 components, including the OM, PG, and/or IM.

347         The Type A *F. tularensis* strain SchuS4 originally was isolated from a human tularemia  
348 patient and requires BSL3 containment. Given its relevance to human disease, we next  
349 generated an isogenic deletion mutant of the *FTL1678* homolog, *FTT0101*, in SchuS4. The  
350 susceptibilities of  $\Delta$ *FTT0101* and WT SchuS4 to various antibiotics, detergents, and dyes were  
351 compared, with no significant differences observed (Table S6). At this time, we cannot fully  
352 explain why the  $\Delta$ *FTL1678* mutant (*F. tularensis* Type B) displays altered sensitivity/resistance  
353 to antibiotics, detergents, and dyes (Table 2), while the  $\Delta$ *FTT0101* mutant (*F. tularensis* Type A)  
354 did not demonstrate altered sensitivity/resistance toward these same compounds (compared to  
355 WT SchuS4; Table S6). However, this finding is not unexpected given genomic studies  
356 indicating that, despite >97% nucleotide identity between Type A and Type B *F. tularensis*,  
357 there are over 100 genomic rearrangements between Type A and Type B and each subspecies  
358 encodes over 100 unique genes that likely influence known differences in Type A and Type B  
359 virulence (Petrosino *et al.*, 2006).

360

361 *FTL1678 and LdcA activity are required for F. tularensis virulence in vivo*

362         To examine if *FTL1678* plays a role in *F. tularensis* virulence, groups of C3H/HeN mice  
363 were intranasally infected with  $10^4$  CFU of either WT or  $\Delta$ *FTL1678* and monitored daily for  
364 signs of disease. Whereas all WT-infected mice died by day 9 post-infection (median time-to-  
365 death day 6),  $\Delta$ *FTL1678* was completely attenuated (100% survival through day 21 post-  
366 infection), demonstrating that *FTL1678* is required for *F. tularensis* virulence (Figure 5A). To  
367 confirm that the observed attenuation was solely due to the deletion of *FTL1678*, and not to polar



368 effects, we tested the virulence of the  $\Delta FTL1678$  *in trans*-complement in mice, which fully-  
369 restored virulence to WT levels (all mice died by day 7; median time-to-death day 6; Figure 5A).

370 To more carefully assess  $\Delta FTL1678$  attenuation *in vivo*, we intranasally-infected mice  
371 with  $10^4$  CFU of either WT LVS or  $\Delta FTL1678$ , and enumerated bacterial CFUs from lungs,  
372 livers, spleens, and blood on days 2 and 5 post-infection to examine bacterial replication and  
373 dissemination to these organs/tissues over time. On day 2 post-infection, WT LVS replicated to  
374  $>10^7$  CFU/mg lung and had disseminated to livers, spleens (approx.  $10^3$  CFU/mg), and blood  
375 ( $10^3$  CFU/ml; Figure 5B). In contrast,  $\Delta FTL1678$  had an initial (day 2) colonization defect in the  
376 lungs ( $>35,000$ -fold lower than WT) and was unable to disseminate to livers, spleens, or blood  
377 (Figure 5B). By day 5 post-infection, the attenuation of  $\Delta FTL1678$  was even more apparent,  
378 with WT LVS replicating to extremely high numbers (approx.  $10^8$  CFU/mg) in lungs, livers, and  
379 spleens, compared with  $\Delta FTL1678$ , which replicated in lungs between day 2 and 5, but was  
380  $>11,000$ -fold attenuated in lungs and was not detectable in livers or spleens (Figure 5B).  
381 Although  $\Delta FTL1678$  was detected in the blood on day 5, it was 142-fold less than WT LVS  
382 (Figure 5B).

383 As noted above, of the six Ldc orthologs examined here, only *C. jejuni* Pgp2 lacks the  
384 Ser-Glu-His catalytic triad (Figure 1). However, *C. jejuni* Pgp2 has been shown to exhibit LdcA  
385 activity (Frirdich, 2014), indicating that a Ser-Glu-His catalytic triad is not required for LdcA  
386 function. To test if an LdcA ortholog, without the Ser-Glu-His catalytic triad, could restore  
387 virulence in the  $\Delta FTL1678$  mutant, we complemented  $\Delta FTL1678$  with *C. jejuni* Pgp2 *in trans*  
388 and infected groups of mice with either WT LVS,  $\Delta FTL1678$ ,  $\Delta FTL1678$  *trans*-complemented  
389 with FTL1678, or  $\Delta FTL1678$  *trans*-complemented with *C. jejuni* Pgp2. While  $\Delta FTL1678$  was  
390 fully attenuated (100% survival through day 21), the Pgp2 *trans*-complement was fully-virulent

391 (median time-to-death 6 days; all mice dead by day 7), nearly identical to WT LVS (median  
392 time-to-death 7 days; all mice dead by day 7) and the *FTL1678 trans*-complement (median time-  
393 to-death 6 days; all mice dead by day7; Figure 5C). These *in vivo* data provide further evidence  
394 that *FTL1678* is an Ldc and that Ldc activity, with or without the Ser-Glu-His catalytic triad, is  
395 required for *F. tularensis* virulence.

396 Finally, given the relevance of SchuS4 to human disease, we next examined the virulence  
397 of  $\Delta FTT0101$ , the *FTL1678* homolog, in our mouse infection model. When groups of C3H/HeN  
398 mice were intranasally-infected with either WT SchuS4 or  $\Delta FTT0101$ , all mice died by day 7  
399 post-infection, indicating that *FTT0101* is not required for SchuS4 virulence (Figure S9).  
400 Whereas  $\Delta FTT0101$ -infected mice exhibited a slightly delayed time-to-death (median time-to-  
401 death day 6; Figure S9), compared with WT SchuS4-infected mice (median time-to-death day 5;  
402 Figure S9), this may be due to differences in the infectious dose administered to mice in this  
403 experiment (80 CFU SchuS4; 12 CFU  $\Delta FTT0101$ ). However, it also remains possible that the  
404 extreme virulence of SchuS4 (intranasal LD<sub>50</sub> <10 CFU in our hands) and over 100 genomic  
405 rearrangements between Type A and Type B *F. tularensis* (noted above) complicates  
406 assessments of mutant attenuation *in vivo*.

407  
408 *Individual residues of the FTL1678 catalytic triad are not required for F. tularensis virulence in*  
409 *vivo*

410 As noted above and highlighted in Figure 1, *P. aeruginosa* LdcA contains a Ser-Glu-His  
411 catalytic triad which is essential for function and is characteristic of Ldc in the Peptidase\_S66  
412 family (Korza, 2005). The same catalytic triad also has been confirmed in Ldc from *E. coli*  
413 (Meyer, 2018), *Novosphingobium aromaticivorans* (Das, 2013), and *N. gonorrhoeae* (Lenz,

414 2017). Given the relatively conserved spacing of Ser134-Glu239-His308 residues in FTL1678  
415 (Figure 1) and our findings that both double (S134A/E239A, S134A/H308A, E239A/H308A)  
416 and triple (S134A/E239A/H308A) mutants did not exhibit LdcA activity (Table S3), we tested if  
417 individual amino acid residues of the catalytic triad were required for *F. tularensis* virulence  
418 (similar to Figure 5A virulence assessments for  $\Delta FTL1678$  and the FTL1678 complemented  
419 strain). Site-directed mutagenesis was performed to independently generate FTL1678  
420 complementation constructs containing either S134A, E239A, or H308A mutations. Next,  
421  $\Delta FTL1678$  was complemented *in-trans* with each of these FTL1678 catalytic triad point mutants,  
422 and groups of C3H/HeN mice were intranasally infected with either WT,  $\Delta FTL1678$ ,  $\Delta FTL1678$   
423 *trans*-complemented with FTL1678, or  $\Delta FTL1678$  *trans*-complemented with one of the  
424 FTL1678 catalytic triad point mutants (referred to hereafter as S134A, E239A, and H308A).  
425 Confirming our previous findings,  $\Delta FTL1678$  was completely attenuated (100% survival through  
426 day 21), while complementation of  $\Delta FTL1678$  with either FTL1678 (all mice dead by day 8),  
427 S134A (all mice dead by day 7), E239A (all mice dead by day 8), or H308A (all mice dead by  
428 day 8), fully-restored virulence to WT LVS levels (all mice dead by day 10; Figure S10). These  
429 results should not be overinterpreted, as it is difficult to directly compare or fully explain why  
430 mutations of single amino acids in the FTL1678 putative catalytic triad had no effect on *in vivo*  
431 virulence (Figure S10), while mutations of any two amino acids in the catalytic triad ablated  
432 FTL1678 LdcA enzyme activity *in vitro* (Table S3). It remains possible that single or multiple  
433 residues of the FTL1678 catalytic triad are required for full LdcA activity *in vitro* or that, in the  
434 context of the whole bacterium (*i.e.*, *in vivo*), other *F. tularensis* proteins may have compensated  
435 for partially-functional FTL1678, due to S134A, E239A, and H308A single amino acid  
436 mutations. Regardless, these studies indicate that, while single amino acid mutations of the

437 FTL1678 Ser-Glu-His catalytic triad do not impact *F. tularensis* virulence *in vivo*, two or more  
438 residues of the Ser-Glu-His catalytic triad are required for FTL1678 LdcA activity.

439

440 *FTL1678 is required for F. tularensis replication in macrophages*

441 *F. tularensis* is an intracellular pathogen and macrophages appear to be one of the major  
442 targets for *F. tularensis* infection and replication (De Pascalis, 2018, Steiner, 2017, Hall, 2008).  
443 To investigate potential replication defects of  $\Delta$ FTL1678 in macrophages, J774A.1 macrophages  
444 or murine bone marrow-derived macrophages (mBMDM) were infected with either WT LVS or  
445  $\Delta$ FTL1678 (MOI 100:1) and bacterial numbers were enumerated at 0 h (entry), 6 h, and 24 h  
446 post-infection. At entry (0 h), > 300-fold more  $\Delta$ FTL1678 were present in both macrophage  
447 lines, compared with WT LVS (Figure 6A). This likely was due to the above noted gentamicin  
448 resistance of  $\Delta$ FTL1678 (Table 2). Attempts to normalize entry numbers for both WT LVS and  
449  $\Delta$ FTL1678, using different antibiotics or combinations of antibiotics, were not successful.  
450 Despite higher numbers of  $\Delta$ FTL1678 in both macrophages at entry (0 h) and 6 h,  $\Delta$ FTL1678  
451 was unable to replicate in either macrophage, decreasing 13-fold in BMDM and 5-fold in  
452 J774A.1 macrophages from 6 h to 24 h (CFU data in Figure 6A; fold change data in Figure 6B).  
453 By comparison, WT LVS numbers increased 236-fold in BMDM and 22-fold in J774A.1  
454 macrophages from 6 h to 24 h (Figure 6A-B). Taken together, these *in vitro* results (Figure 6A-  
455 B) confirm the observed *in vivo* attenuation of  $\Delta$ FTL1678 (Figure 5A-C).

456

457  *$\Delta$ FTL1678 protects mice against Type A F. tularensis infection*

458 No FDA-approved vaccine currently is available to prevent tularemia. In addition, *F.*  
459 *tularensis* is designated as an NIH Category A priority pathogen and CDC Tier 1 Select Agent,

460 highlighting the extreme virulence of this bacterium and the need for a safe and effective vaccine  
461 to prevent tularemia. Given our above findings that  $10^5$  CFU of  $\Delta FTL1678$  did not cause disease  
462 or death in mice (Figure 5A-C), we next examined whether high doses ( $10^7$  or  $10^9$  CFU) of  
463  $\Delta FTL1678$  were attenuated or if  $\Delta FTL1678$  immunization could protect mice from fully-virulent  
464 Type A *F. tularensis* SchuS4 challenge. First, all mice intranasally immunized with either  $10^5$ ,  
465  $10^7$ , or  $10^9$  CFU of  $\Delta FTL1678$  survived through day 28 post-infection, with no signs of clinical  
466 disease (Figure 7A). Next, on day 29, all mice were boosted with  $10^9$  CFU of  $\Delta FTL1678$  and no  
467 mice demonstrated any signs of disease through day 50 (Figure 7A). Finally, on day 51, mice  
468 were intranasally-challenged with 120 CFU ( $6\times$  the  $LD_{50}$ ) of SchuS4 and the health status of  
469 each immunization group was monitored for 26 days post-challenge. In a dose-dependent  
470 manner, the  $10^9$  prime- $10^9$  boost regimen conferred 80% protection, the  $10^7$  prime- $10^9$  boost  
471 regimen conferred 40% protection, and the  $10^5$  prime- $10^9$  boost regimen conferred 20%  
472 protection (Figure 7B). These data demonstrate that  $\Delta FTL1678$  is highly attenuated (up to  $10^9$   
473 CFU) and that  $\Delta FTL1678$  may be able to be used as a live, attenuated vaccine.

474

#### 475 *$\Delta FTL1678$ does not cause tissue damage*

476 The *in vitro* (Figure 6) and *in vivo* (Figure 5A-C and Figure 7A) attenuation of  
477  $\Delta FTL1678$ , as well as protection against SchuS4 pulmonary challenge (Figure 7B), indicated that  
478  $\Delta FTL1678$  could be used as a live, attenuated vaccine. While live, attenuated vaccines have  
479 been extremely effective at preventing a number of diseases, they can pose safety challenges  
480 (Minor, 2015, Roberts, 2018). To assess whether  $\Delta FTL1678$  immunization induced any  
481 pathology in immunized mice, lungs, livers, and spleens from uninfected, WT LVS-, or  
482  $\Delta FTL1678$ -infected mice were assessed for pathologic changes on day 5 post-

483 infection/immunization. Day 5 is when mice exhibit severe signs of disease and is one day  
484 before the majority of WT-infected mice begin succumbing to disease (Figures 5 and 7). WT  
485 LVS-infected lungs demonstrated alveolar wall thickening, large areas of inflammation, and  
486 severe neutrophil infiltration (Figure 8A). By comparison, little inflammation was observed in  
487  $\Delta FTL1678$ -infected lungs, although some red blood cell congestion was present, indicating a  
488 limited, acute immune response that was quickly resolved (Figure 8A). Whereas WT LVS-  
489 infected livers were characterized by diffuse inflammation with focal areas of necrosis,  
490  $\Delta FTL1678$ -infected livers were virtually indistinguishable from uninfected livers, with no  
491 observable pathology (Figure 8A). Finally, although the architecture of WT LVS-infected  
492 spleens lacked distinct areas of white pulp or red pulp, indicative of a severe infection,  
493  $\Delta FTL1678$ -infected spleens were observed to contain distinct areas of red pulp and white pulp,  
494 with some red blood cell congestion – indicating a limited, acute immune response that was  
495 quickly resolved (Figure 8A). All tissues were blindly scored using a pathology severity index  
496 (scale from 0 to 4, with 4 indicating severe pathology), confirming that  $\Delta FTL1678$ -infected  
497 tissues were virtually indistinguishable from uninfected tissues (pathology scores of 1 for lungs,  
498 0 for liver, and 1.5 for spleens) and WT LVS-infected tissues had significantly higher pathology  
499 scores (pathology scores  $>3.5$  for all tissues; Figure 8B).

500

## 501 **Discussion**

502 Bacterial PG is a complex, mesh-like structure, composed of a glycan backbone,  
503 crosslinked to varying degrees, by peptide chains (de Pedro, 2015). It is well known that this  
504 structure plays an important role in maintaining Gram-negative bacterial cell morphology,  
505 membrane integrity, regulating changes in osmotic pressure, and providing a platform for

506 attachment of the OM (den Blaauwen, 2008, Silhavy *et al.*, 2010). Although a majority of PG  
507 studies have focused on how the thick layer of PG in Gram-positive bacteria contributes to  
508 virulence and antibiotic resistance, more recent studies have highlighted that Gram-negative PG  
509 also is intimately linked with pathogenicity (Juan, 2018).

510 PG recycling is an essential function of Gram-negative bacteria during cell growth and  
511 division to produce new cell wall components. In fact, Gram-negative bacteria recycle up to  
512 60% of their PG with every generation, suggesting that both PG synthesis and PG recycling are  
513 dynamic (Dhar, 2018, Typas, 2011, Park, 2008). A number of proteins are involved in these  
514 processes and, while they are well-characterized in *E. coli*, very little is known about these  
515 pathways in intracellular pathogens such as *Burkholderia pseudomallei*, *Legionella*  
516 *pneumophila*, or *F. tularensis* (van Heijenoort, 2011, Jenkins, 2019, Spidlova, 2018, Kijek,  
517 2019).

518 *E. coli* LdcA, a cytoplasmic protein, was the first L,D-carboxypeptidase to be identified  
519 and was shown to be important for PG recycling and survival during stationary phase (Ursinus,  
520 1992, Templin, 1999). More recently, Ldc orthologs have been identified in *P. aeruginosa*  
521 (Korza, 2005), *C. jejuni* (Friedrich, 2014), *N. gonorrhoeae* (Lenz *et al.*, 2017), and *N.*  
522 *aromaticivorans* (Das, 2013). In this study, we identified an *F. tularensis* Ldc ortholog,  
523 FTL1678, which we propose naming LdcA based on its confirmed L,D, carboxypeptidase  
524 activity (Table 1) and role in maintaining bacterial morphology. Unlike well-characterized  
525 cytoplasmic LdcA orthologs from *E. coli* and *P. aeruginosa*, we demonstrated that *F. tularensis*  
526 LdcA was localized to OM fractions and, given co-localization with PG-associated proteins Pal  
527 and TolB, is most likely located on the inner leaflet of the OM or in the periplasm (associated  
528 with PG). At this time, we can only speculate on the OM-association or periplasmic localization

529 of *F. tularensis* LdcA, but in the context of PG repair and recycling, periplasmic LdcA certainly  
530 offers a fitness advantage. In addition, this is not the first report of a periplasmic LdcA, as *C.*  
531 *jejuni* Pgp2 is predicted to be periplasmic and *N. gonorrhoeae* LdcA previously was reported to  
532 be periplasmic (Lenz, 2017, Fridrich, 2014).

533 Our results demonstrated, for the first time, that *F. tularensis* LdcA directly acts on the  
534 TCT tetrapeptide and the reducing PG monomer. More importantly, we demonstrated that *F.*  
535 *tularensis* LdcA directly cleaves PG pentapeptides to tripeptides, without a prior cleavage event  
536 by a D,D-carboxypeptidase/penicillin binding protein (PBP), such as DacD, and that FTL1678  
537 cleaves TCT dimers with 4-3 and 3-3 cross links, highlighting that *F. tularensis* LdcA is a multi-  
538 functional enzyme that exhibits both L,D-carboxypeptidase and L,D-endopeptidase activities  
539 (Table 1 and Table S2). It should be noted that although *N. gonorrhoeae* LdcA also has been  
540 reported to have L,D-endopeptidase activity, this activity was shown to cleave tetra-tri and tri-tri  
541 dimers, but not tetra-tetra dimers, suggesting a specificity for 3-3 cross linked dimers (Lenz,  
542 2017). Interestingly, only two previous studies have examined putative *F. tularensis* PG  
543 modifying enzymes and both studies primarily focused on the role of an *F. tularensis* DacD  
544 ortholog in virulence, with no PG activity assays to confirm function (Spidlova, 2018, Kijek,  
545 2019). In our PG cleavage analysis, *F. tularensis* LdcA demonstrated the highest specific  
546 activity on disaccharide-tetrapeptide PG substrates (GlcNAc-anhydroMurNAc-L-Ala- $\gamma$ -D-Glu-  
547 *meso*-A<sub>2</sub>pm-D-Ala [TCT] and GlcNAc-MurNAc-L-Ala- $\gamma$ -D-Glu-*meso*-A<sub>2</sub>pm-D-Ala [reducing  
548 PG monomer]), followed by cleavage of pentapeptide PG substrates (MurNAc-L-Ala- $\gamma$ -D-Glu-  
549 *meso*-A<sub>2</sub>pm-D-Ala-D-Ala and UDP-MurNAc-L-Ala- $\gamma$ -D-Glu-*meso*-A<sub>2</sub>pm-D-Ala-D-Ala).  
550 Despite high specific activity of *F. tularensis* LdcA on tetrapeptide attached to the disaccharide,  
551 *F. tularensis* LdcA demonstrated approximately 6-times lower specific activity on free



552 tetrapeptide (no sugars) (Table 1). In contrast, *E. coli* LdcA has been shown to have the highest  
553 specific activity on free tetrapeptide, monosaccharide-tetrapeptide (MurNAc-L-Ala- $\gamma$ -D-Glu-  
554 *meso*-A<sub>2</sub>pm-D-Ala), and monosaccharide tetrapeptide linked to a glycan lipid carrier (UDP-  
555 MurNAc-tetrapeptide) (Templin, 1999), but is unable to cleave dimeric mucopeptides.  
556 Additionally, *F. tularensis* LdcA was active against different forms of dimers (two TCT  
557 monomers carrying tri- or tetrapeptide chains connected either by a 4-3 or a 3-3- crosslink) but  
558 was not active on the PG polymer. The cleavage of the latter dimers indicated that *F. tularensis*  
559 LdcA possesses both L,D-endopeptidase and L,D,-carboxypeptidase activities and could cleave  
560 the A<sub>2</sub>pm-A<sub>2</sub>pm, A<sub>2</sub>pm-D-Ala and A<sub>2</sub>pm-Gly peptide bonds (L-D bonds in all cases) present in  
561 these dimers, with more or less efficacy.

562         Previous studies have shown that Ldc orthologs are important for bacterial morphology  
563 and membrane integrity. Deletion of the *ldc* orthologs *csd6* from *H. pylori* (Sycuro, 2013) and  
564 *pgp2* from *C. jejuni* (Frirdich, 2014) resulted in loss of helical morphology. Here, we  
565 demonstrated that FTL1678 is essential for maintaining both the size (width) and the  
566 coccobacillus morphology of *F. tularensis*, as  $\Delta$ FTL1678 bacteria were significantly-smaller  
567 than WT and exhibited a more-rounded, cocci shape than WT (Figure 3). Further evidence for  
568 the role of *F. tularensis* LdcA in modifying and recycling PG, which impacts bacterial  
569 morphology, is provided by TEM images of  $\Delta$ FTL1678 bacteria that have prominent three-  
570 layered structures at their periphery, including a thick middle layer (presumably PG), compared  
571 to WT (Figure 3). In  $\Delta$ FTL1678 bacteria, it is possible that loss of LdcA activity may have  
572 reduced PG recycling or may have affected the breakdown of existing PG (important for cell  
573 division), resulting in a buildup of pentapeptides or tetrapeptides that are highly-crosslinked.  
574 Our lab and others have repeatedly attempted to isolate and analyze *F. tularensis* PG but these

575 attempts have not been successful. As such, we can only speculate on the true nature of the thick  
576 PG and OM layers in  $\Delta FTL1678$  (Figure 3).

577 Because  $\Delta FTL1678$  bacteria were found to have a thicker OM (Figure 3C), a prominent  
578 middle layer in their envelope (presumably PG; Figure 3B), and an altered cell morphology  
579 (Figure 3B), we investigated differences in WT and  $\Delta FTL1678$  susceptibility to various  
580 antibiotics, detergents, and stressors. Vancomycin and lysozyme, usually not effective against  
581 Gram-negative species due to their inability to penetrate the OM, inhibited  $\Delta FTL1678$  growth  
582 (Table 2), indicating increased permeability of the  $\Delta FTL1678$  OM. Vancomycin, in particular,  
583 may have been effective on  $\Delta FTL1678$  because its mechanism of action includes binding to the  
584 two terminal D-Ala-D-Ala residues of PG pentapeptide chains and preventing cross-linking of  
585 monomers.  $\Delta FTL1678$  may have increased amounts of pentapeptides present in its PG,  
586 providing more targets for vancomycin action. Similarly, ampicillin inhibits bacterial  
587 transpeptidases, which blocks cross-linking of peptide side chains of PG strands. Taken  
588 together, the enhanced susceptibility of  $\Delta FTL1678$  bacteria to vancomycin and ampicillin  
589 supports the role of *F. tularensis* LdcA as a PG-modifying enzyme. Conversely,  $\Delta FTL1678$  was  
590 more resistant to antibiotics and molecules that must cross the IM to exert their toxic effects,  
591 including gentamicin, tetracycline, chloramphenicol, ciprofloxacin, and ethidium bromide (Table  
592 2), suggesting that  $\Delta FTL1678$  bacteria have a less permeable IM. Indeed, decreased  
593 permeability of the IM and altered activity of IM efflux pumps may help explain the more  
594 electron-dense staining of  $\Delta FTL1678$ , compared to WT (Figure 3). Many mechanisms may  
595 explain why  $\Delta FTL1678$  bacteria were more resistant to other stressors, including H<sub>2</sub>O<sub>2</sub>, high salt,  
596 and low pH, including increased expression/activity of chaperone proteins, efflux pumps,  
597 antioxidant/scavenger proteins, and membrane stabilizing proteins (Mishra & Imlay, 2012,

598 Knodler *et al.*, 2003, Lund *et al.*, 2014). Future studies are needed to define these mechanisms,  
599 which are likely to be complex.

600 The extreme virulence of Type A *F. tularensis* and its designation as a Tier 1 Select  
601 Agent highlight why studies to identify *F. tularensis* virulence factors and the development of  
602 new vaccines is important. In this study, we identified the role of a previously unstudied protein,  
603 FTL1678, in PG recycling, PG integrity, and bacterial morphology. In addition, we found that  
604 FTL1678 was required for *F. tularensis* LVS virulence and demonstrated that  $\Delta FTL1678$   
605 conferred 80% protection against fully-virulent, Type A *F. tularensis* SchuS4 pulmonary  
606 challenge. Further studies are needed to determine specific immune responses induced by  
607  $\Delta FTL1678$  immunization, as well as to identify the most effective immunization regimen (*e.g.*,  
608 number of immunizations and time between immunizations).

609 Finally, given our findings that PG maintenance and recycling are important for *F.*  
610 *tularensis* virulence, and that future studies may reveal additional PG-associated enzymes, we  
611 used bioinformatic approaches to predict other proteins involved in *F. tularensis* PG synthesis  
612 and recycling (Figure 9). While at least seven PG synthesis and recycling genes/proteins  
613 orthologs could not be identified, 22 putative PG synthesis and recycling proteins were identified  
614 in *F. tularensis* (Figure 9). Of these, only DacD (FTL1060/FTT1029) has been studied in *F.*  
615 *tularensis*. Given our observed attenuation of  $\Delta FTL1678$ , future studies to better understand PG  
616 synthesis and recycling pathways may offer more opportunities to better understand the virulence  
617 of *F. tularensis* and other intracellular pathogens. Characterization of other proteins involved in  
618 PG pathways may provide clues as to why *F. tularensis* LdcA is OM-associated or periplasmic  
619 and encodes both L,D-carboxypeptidase and L,D-endopeptidase activities.

620

621

## 622 **Experimental Procedures**

### 623 *Bacterial strains and culture conditions*

624 *F. tularensis* Type A strain SchuS4 and *F. tularensis* Type B strain LVS were obtained from BEI  
625 Resources and cultured as previously described (Wu, 2016, Ren, 2014). All experiments with  
626 SchuS4 were performed under BSL3 containment conditions at the University of Toledo Health  
627 Science Campus BSL3 laboratory. Routine *F. tularensis* cultures were grown overnight at 37°C  
628 with 5% CO<sub>2</sub> on supplemented Mueller-Hinton agar (sMHA): Mueller-Hinton broth powder  
629 (Becton Dickinson) was mixed with 1.6% (wt/vol) Bacto Agar (Becton Dickinson), autoclaved,  
630 and further supplemented with 2.5% (vol/vol) bovine calf serum (Hyclone), 2% (vol/vol)  
631 IsoVitaleX (Becton Dickinson), 0.1% (wt/vol) glucose, and 0.025% (wt/ vol) iron  
632 pyrophosphate. For mouse infections, *F. tularensis* was first grown on sMHA then transferred to  
633 Brain Heart Infusion agar (BHI; Becton Dickinson). Chocolate agar for mutant strain generation  
634 was prepared by mixing Mueller-Hinton broth powder with 1.6% (wt/vol) agar, 1% (wt/vol)  
635 tryptone, and 0.5% (wt/vol) sodium chloride, autoclaved, and further supplemented with 1%  
636 (wt/vol) hemoglobin and 1% (vol/vol) IsoVitaleX. For macrophage infections, *F. tularensis* was  
637 first grown on sMHA then transferred to modified chocolate agar: Mueller-Hinton broth powder  
638 was mixed with 1.6% (wt/vol) Bacto Agar, 1% hemoglobin (wt/vol), and 1% (vol/vol)  
639 IsoVitaleX. All growth curves were performed in sMHB: Mueller-Hinton broth powder was  
640 mixed with 182 μg ml<sup>-1</sup> calcium chloride dihydrate, and 210 μg ml<sup>-1</sup> magnesium chloride  
641 hexahydrate, 0.1% (wt/vol) glucose, 0.025% (wt/vol) iron pyrophosphate, and 2% (vol/vol)  
642 IsoVitaleX. All bacterial strains and plasmids are listed in Table S7. *E. coli* S17-1 and *E. coli*

643 NEB10- $\beta$  were grown in Luria Bertani (LB) broth or on LB agar at 37°C, supplemented as  
644 needed with antibiotics.

645

#### 646 *Sequence alignments and bioinformatic predictions*

647 Amino acid alignments of *F. tularensis* subsp. *holarctica* FTL\_1678, *F. tularensis* subsp.  
648 *tularensis* FTT\_0101, *E. coli* LdcA (BAA36050.1), *P. aeruginosa* LdcA (Q9HTZ1), *N.*  
649 *gonorrhoeae* LdcA (YP\_208343.1), and *C. jejuni* Pgp2 (WP\_002856863) were performed using  
650 Clustal Omega (<https://www.ebi.ac.uk/Tools/msa/clustalo/>) and MView  
651 (<https://www.ebi.ac.uk/Tools/msa/mview/>). Pairwise sequence alignments were performed and  
652 amino acid identities among Ldc homologs were calculated by EMBOSS Needle  
653 ([https://www.ebi.ac.uk/Tools/psa/emboss\\_needle/](https://www.ebi.ac.uk/Tools/psa/emboss_needle/)). The Prokaryotic Genome Analysis Tool  
654 (PGAT) (<http://tools.uwgenomics.org/pgat/>), BlastP, and BlastX analyses  
655 (<http://blast.ncbi.nlm.nih.gov>) were used to identify *F. tularensis* homologues. Bacterial protein  
656 sub-localization was predicted by PSORTb version 3.0.2 (<https://www.psorth.org/psorth/>).  
657 Protein signal sequence prediction was performed by LipoP version 1.0  
658 (<http://www.cbs.dtu.dk/services/LipoP/>) and SignalP version 4.1  
659 (<http://www.cbs.dtu.dk/services/SignalP-4.1/>).

660

#### 661 *Expression and purification of recombinant FTL1678 and FTT0101*

662 *F. tularensis* LVS and SchuS4 genomic DNA were extracted using phenol/chloroform/isoamyl  
663 alcohol (Fisher Bioreagents). *FTL1678* and *FTT0101*, without signal sequences (amino acid  
664 residues 1-29), were PCR-amplified from LVS and SchuS4 genomic DNA, respectively, using  
665 High Fidelity Platinum Taq Polymerase (Life Technologies), and primers 5'FTL1678\_BamHI

666 and 3'FTL1678\_XhoI and 5'FTT0101\_BamHI and 3'FTT0101\_XhoI, respectively (Table S8).  
667 Amplicons and pPROEX HTb were double-digested with BamHI and XhoI, ligated using T4  
668 DNA ligase, and transformed into NEB 10- $\beta$  *E. coli*. Plasmids were purified using the Qiagen  
669 QIAprep Spin Miniprep kit and diagnostic PCR was performed to confirm presence and correct  
670 size of the insert. DNA sequencing was performed to confirm insert integrity and plasmid  
671 constructs were transformed into Rosetta DE3 *E. coli* (Millipore) for protein expression.  
672 Recombinant proteins were expressed and purified as previously described (Ren, 2014) with  
673 some modifications. Bacteria were grown in LB-amp to an OD<sub>600</sub> of 0.4, protein expression was  
674 induced for 2 h by the addition of isopropyl  $\beta$ -D-thiogalactopyranoside (IPTG) to a final  
675 concentration of 100  $\mu$ M, bacteria were pelleted by centrifugation, and frozen overnight at -80°C  
676 to aid in lysis. Cell pellets were suspended in 10 mM Tris, 500 mM NaCl, and 10 mM  
677 imidazole, pH 8.0, sonicated on ice for 10 min with 30 sec intervals, insoluble material was  
678 removed by centrifugation at 8,000  $\times$  g, and supernatants were collected for affinity purification  
679 over pre-equilibrated nickel-nitrilotriacetic acid (Ni-NTA) agarose (Qiagen) columns. Eluted  
680 recombinant proteins were concentrated in Amicon Ultra-4 centrifugal filter units with 30-kDa  
681 cutoff (Millipore), concentrations were determined using the DC BCA protein assay (BioRad),  
682 and purity was assessed by SDS-PAGE and Imperial protein staining (Thermo Scientific). An  
683 empty vector construct also was expressed and purified as a control in enzymatic assays.

684

#### 685 *Site-directed mutagenesis of recombinant FTL1678*

686 The QuikChange Lightning site-directed mutagenesis kit (Agilent) was used to generate single  
687 amino acid, double amino acid, and triple amino acid mutations in the FTL1678 putative active  
688 site residues S134, E239, and H308. Three separate QuikChange reactions were performed in a

689 thermocycler using purified plasmid DNA from pFNLTP6-gro-*ftl1678*-6xHis and three primer  
690 sets to individually mutate Ser134 to Ala (S134A), Glu239 to Ala (E239A), and His308 to Ala  
691 (H308A): a400g\_g401c\_5' and a400g\_g401c\_3'(S134), a716c\_5' and a716c\_3' (E239), and  
692 c922g\_a923c\_5' and c922g\_a923c\_3'(H308) (Table S8). Following amplification, products  
693 were digested with DpnI and immediately transformed into NEB 10- $\beta$  *E. coli*. Transformants  
694 were selected on LB-kan overnight, plasmids were purified for individual clones, and DNA  
695 sequencing was performed to confirm individual mutations. The resulting plasmids were named  
696 pFNLTP6-gro-*ftl1678*-S134A-6xHis, pFNLTP6-gro-*ftl1678*-E239A-6xHis, and pFNLTP6-gro-  
697 *ftl1678*-H308A-6xHis (Table S7). To generate the catalytic triad point mutant complement  
698 strains, S134A, E239A, and H308A, pFNLTP6-gro-*ftl1678*-S134A-6xHis, pFNLTP6-gro-  
699 *ftl1678*-E239A-6xHis, and pFNLTP6-gro-*ftl1678*-H308A-6xHis were individually transformed  
700 into kan-cured  $\Delta$ *FTL1678* by electroporation, transformants were selected on sMHA-kan10, and  
701 expression of S134A, E239A, and H308A were confirmed by immunoblot analysis. To generate  
702 double and triple active site mutants for recombinant protein expression, three separate  
703 QuikChange reactions were performed using purified plasmid DNA from pPROEX Htb-  
704 *FTL1678* as described above, using the same three primer sets to mutate S134, E239, and H308.  
705 DNA sequencing was performed to confirm individual mutations. Plasmids were named  
706 pPROEX Htb-*ftl1678*-S134A, pPROEX Htb-*ftl1678*-E239A, and pPROEX Htb-*ftl1678*-H308A  
707 (Table S7). Three separate QuikChange reactions were performed as described above to  
708 generate double mutants. Purified plasmid DNA from pPROEX Htb-*ftl1678*-S134A was  
709 amplified with a716c\_5' and a716c\_3' to generate an S134A/E239A double mutant and  
710 separately with c922g\_a923c\_5' and c922g\_a923c\_3' to generate an S134A/H308A double  
711 mutant. Purified plasmid DNA from pPROEX Htb-*ftl1678*-E239A was amplified with

712 c922g\_a923c\_5' and c922g\_a923c\_3' to generate an E239A/H308A double mutant.  
713 Transformants were selected on LB-kan overnight, plasmids were purified for individual clones,  
714 and DNA sequencing was performed to confirm double mutations. The resulting plasmids were  
715 named pPROEX Htb-*ftl1678*-S134A/E239A, pPROEX Htb-*ftl1678*-S134A/H308A, and  
716 pPROEX Htb-*ftl1678*-E239A/H308A. A final QuikChange reaction was performed to generate  
717 the triple active site mutant, S134A/E239A/H308A. Purified plasmid DNA from pPROEX Htb-  
718 *ftl1678*-S134A/E239A was amplified using the primer set c922g\_a923c\_5' and c922g\_a923c\_3',  
719 transformants were selected on LB-kan overnight, plasmids were purified for individual clones,  
720 DNA sequencing was performed to confirm the triple mutation and the plasmid was named  
721 pPROEX Htb-*ftl1678*-S134A/E239A/H308A (Table S7). All four plasmid constructs were  
722 transformed into Rosetta DE3 *E. coli* for protein expression. Recombinant proteins were  
723 expressed and purified as described above.

724

#### 725 *Enzymatic assays for FTL1678/FTT0101 activity*

726 FTL1678 and FTT0101 recombinant protein activities toward various PG-related compounds  
727 were tested in 50 µl reaction mixtures containing 50 mM Tris-HCl, pH 8.0, 0.1 mM substrate,  
728 and partially purified enzyme stock (10 µl in 1 M NaCl, 10 mM Tris, pH 8.0). Mixtures were  
729 incubated at 37°C and reactions were stopped by freezing. Depending on the substrate used, the  
730 amount of partially purified protein varied from 0.9 to 5 µg per assay and incubation time varied  
731 from 30 min to 4 h. Substrate and reaction products were separated by HPLC on an ODS-  
732 Hypersil 3 µm particle-size C18 column (250 × 4.6 mm; Thermo Scientific). Elutions were  
733 performed with 50 mM sodium phosphate buffer, pH 4.5, with or without application of a linear  
734 gradient of methanol (from 0 to 20% in 80 min), at a flow rate of 0.5 ml/min. Peaks were



735 detected by measuring the absorbance at 207 nm or at 262 nm for UDP-containing nucleotide  
736 precursors. Identification of reaction products was based on their retention times, compared to  
737 authentic standards, as well as on their amino acid and amino sugar composition, determined  
738 with a Hitachi model L8800 analyzer (Sciencetec) after hydrolysis of samples in 6 M HCl for 16  
739 h at 95°C. Enzyme activity was calculated by integration of peaks corresponding to the  
740 substrates and products. To ensure linearity, substrate consumption was < 20% in all cases. The  
741 amounts of D-Ala and D-Ala-D-Ala released during the reactions also were determined by  
742 injection of aliquots of these reaction mixtures in the Hitachi amino acid analyzer. FTL1678  
743 double and triple active site mutants were tested using the same conditions, with the incubation  
744 time being prolonged up to 18h.

745

#### 746 *Peptidoglycan precursors and muropeptides*

747 UDP-MurNAc-pentapeptide precursors containing either *meso*-diaminopimelic acid (A<sub>2</sub>pm) or  
748 L-lysine were prepared by enzymatic synthesis using purified Mur ligases, and UDP-MurNAc-  
749 tetrapeptides were generated by treatment of the UDP-MurNAc-pentapeptide precursors with  
750 purified *E. coli* PBP5 DD-carboxypeptidase as previously described (Herve, 2007). MurNAc-  
751 peptides were obtained by mild acid hydrolysis of UDP-MurNAc-peptides (0.1 M HCl, 100°C,  
752 15 min) and were not reduced and thus purified as a mixture of the two  $\alpha$  and  $\beta$  anomers (Blanot,  
753 1983). Free peptides were prepared by cleavage of MurNAc-peptides with *E. coli* AmiD *N*-  
754 acetylmuramoyl-L-alanine amidase (Pennartz, 2009). The *E. coli* peptidoglycan polymer was  
755 purified from a  $\Delta lpp$  mutant strain that does not express the Lpp lipoprotein (Leulier, 2003).  
756 GlcNAc-1,6-anhydro-MurNAc-L-Ala- $\gamma$ -D-Glu-*meso*-A<sub>2</sub>pm-D-Ala (TCT) and its dimer (two  
757 cross-linked TCT monomers) were produced by digestion of peptidoglycan with *E. coli* SltY

758 lytic transglycosylase and the non-anhydro forms of these monomer and dimer were generated  
759 by digestion of the polymer with mutanolysin (Stenbak, 2004). All these compounds were  
760 HPLC-purified (Table S1) and their composition was controlled by amino acid and amino sugar  
761 content analysis and/or by MALDI-TOF mass spectrometry.

762

### 763 *Generation of F. tularensis gene deletion mutants*

764 *F. tularensis* isogenic deletion mutants were generated by homologous recombination as  
765 previously described (Wu, 2015). Briefly, 500-bp regions upstream and downstream from the  
766 gene of interest (*FTL1678* or *FTT0101*) were PCR-amplified from *F. tularensis* genomic DNA  
767 using the following primers: *FTL1678\_A* and *FTL1678\_B*; *FTL1678\_C* and *FTL1678\_D*;  
768 *FTT0101\_A* and *FTT0101\_B*; *FTT0101\_C* and *FTT0101\_D* (Table S8). A FLP recombination  
769 target (FRT)-flanked Pfn-kanamycin resistance cassette, FRT-Pfn-kan-FRT, was PCR amplified  
770 from pLG66a (Gallagher, 2008) and splicing overlap extension PCR (SOE PCR) was used to  
771 join the upstream (A-B) and downstream (C-D) regions with FRT-Pfn-kan-FRT, which replaced  
772 the gene of interest. The resulting insert and a suicide plasmid, pTP163 (Robertson, 2013), were  
773 digested with *ApaI* (New England Biolabs), and ligated using T4 DNA ligase (New England  
774 Biolabs). Gene deletion constructs were transformed into NEB10- $\beta$  *E. coli* (New England  
775 Biolabs), sequence-verified, transformed into *E. coli* S17-1, and conjugation was performed with  
776 *F. tularensis* LVS on sMHA plates. Conjugants were recovered on chocolate agar supplemented  
777 with 200  $\mu\text{g ml}^{-1}$  hygromycin and 100  $\mu\text{g ml}^{-1}$  polymyxin B. Individual mutants were selected  
778 by sequential plating on sMHA supplemented with 10  $\mu\text{g ml}^{-1}$  kanamycin (sMHA-kan10),  
779 sMHA-kan10 with 8% (wt/vol) sucrose, and final replica plating onto sMHA containing either

780 200  $\mu\text{g ml}^{-1}$  hygromycin (sMHA-hyg200) or sMHA-kan10. Hyg-sensitive and kan-resistant  
781 colonies were sequence verified (referred to hereafter as either  $\Delta FTL1678$  or  $\Delta FTT0101$ ).

782

### 783 *FTL1678* complementation *in trans*

784 Complementation *in trans* was performed as previously described, with some modifications  
785 (Wu, 2016). *FTL1678* was PCR-amplified from *F. tularensis* LVS using primers  
786 5'FTL1678\_NEBuilder and 3'FTL1678\_NEBuilder (Table S8), pQE-60 (Qiagen) was double-  
787 digested with NcoI and BglII (New England Biolabs), and the NEBuilder HiFi DNA Assembly  
788 Cloning kit was used to ligate the *FTL1678* amplicon and digested pQE-60. The construct was  
789 transformed into NEB 10- $\beta$  *E. coli* and transformants were selected on LB agar supplemented  
790 with 100  $\mu\text{g ml}^{-1}$  ampicillin (LB-amp). Plasmids were purified from individual clones using the  
791 Qiagen QIAprep Spin Miniprep kit (Qiagen), diagnostic PCR was performed to confirm insert  
792 presence and correct size, and DNA sequencing was performed to verify insert integrity. The  
793 resulting construct, *FTL1678* with a C-terminal 6 $\times$ histidine tag, was PCR-amplified using  
794 primers 5'FTL1678\_pFNLTP6 and 3'FTL1678\_pFNLTP6 (Table S8), the amplicon and  
795 pFNLTP6-gro-GFP (Maier, 2004) were double-digested with XhoI and BamHI (New England  
796 Biolabs), and ligated using T4 DNA ligase. The construct, pFNLTP6-gro-*FTL1678*-6xHis, was  
797 transformed into NEB10- $\beta$  *E. coli*, transformants were selected on LB plates supplemented with  
798 50  $\mu\text{g ml}^{-1}$  kanamycin (LB-kan), and DNA sequencing was performed to verify *FTL1678*-6xHis  
799 integrity. Next, the kan resistance gene was removed from  $\Delta FTL1678$  by suspending the strain  
800 in 0.5 M sucrose (in 1 mM EDTA, pH 7.5), washing three times, and electroporating the shuttle  
801 plasmid pTP405 (Robertson, 2013), which encodes the Flp recombinase to remove FRT-Pfn-  
802 kan-FRT from the genome. Bacteria were grown overnight on sMHA-hyg200, hyg-resistant

803 transformants were passaged three times on sMHA, then transformants were replica plated onto  
804 sMHA-hyg200 and sMHA-kan10 to confirm sensitivity to both antibiotics (kan-cured  
805  $\Delta FTL1678$ ). pFNLTP6-gro-*FTL1678*-6×His was transformed into kan-cured  $\Delta FTL1678$  by  
806 electroporation, transformants were selected on sMHA-kan10, and FTL1678 expression was  
807 confirmed by immunoblot analysis (referred to hereafter as  $\Delta FTL1678$  *trans*-complement).

808

### 809 *C. jejuni* *pgp2* complementation in trans

810 Complementation of *C. jejuni* *pgp2* (CJJ81176\_0915) into  $\Delta FTL1678$  was performed as  
811 described above, with several modifications. The *pgp2* gene, with the FTL1678 signal sequence  
812 (amino acid residues 1-29) in place of the native Pgp2 signal sequence (amino acid residues 1-  
813 18), was synthesized and inserted in pQE-60 by GenScript USA. pQE-60-*pgp2* was transformed  
814 into NEB10- $\beta$  *E. coli* and selection was performed on LB-amp. Pgp2-6×His was amplified from  
815 pQE-60 using primers 5'FTL1678\_pFNLTP6 and 3'FTL1678\_pFNLTP6 (Table S8), the  
816 amplicon was ligated into similarly digested pFNLTP6, pFNLTP6-gro-*pgp2*-6×His was  
817 transformed into NEB10- $\beta$  *E. coli*, and transformants were selected on LB-kan. Plasmids were  
818 purified from kan-resistant transformants, sequence verified, then electroporated into kan-cured  
819  $\Delta FTL1678$ . Pgp2 expression was confirmed by immunoblot analysis.

820

### 821 *Mouse infections*

822 All animal studies were approved by the University of Toledo Institutional Animal Care and Use  
823 Committee (IACUC). Mouse infections were performed as previously described (Huntley,  
824 2008), with some modifications. Briefly, *F. tularensis* strains were grown on sMHA overnight,  
825 transferred to BHI agar for an additional 20-24 h, suspended in sterile PBS, and diluted to the

826 desired concentration (20 to  $10^9$  CFU/20  $\mu$ l) based on previous OD<sub>600</sub> measurements and  
827 bacterial enumeration studies. Groups of 4-8 female C3H/HeN mice (6-8 weeks old; Charles  
828 River Laboratories) were anesthetized with a ketamine-xylazine sedative and intranasally (i.n.)  
829 infected with 20  $\mu$ l of prepared bacterial suspensions. Bacterial inocula were serially-diluted and  
830 plated in quadruplet on sMHA to confirm CFUs. For survival studies, mice were monitored  
831 daily, for signs of disease, with health status scores (scale of 1-5, with 1 indicating healthy and 5  
832 indicating mouse found dead) being recorded for each mouse. Moribund mice were humanely  
833 euthanized to minimize suffering. To quantitate bacterial tissue burdens, groups of 4 mice were  
834 euthanized on days 2 and 5 post-infection, blood was collected by cardiac puncture and plated  
835 onto sMHA, lungs, livers, and spleens were aseptically harvested, homogenized, 25  $\mu$ l of  
836 PBS/mg of tissue was added to each tissue, serially-diluted, and dilutions were plated onto  
837 sMHA. Following 72 h of incubation, the number of colonies per plate were counted and  
838 CFU/mg (tissues) or CFU/ml (blood) were calculated based on tissue weight and dilution factor.  
839 For immunization and challenge studies, groups of 4-10 mice were i.n. immunized with either  
840 100-300 CFU LVS or  $10^4$ - $10^9$  CFU  $\Delta$ FTL1678, boosted 3-4 weeks later with either  $10^3$  CFU  
841 LVS or  $10^9$  CFU  $\Delta$ FTL1678, transported to the ABSL3 facility 3-weeks later, and i.n. challenged  
842 with 20-120 CFU of *F. tularensis* SchuS4. Mice were monitored daily for signs of disease with  
843 health status scores being recorded for each mouse.

844

#### 845 *Membrane integrity testing*

846 Sensitivity of LVS,  $\Delta$ FTL1678, FTL1678 *trans*-complement, and the Pgp2 *trans*-complement to  
847 various antibiotics, detergents, dyes, and cell wall stressors was determined by disk diffusion  
848 assays or in liquid cultures, as previously described (Wu, 2016), with some modifications.

849 Bacterial strains were grown on either sMHA or sMHA-kan10 ( $\Delta FTL1678$  and complemented  
850 strains), scraped and resuspended in sterile PBS, adjusted to an  $OD_{600}$  of 0.2 (approx.  $9 \times 10^7$   
851 CFU/ml), diluted 1:1 in PBS, and 100  $\mu$ l was plated onto sMHA plates using cotton tipped  
852 applicators (Puritan). Sterile paper disks (Whatman; 0.8 mm thick, 6.5 mm in diameter) were  
853 placed in the center of each plate and antibiotics, detergents, or dyes were added to the disks at  
854 the concentrations listed in Table 2. Antibiotics tested were: gentamicin (Gibco), tetracycline  
855 (Fisher Scientific), chloramphenicol (Acros Organics), ciprofloxacin (Oxoid), ampicillin (Fisher  
856 Scientific), vancomycin (Acros Organics), bacitracin (Oxoid), bacitracin (Oxoid), ciprofloxacin  
857 (Oxoid), and polymyxin B (MP Biomedicals). Detergents tested were: sodium dodecyl sulfate  
858 (SDS; anionic; Fisher Scientific), Triton X-100 (nonionic; Acros Organics), cetyltrimethyl  
859 ammonium bromide (CTAB; cationic; MP Biomedicals), 3-cholamidopropyl dimethylammonio  
860 1-propanesulfonate (CHAPS; zwitterionic; Thermo Scientific). In addition, sensitivity to  
861 ethidium bromide (Thermo Scientific) and lysozyme (Thermo Fisher) also was tested. After 48  
862 h, diameters of zones of inhibition around the disks were measured, with experiments performed  
863 in triplicate to confirm reproducibility. Zones of inhibition were averaged, standard deviations  
864 calculated, and all data rounded to the nearest whole number. For liquid cultures, bacteria were  
865 suspended in sMHB, adjusted to  $OD_{600}$  0.4, and 5 ml of each bacterial suspensions was  
866 inoculated into 100 ml of either sMHB or sMHB with 5 mM hydrogen peroxide ( $H_2O_2$ ), 5%  
867 sodium chloride (NaCl), or pH 5.5 (pH of sMHB is 6.5). Cultures were grown in triplicate at  
868  $37^\circ C$  with rotation at 180 rpm for 24 h with  $OD_{600}$  readings recorded every 4 h.

869

870 *Electron microscopy*

871 Electron microscopy was used to visualize differences in bacterial envelope structure and cell  
872 shape, as previously described (Wu, 2016), with some modifications. WT LVS,  $\Delta FTL1678$ ,  
873 *FTL1678 trans*-complement (*FTL1678 compl*), and the *Pgp2 trans*-complement (*Pgp2 compl*)  
874 were grown overnight in sMHB, approx.  $1 \times 10^9$  CFU of each bacterial strain was pelleted by  
875 centrifugation at  $7000 \times g$  at  $4^\circ\text{C}$ , washed three times in PBS, fixed in 3% (vol/vol)  
876 glutaraldehyde (Electron Microscopy Sciences [EMS]) for approx. 24 h, washed twice in sodium  
877 cacodylate buffer (pH 7.4; EMS) for 10 min, suspended in 1% (wt/vol) osmium tetroxide (EMS)  
878 in s-collidine buffer (pH 7.4; EMS) for 45 min at room temperature (r/t) to stain and fix the  
879 samples, washed two times with sodium cacodylate buffer for 10 min each, and tertiary fixation  
880 was performed using an aqueous saturated solution of uranyl acetate (pH 3.3; EMS) for 45 min  
881 at r/t. Samples were then dehydrated at room temperature using a series of ethanol washes: two  
882 washes with 30% ethanol for 10 min each; two washes with 50% ethanol for 10 min each; two  
883 washes with 95% ethanol for 10 min each; two washes with 100% ethanol for 10 min each; and  
884 two washes with 100% acetone for 10 min each. Samples were then infiltrated with 50%  
885 acetone and 50% embedding media (Hard Plus Resin 812, EMS) for 8 h to overnight at r/t.  
886 Samples were embedded in 100% embedding media (EMS) and allowed to polymerize for 8 h to  
887 overnight at  $85^\circ\text{C}$ , then sectioned at 85-90 nm, and visualized using a Tecnai G2 Spirit  
888 transmission electron microscope (FEI) at 80 kV and Radius 1.3 (Olympus) imaging software at  
889 the University of Toledo Electron Microscopy Facility. For outer membrane (OM) thickness  
890 measurements, individual bacterial cells were analyzed at  $120,000\times$ , multiple measurements (3 to  
891 7 per bacteria) of OM thickness per bacterium were calculated by Radius 1.3 imaging software  
892 using default settings, and average OM thickness per bacterial cell were recorded (WT n=50  
893 bacterial cells;  $\Delta FTL1678$  n=50 bacterial cells; *FTL1678 compl* n=44 bacterial cells; *Pgp2*

894 compl n=33 bacterial cells). For bacterial cell width measurements, individual bacterium were  
895 analyzed at 120,000 $\times$ , cell length and width were calculated using default settings, and the  
896 smallest measurement (width) per bacterium was recorded (Figure 3: WT n=175 bacterial cells,  
897  $\Delta$ FTL1678 n=175 bacterial cells; Figure S7: WT n=119 bacterial cells;  $\Delta$ FTL1678 n=120  
898 bacterial cells; FTL1678 compl n=119 bacterial cells; Pgp2 compl n=119 bacterial cells).  
899 Experiments were performed twice to confirm reproducibility, with two bacterial preparations  
900 fixed, stained, embedded, sectioned, and visualized per experiment.

901

#### 902 *Spheroplasting and sucrose density gradient centrifugation*

903 Spheroplasting, osmotic lysis, and sucrose density gradient centrifugation was performed as  
904 previously described (Huntley, 2007) to determine subcellular localization of FTL1678. Briefly,  
905 the histidine-tagged FTL1678 *trans*-complement was grown in sMHB to an OD<sub>600</sub> of 0.3-0.4,  
906 pelleted at 7500  $\times$  g for 30 min at 10 $^{\circ}$ C, supernatants were removed, pellets were resuspended in  
907 0.75 M sucrose (in 5 mM Tris, pH 7.5) with gentle mixing, 10 mM EDTA (in 5 mM Tris, pH  
908 7.8) was slowly added over 10 min, and the suspension was incubated for 30 min at r/t. After  
909 incubation, lysozyme was slowly added to a final concentration of 200  $\mu$ g ml<sup>-1</sup>, incubated for 30  
910 min at r/t, bacteria were osmotically lysed by dilution into 4.5 $\times$  volumes of molecular-grade  
911 water (Corning) over 11 min with gentle mixing, and incubated for 30 min at r/t. Lysates were  
912 centrifuged at 7,500  $\times$  g for 30 min at 10 $^{\circ}$ C to remove intact cells and cellular debris.  
913 Supernatants were collected and centrifuged at 182,500  $\times$  g for 2 h at 4 $^{\circ}$ C in a F37L 8  $\times$  100  
914 Fiberlite Ultracentrifuge rotor. Following centrifugation, supernatants were removed, membrane  
915 pellets were gently resuspended in 6 ml of resuspension buffer (25% [wt/wt] sucrose, 5 mM Tris,  
916 30 mM MgCl<sub>2</sub>, 1 tablet of Pierce Protease Inhibitor Mini Tablets, EDTA-Free [Thermo



917 Scientific], 5 U Benzonase [Novagen]), suspensions were incubated with gentle mixing for 30  
918 min at room temperature to degrade DNA, and a DC protein assay (Bio-Rad) was performed to  
919 determine total protein yield. Linear sucrose gradients were prepared by layering 1.8 ml each of  
920 sucrose solutions (wt/wt; prepared in 5 mM EDTA, pH 7.5) into 14- by 95-mm ultracentrifuge  
921 tubes (Beckman) in the following order: 55%, 50%, 45%, 40%, 35%, and 30%. Membrane  
922 suspensions were layered on top of each sucrose gradient, with less than 1.5 mg of protein per  
923 gradient. Sucrose gradients were centrifuged in an SW40 swinging bucket rotor (Beckman) at  
924  $256,000 \times g$  for 17 h at 4°C. After centrifugation, 500- $\mu$ l fractions were collected from each  
925 gradient by puncturing the bottom of each tube and allowing fractions to drip into  
926 microcentrifuge tubes. The refractive index of each fraction was determined using a  
927 refractometer (Fisher Scientific) and correlated with a specific density in  $\text{g ml}^{-1}$  (Price, 1982) to  
928 identify outer membrane (OM; 1.17-1.20  $\text{g ml}^{-1}$ ) and inner membrane (IM; 1.13-1.14  $\text{g ml}^{-1}$ )  
929 fractions. Sucrose gradient fractions were examined by immunoblotting as described below.

930

### 931 *Immunoblotting*

932 Whole cell lysates of FTL1678 *trans*-complement were prepared by suspending bacteria  
933 (pelleted at  $7000 \times g$ ) in molecular biology grade water, diluting with SDS-PAGE loading buffer,  
934 and boiling for 10 min. Whole cell lysates, OM fractions, IM fractions, and molecular mass  
935 standards (Precision Plus protein all blue prestained protein standards; BioRad Laboratories)  
936 were separated on a 12.5% polyacrylamide gel, transferred to nitrocellulose, and blots were  
937 incubated overnight in blot block (0.1% (vol/vol) Tween 20 and 2% (wt/vol) bovine serum  
938 albumin in PBS) at 4°C. Immunoblotting was performed using rat polyclonal antiserum specific

939 for either *F. tularensis* OM protein FopA, *F. tularensis* IM protein SecY (Huntley, 2007) or the  
940 Penta-His HRP conjugate antibody (Qiagen).

941

942 *Infections of mouse bone marrow derived macrophages (mBMDMs) and J774A.1 cells*

943 Macrophage culture (37°C with 5% CO<sub>2</sub> unless otherwise indicated) and infections were

944 performed as previously described (Wu, 2016), with some modifications. Bone marrow

945 macrophages were harvested from female C3H/HeN mice. Mice were euthanized by CO<sub>2</sub>

946 asphyxiation and cervical dislocation. Femurs and tibiae of both hind legs were aseptically-

947 harvested, marrow was flushed from each bone with RPMI-1640 (Hyclone) containing 10%

948 heat-inactivated fetal bovine serum ([HI-FBS], Atlanta Biologicals) and 30% supernatants from

949 day 7 L929 cultures (ATCC). Bone marrow was disrupted by repeated passage through a 23-

950 gauge needle and cultured for 4 days. Next, cell media was removed and replaced with RPMI

951 containing 10% HI-FBS and 30% supernatant from day 14 L929 cultures, and cells were

952 cultured for 2 days. Approx. 24 h before infection, media was removed, cells were harvested by

953 scraping and centrifugation at 400 × *g* for 10 min at 10°C, cells were enumerated using a

954 hemocytometer, and diluted to 1x10<sup>5</sup> cells in RPMI containing 10% HI-FBS. J774A.1 cells

955 (ATCC) were cultured in Dulbecco's Modified Eagle Medium ([DMEM], Gibco) containing

956 10% HI-FBS. Approx. 24 h before infection, cells were harvested as described above, seeded

957 into individual wells of 24-well plates (Corning) at a concentration of 1x10<sup>5</sup> cells/well, and

958 incubated overnight. mBMDMs and J774A.1 cells were infected with a multiplicity of infection

959 (MOI) of 100 bacteria to 1 cell (100:1). Following infection, cells were centrifuged at 1,000 × *g*

960 for 10 min at 4°C, incubated at 37°C with 5% CO<sub>2</sub> for 1 h, washed 1× with RPMI (or DMEM),

961 media containing 100 µg ml<sup>-1</sup> gentamicin was added to kill extracellular bacteria, cells were

962 incubated at 37°C with 5% CO<sub>2</sub> for 1 h, washed 1× with RPMI (or DMEM), lysed with 1%  
963 saponin for 4 min, serially diluted in PBS, plated onto sMHA plates, and bacteria were  
964 enumerated (entry) after 48 h. Alternatively, after gentamicin treatment and washing, RPMI (or  
965 DMEM) containing 10% HI-FBS was added to cells and they were incubated for 6 or 24 h,  
966 lysed, serially-diluted, and plated to determine bacterial numbers.

967

### 968 *Statistics*

969 GraphPad Prism6 was used in various statistical analyses, including: differences in antibiotic,  
970 detergent, dye, or lysozyme susceptibility were calculated by one-way ANOVA with multiple  
971 comparisons and the Holm-Sidak post-hoc test; differences in EM measurements were  
972 determined by unpaired t-tests; differences in median time-to-death and percent survival  
973 following *F. tularensis* infection of mice were calculated using the log-rank Mantel-Cox test;  
974 differences in pathology scores of *F. tularensis*-infected tissues were calculated by two-way  
975 ANOVA with multiple comparisons and a Tukey post-hoc test. Differences in lung, liver,  
976 spleen, and blood bacterial burdens from infected mice were calculated by one-way ANOVA  
977 with multiple comparisons using R software.

978

979

### 980 **Acknowledgments**

981 We would like to acknowledge Drs. Joe Dillard and Ryan Schaub (University of Wisconsin-  
982 Madison) for all their help and expertise with peptidoglycan isolation/purification. We would  
983 also like to thank Dr. Erin Gaynor for her generous contribution of *C. jejuni* Pgp2-pGEM

984 plasmid construct. This work was supported by grant R01 AI093351 from the National Institute  
985 of Allergy and Infectious Disease of the National Institutes of Health (NIAID-NIH) to J.F.H.

986

987

## 988 **Data Availability Statement**

989 Data that support the findings of this study are available in the supplementary material of this  
990 article.

991

992

993

994

995

## 996 **References**

997 Blanot, D., Kretsovali A, Abo-Ghalia M, Mengin-Lecreulx D, van Heijenoort J, (1983) Synthesis  
998 of analogues of precursors of bacterial peptidoglycan. In: Peptides. B.a.P. Malon (ed).  
999 Berlin, Germany: Walter de Gruyter, pp. 311-314.

1000 Bouveret, E., Benedetti H, Rigal A, Loret E, Lazdunski C (1999) In vitro characterization of  
1001 peptidoglycan-associated lipoprotein (PAL)-peptidoglycan and PAL-TolB interactions. *J*  
1002 *Bacteriol* **181**: 6306-6311.

1003 Braun, V. (1975) Covalent lipoprotein from the outer membrane of *Escherichia coli*. *Biochim*  
1004 *Biophys Acta* **415**: 335-377.

1005 Braun, V., and Hantke, K. (2019) Lipoproteins: Structure, Function, Biosynthesis. *Subcell*  
1006 *Biochem* **92**: 39-77.

- 1007 Braun, V., Rehn K (1969) Chemical characterization, spatial distribution and function of a  
1008 lipoprotein (murein-lipoprotein) of the *E. coli* cell wall. The specific effect of trypsin on the  
1009 membrane structure. *Eur J Biochem* **10**: 426-438.
- 1010 Braun, V., and Rehn, K. (1969) Chemical characterization, spatial distribution and function of a  
1011 lipoprotein (murein-lipoprotein) of the *E. coli* cell wall. The specific effect of trypsin on the  
1012 membrane structure. *Eur J Biochem* **10**: 426-438.
- 1013 Chaput, C., Ecobichon C, Pouradier N, Rousselle JC, Namane A, Boneca IG (2016) Role of the  
1014 N-Acetylmuramoyl-l-Alanyl Amidase, AmiA, of *Helicobacter pylori* in Peptidoglycan  
1015 Metabolism, Daughter Cell Separation, and Virulence. *Microb Drug Resist* **22**: 477-486.
- 1016 Clavel, T., Germon P, Vianney A, Portalier R, Lazzaroni JC (1998) TolB protein of *Escherichia*  
1017 *coli* K-12 interacts with the outer membrane peptidoglycan-associated proteins Pal, Lpp  
1018 and OmpA. *Mol Microbiol* **29**: 359-367.
- 1019 Das, D., Herve M, Elsliger MA, Kadam RU, Grant JC, Chiu HJ, Knuth MW, Klock HE, Miller  
1020 MD, Godzik A, Lesley SA, Deacon AM, Mengin-Lecreulx D, Wilson IA (2013) Structure  
1021 and function of a novel LD-carboxypeptidase a involved in peptidoglycan recycling. *J*  
1022 *Bacteriol* **195**: 5555-5566.
- 1023 De Pascalis, R., Hahn A, Brook HM, Ryden P, Donart N, Mittereder L, Frey B, Wu TH, Elkins  
1024 KL (2018) A panel of correlates predicts vaccine-induced protection of rats against  
1025 respiratory challenge with virulent *Francisella tularensis*. *PLoS One* **13**: e0198140.
- 1026 de Pedro, M., Cava F (2015) Structural constraints and dynamics of bacterial cell wall  
1027 architecture. *Front Microbiol* **6**: 449.
- 1028 den Blaauwen, T., de Pedro MA, Nguyen-Disteche M, Ayala JA (2008) Morphogenesis of rod-  
1029 shaped sacculi. *FEMS Microbiol Rev* **32**: 321-344.

- 1030 Dennis, D., Inglesby TV, Henderson DA, Bartlett JG, Ascher MS, Eitzen E, Fine AD,  
1031 Friedlander AM, Hauer J, Layton M, Lillibridge SR, McDade JE, Osterholm MT, O'Toole  
1032 T, Parker G, Perl TM, Russell PK, and Tonat K (2001) Tularemia as a biological weapon:  
1033 medical and public health management. *JAMA* **285**: 2763-2773.
- 1034 Denome, S., Elf PK, Henderson TA, Nelson DE, Young KD (1999) *Escherichia coli* mutants  
1035 lacking all possible combinations of eight penicillin binding proteins: viability,  
1036 characteristics, and implications for peptidoglycan synthesis. *J Bacteriol* **181**: 3981-3993.
- 1037 Dhar, S., Kumari H, Balasubramanian D, Mathee K. (2018) Cell-wall recycling and synthesis in  
1038 *Escherichia coli* and *Pseudomonas aeruginosa* - their role in the development of resistance.  
1039 *J Med Microbiol* **67**: 1-21.
- 1040 Ellis, J., Oyston PC, Green M, Titball RW (2002) Tularemia. *Clin Microbiol Rev* **15**: 631-646.
- 1041 Firdich, E., Biboy J, Adams C, Lee J, Ellermeier J, Gielda LD, Dirita VJ, Girardin SE, Vollmer  
1042 W, Gaynor EC (2012) Peptidoglycan-modifying enzyme Pgp1 is required for helical cell  
1043 shape and pathogenicity traits in *Campylobacter jejuni*. *PLoS Pathog* **8**: e1002602.
- 1044 Firdich, E., Vermeulen J, Biboy J, Soares F, Taveirne ME, Johnson JG, DiRita VJ, Girardin SE,  
1045 Vollmer W, Gaynor EC (2014) Peptidoglycan LD-carboxypeptidase Pgp2 influences  
1046 *Campylobacter jejuni* helical cell shape and pathogenic properties and provides the  
1047 substrate for the DL-carboxypeptidase Pgp1. *J Biol Chem* **289**: 8007-8018.
- 1048 Gallagher, L., McKevitt M, Ramage ER, Manoil C (2008) Genetic dissection of the *Francisella*  
1049 *novicida* restriction barrier. *J Bacteriol* **190**: 7830-7837.
- 1050 Glauner, B., Holtje JV, Schwarz U (1988) The composition of the murein of *Escherichia coli*. *J*  
1051 *Biol Chem* **263**: 10088-10095.

- 1052 Guinane, C., Cotter PD, Ross RP, Hill C (2006) Contribution of penicillin-binding protein  
1053 homologs to antibiotic resistance, cell morphology, and virulence of *Listeria*  
1054 *monocytogenes* EGDe. *Antimicrob Agents Chemother* **50**: 2824-2828.
- 1055 Hall, J., Woolard MD, Gunn BM, Craven RR, Taft-Benz S, Frelinger JA, Kawula TH (2008)  
1056 Infected-host-cell repertoire and cellular response in the lung following inhalation of  
1057 *Francisella tularensis* Schu S4, LVS, or U112. *Infect Immun* **76**: 5843-5852.
- 1058 Heidrich, C., Templin MF, Ursinus A, Merdanovic M, Berger J, Schwarz H, de Pedro MA,  
1059 Holtje JV (2001) Involvement of N-acetylmuramyl-L-alanine amidases in cell separation  
1060 and antibiotic-induced autolysis of *Escherichia coli*. *Mol Microbiol* **41**: 167-178.
- 1061 Heidrich, C., Ursinus A, Berger J, Schwarz H, Holtje JV (2002) Effects of multiple deletions of  
1062 murein hydrolases on viability, septum cleavage, and sensitivity to large toxic molecules in  
1063 *Escherichia coli*. *J Bacteriol* **184**: 6093-6099.
- 1064 Herve, M., Boniface A, Gobec S, Blanot D, Mengin-Lecreulx D (2007) Biochemical  
1065 characterization and physiological properties of *Escherichia coli* UDP-N-  
1066 acetylmuramate:L-alanyl-gamma-D-glutamyl-meso-diaminopimelate ligase. *J Bacteriol*  
1067 **189**: 3987-3995.
- 1068 Holtje, J. (1998) Growth of the stress-bearing and shape-maintaining murein sacculus of  
1069 *Escherichia coli*. *Microbiol Mol Biol Rev* **62**: 181-203.
- 1070 Huntley, J., Conley PG, Hagman KE, Norgard MV (2007) Characterization of *Francisella*  
1071 *tularensis* outer membrane proteins. *J Bacteriol* **189**: 561-574.
- 1072 Huntley, J., Conley PG, Rasko DA, Hagman KE, Apicella MA, Norgard MV (2008) Native  
1073 outer membrane proteins protect mice against pulmonary challenge with virulent type A  
1074 *Francisella tularensis*. *Infect Immun* **76**: 3664-3671.

- 1075 Jenkins, C., Wallis R, Allcock N, Barnes KB, Richards MI, Auty JM, Galyov EE, Harding SV,  
1076 Mukamolova GV (2019) The lytic transglycosylase, LtgG, controls cell morphology and  
1077 virulence in *Burkholderia pseudomallei*. *Sci Rep* **9**: 11060.
- 1078 Johnson, J., Fisher JF, Mobashery S (2013) Bacterial cell-wall recycling. *Ann N Y Acad Sci*  
1079 **1277**: 54-75.
- 1080 Jones, C., Napier BA, Sampson TR, Llewellyn AC, Schroeder MR, Weiss DS (2012) Subversion  
1081 of host recognition and defense systems by *Francisella* spp. *Microbiol Mol Biol Rev* **76**:  
1082 383-404.
- 1083 Juan, C., Torrens G, Barcelo IM, Oliver A (2018) Interplay between Peptidoglycan Biology and  
1084 Virulence in Gram-Negative Pathogens. *Microbiol Mol Biol Rev* **82**: e00033-00018.
- 1085 Keim, P., Johansson A, Wagner DM (2007) Molecular epidemiology, evolution, and ecology of  
1086 *Francisella*. *Ann N Y Acad Sci* **1105**: 30-66.
- 1087 Kijek, T., Mou S, Bachert BA, Kuehl KA, Williams JA, Daye SP, Worsham PL, Bozue JA  
1088 (2019) The D-alanyl-d-alanine carboxypeptidase enzyme is essential for virulence in the  
1089 Schu S4 strain of *Francisella tularensis* and a dacD mutant is able to provide protection  
1090 against a pneumonic challenge. *Microb Pathog* **137**: 103742.
- 1091 Kingry, L., Petersen JM (2014) Comparative review of *Francisella tularensis* and *Francisella*  
1092 *novicida*. *Front Cell Infect Microbiol* **4**: 35.
- 1093 Knodler, L.A., Vallance, B.A., Hensel, M., Jackel, D., Finlay, B.B., and Steele-Mortimer, O.  
1094 (2003) *Salmonella* type III effectors PipB and PipB2 are targeted to detergent-resistant  
1095 microdomains on internal host cell membranes. *Mol Microbiol* **49**: 685-704.
- 1096 Korza, H., Bochtler M (2005) *Pseudomonas aeruginosa* LD-carboxypeptidase, a serine peptidase  
1097 with a Ser-His-Glu triad and a nucleophilic elbow. *J Biol Chem* **280**: 40802-40812.



- 1098 Leduc, M., Ishidate K, Shakibai N, Rothfield L (1992) Interactions of *Escherichia coli*  
1099 membrane lipoproteins with the murein sacculus. *J Bacteriol* **174**: 7982-7988.
- 1100 Lenz, J., Hackett KT, Dillard JP (2017) A Single Dual-Function Enzyme Controls the Production  
1101 of Inflammatory NOD Agonist Peptidoglycan Fragments by *Neisseria gonorrhoeae*. *MBio*  
1102 **8**: e01464-01417.
- 1103 Lenz, J.D., Hackett, K.T., and Dillard, J.P. (2017) A Single Dual-Function Enzyme Controls the  
1104 Production of Inflammatory NOD Agonist Peptidoglycan Fragments by *Neisseria*  
1105 *gonorrhoeae*. *MBio* **8**.
- 1106 Leulier, F., Parquet C, Pili-Floury S, Ryu JH, Caroff M, Lee WJ, Mengin-Lecreulx D, Lemaitre  
1107 B (2003) The *Drosophila* immune system detects bacteria through specific peptidoglycan  
1108 recognition. *Nat Immunol* **4**: 478-484.
- 1109 Lund, P., Tramonti, A., and De Biase, D. (2014) Coping with low pH: molecular strategies in  
1110 neutralophilic bacteria. *FEMS Microbiol Rev* **38**: 1091-1125.
- 1111 Maier, T., Havig A, Casey M, Nano FE, Frank DW, Zahrt TC (2004) Construction and  
1112 characterization of a highly efficient *Francisella* shuttle plasmid. *Appl Environ Microbiol*  
1113 **70**: 7511-7519.
- 1114 Mengin-Lecreulx, D., and Lemaitre, B. (2005) Structure and metabolism of peptidoglycan and  
1115 molecular requirements allowing its detection by the *Drosophila* innate immune system. *J*  
1116 *Endotoxin Res* **11**: 105-111.
- 1117 Metz, R., Henning S, Hammes WP (1986a) LD-carboxypeptidase activity in *Escherichia coli*. I.  
1118 The LD-carboxypeptidase activity in ether treated cells. *Arch Microbiol* **144**: 175-180.

- 1119 Metz, R., Henning S, Hammes WP (1986b) LD-carboxypeptidase activity in *Escherichia coli*. II.  
1120 Isolation, purification and characterization of the enzyme from *E. coli* K 12. *Arch*  
1121 *Microbiol* **144**: 181-186.
- 1122 Meyer, K., Addy C, Akashi S, Roper DI, Tame JRH (2018) The crystal structure and oligomeric  
1123 form of *Escherichia coli* L,D-carboxypeptidase A. *Biochem Biophys Res Commun* **499**:  
1124 594-599.
- 1125 Minor, P. (2015) Live attenuated vaccines: Historical successes and current challenges. *Virology*  
1126 **479-480**: 379-392.
- 1127 Mishra, S., and Imlay, J. (2012) Why do bacteria use so many enzymes to scavenge hydrogen  
1128 peroxide? *Arch Biochem Biophys* **525**: 145-160.
- 1129 Nelson, D., Young KD (2000) Penicillin binding protein 5 affects cell diameter, contour, and  
1130 morphology of *Escherichia coli*. *J Bacteriol* **182**: 1714-1721.
- 1131 Park, J., Uehara T (2008) How bacteria consume their own exoskeletons (turnover and recycling  
1132 of cell wall peptidoglycan). *Microbiol Mol Biol Rev* **72**: 211-227.
- 1133 Pazos, M., and Peters, K. (2019) Peptidoglycan. *Subcell Biochem* **92**: 127-168.
- 1134 Pennartz, A., Genereux C, Parquet C, Mengin-Lecreulx D, Joris B (2009) Substrate-induced  
1135 inactivation of the *Escherichia coli* AmiD N-acetylmuramoyl-L-alanine amidase highlights  
1136 a new strategy to inhibit this class of enzyme. *Antimicrob Agents Chemother* **53**: 2991-  
1137 2997.
- 1138 Petrosino, J.F., Xiang, Q., Karpathy, S.E., Jiang, H., Yerrapragada, S., Liu, Y., Gioia, J.,  
1139 Hemphill, L., Gonzalez, A., Raghavan, T.M., Uzman, A., Fox, G.E., Highlander, S.,  
1140 Reichard, M., Morton, R.J., Clinkenbeard, K.D., and Weinstock, G.M. (2006)

- 1141 Chromosome rearrangement and diversification of *Francisella tularensis* revealed by the  
1142 type B (OSU18) genome sequence. *J Bacteriol* **188**: 6977-6985.
- 1143 Price, C. (1982) Centrifugation in density gradients. *Academic Press*: 335-343.
- 1144 Priyadarshini, R., de Pedro MA, Young KD (2007) Role of peptidoglycan amidases in the  
1145 development and morphology of the division septum in *Escherichia coli*. *J Bacteriol* **189**:  
1146 5334-5347.
- 1147 Priyadarshini, R., Popham DL, Young KD (2006) Daughter cell separation by penicillin-binding  
1148 proteins and peptidoglycan amidases in *Escherichia coli*. *J Bacteriol* **188**: 5345-5355.
- 1149 Qin, A., Scott DW, Thompson JA, Mann BJ (2009) Identification of an essential *Francisella*  
1150 *tularensis* subsp. *tularensis* virulence factor. *Infect Immun* **77**: 152-161.
- 1151 Ray, K., Marteyn B, Sansonetti PJ, Tang CM (2009) Life on the inside: the intracellular lifestyle  
1152 of cytosolic bacteria. *Nat Rev Microbiol* **7**: 333-340.
- 1153 Ren, G., Champion MM, Huntley JF (2014) Identification of disulfide bond isomerase substrates  
1154 reveals bacterial virulence factors. *Mol Microbiol* **94**: 926-944.
- 1155 Roberts, L., Powell DA, Frelinger JA (2018) Adaptive Immunity to *Francisella tularensis* and  
1156 Considerations for Vaccine Development. *Front Cell Infect Microbiol* **8**: 115.
- 1157 Robertson, G., Child R, Ingle C, Celli J, Norgard MV (2013) IglE is an outer membrane-  
1158 associated lipoprotein essential for intracellular survival and murine virulence of type A  
1159 *Francisella tularensis*. *Infect Immun* **81**: 4026-4040.
- 1160 Russo, T., MacDonald U, Beanan JM, Olson R, MacDonald IJ, Sauberman SL, Luke NR, Schultz  
1161 LW, Umland TC (2009) Penicillin-binding protein 7/8 contributes to the survival of  
1162 *Acinetobacter baumannii* *in vitro* and *in vivo*. *J Infect Dis* **199**: 513-521.

- 1163 Scheurwater, E., Reid CW, Clarke AJ (2008) Lytic transglycosylases: bacterial space-making  
1164 autolysins. *Int J Biochem Cell Biol* **40**: 586-591.
- 1165 Silhavy, T.J., Kahne, D., and Walker, S. (2010) The bacterial cell envelope. *Cold Spring Harb*  
1166 *Perspect Biol* **2**: a000414.
- 1167 Sjostedt, A. (2007) Tularemia: history, epidemiology, pathogen physiology, and clinical  
1168 manifestations. *Ann N Y Acad Sci* **1105**: 1-29.
- 1169 Spidlova, P., Stojkova P, Dankova V, Senitkova I, Santic M, Pinkas D, Philimonenko V, Stulik J  
1170 (2018) *Francisella tularensis* D-Ala D-Ala Carboxypeptidase DacD Is Involved in  
1171 Intracellular Replication and It Is Necessary for Bacterial Cell Wall Integrity. *Front Cell*  
1172 *Infect Microbiol* **8**: 111.
- 1173 Steiner, D., Furuya Y, Jordan MB, Metzger DW (2017) Protective Role for Macrophages in  
1174 Respiratory *Francisella tularensis* Infection. *Infect Immun* **85**.
- 1175 Stenbak, C., Ryu JH, Leulier F, Pili-Floury S, Parquet C, Herve M, Chaput C, Boneca IG, Lee  
1176 WJ, Lemaitre B, Mengin-Lecreulx D (2004) Peptidoglycan molecular requirements  
1177 allowing detection by the *Drosophila* immune deficiency pathway. *J Immunol* **173**: 7339-  
1178 7348.
- 1179 Sycuro, L., Pincus Z, Gutierrez KD, Biboy J, Stern CA, Vollmer W, Salama NR (2010)  
1180 Peptidoglycan crosslinking relaxation promotes *Helicobacter pylori*'s helical shape and  
1181 stomach colonization. *Cell* **141**: 822-833.
- 1182 Sycuro, L., Rule CS, Petersen TW, Wyckoff TJ, Sessler T, Nagarkar DB, Khalid F, Pincus Z,  
1183 Biboy J, Vollmer W, Salama NR (2013) Flow cytometry-based enrichment for cell shape  
1184 mutants identifies multiple genes that influence *Helicobacter pylori* morphology. *Mol*  
1185 *Microbiol* **90**: 869-883.

- 1186 Templin, M., Ursinus A, Holtje JV (1999) A defect in cell wall recycling triggers autolysis  
1187 during the stationary growth phase of *Escherichia coli*. *EMBO J* **18**: 4108-4117.
- 1188 Typas, A., Banzhaf M, Gross CA, Vollmer W (2011) From the regulation of peptidoglycan  
1189 synthesis to bacterial growth and morphology. *Nat Rev Microbiol* **10**: 123-136.
- 1190 Ursinus, A., Steinhaus H, Holtje JV (1992) Purification of a nocardicin A-sensitive LD-  
1191 carboxypeptidase from *Escherichia coli* by affinity chromatography. *J Bacteriol* **174**: 441-  
1192 446.
- 1193 van Heijenoort, J. (2011) Peptidoglycan hydrolases of *Escherichia coli*. *Microbiol Mol Biol Rev*  
1194 **75**: 636-663.
- 1195 Vollmer, W., and Bertsche, U. (2008) Murein (peptidoglycan) structure, architecture and  
1196 biosynthesis in *Escherichia coli*. *Biochim Biophys Acta* **1778**: 1714-1734.
- 1197 Walburger, A., Lazdunski C, Corda Y (2002) The Tol/Pal system function requires an interaction  
1198 between the C-terminal domain of TolA and the N-terminal domain of TolB. *Mol*  
1199 *Microbiol* **44**: 695-708.
- 1200 Weaver, A.I., Jimenez-Ruiz, V., Tallavajhala, S.R., Ransegnola, B.P., Wong, K.Q., and Dorr, T.  
1201 (2019) Lytic transglycosylases RlpA and MltC assist in *Vibrio cholerae* daughter cell  
1202 separation. *Mol Microbiol* **112**: 1100-1115.
- 1203 Wu, X., Ren G, Gunning WT 3rd, Weaver DA, Kalinoski AL, Khuder SA, Huntley JF (2016)  
1204 FmvB: A *Francisella tularensis* Magnesium-Responsive Outer Membrane Protein that  
1205 Plays a Role in Virulence. *PLoS One* **11**: e0160977.
- 1206 Wu, X., Ren G, Huntley JF (2015) Generating Isogenic Deletions (Knockouts) in *Francisella*  
1207 *tularensis*, a Highly-infectious and Fastidious Gram-negative Bacterium. *Bio Protoc* **5**:  
1208 e1500.
- 1209

1210 **Table 1.** Specific activity and substrate specificity of FTL1678 and FTT0101 enzymes

| Substrate                                                                                             | Specific activity (nmol/min/mg of protein) <sup>a</sup> |                           |
|-------------------------------------------------------------------------------------------------------|---------------------------------------------------------|---------------------------|
|                                                                                                       | FTL1678                                                 | FTT0101                   |
| <b>A<sub>2</sub>pm-containing substrates</b>                                                          |                                                         |                           |
| GlcNAc-anhydroMurNAc-L-Ala-γ-D-Glu- <i>meso</i> -A <sub>2</sub> pm-D-Ala (TCT)                        | 21.5 ± 1.34                                             | 29.0 ± 1.42               |
| GlcNAc-MurNAc-L-Ala-γ-D-Glu- <i>meso</i> - A <sub>2</sub> pm-D-Ala (PG monomer)                       | 15.6 ± 0.79                                             | 24.2 ± 1.80               |
| TCT dimer (4-3 D,D-crosslinkage)                                                                      | 7.7 ± 0.30                                              | 11.8 ± 0.53               |
| MurNAc-L-Ala-γ-D-Glu- <i>meso</i> -A <sub>2</sub> pm-D-Ala                                            | 5.8 ± 0.66                                              | 7.8 ± 1.10                |
| UDP-MurNAc-L-Ala-γ-D-Glu- <i>meso</i> -A <sub>2</sub> pm-D-Ala                                        | 4.6 ± 0.52                                              | 6.3 ± 0.26                |
| L-Ala-γ-D-Glu- <i>meso</i> -A <sub>2</sub> pm-D-Ala (free tetrapeptide)                               | 3.4 ± 0.59                                              | 8.0 ± 0.92                |
| MurNAc-L-Ala-γ-D-Glu- <i>meso</i> -A <sub>2</sub> pm-D-Ala-D-Ala (pentapeptide)                       | 9.8 ± 1.22                                              | 6.2 ± 0.56                |
| UDP-MurNAc-L-Ala-γ-D-Glu- <i>meso</i> -A <sub>2</sub> pm-D-Ala-D-Ala (pentapeptide)                   | 5.9 ± 0.14                                              | 6.4 ± 0.17                |
| <b>L-Lysine-containing substrates</b>                                                                 |                                                         |                           |
| MurNAc-L-Ala-γ-D-Glu-L-Lys-D-Ala                                                                      | 1.3 ± 0.28                                              | 2.1 ± 0.36                |
| L-Ala-γ-D-Glu-L-Lys-D-Ala                                                                             | 0.7 ± 0.14                                              | 2.1 ± 0.28                |
| UDP-MurNAc-L-Ala-γ-D-Glu-L-Lys-D-Ala-D-Ala                                                            | 1.2 ± 0.26                                              | 1.7 ± 0.20                |
| <b>Others</b>                                                                                         |                                                         |                           |
| GlcNAc-MurNAc-L-Ala-γ-D-Glu- <i>meso</i> -A <sub>2</sub> pm(NH <sub>2</sub> )-D-Ala                   |                                                         | Very low (<0.5)           |
| GlcNAc-MurNAc-L-Ala-γ-D-Glu(NH <sub>2</sub> )- <i>meso</i> -A <sub>2</sub> pm-D-Ala                   |                                                         | Not detected <sup>b</sup> |
| GlcNAc-MurNAc-L-Ala-γ-D-Glu(NH <sub>2</sub> )- <i>meso</i> -A <sub>2</sub> pm(NH <sub>2</sub> )-D-Ala |                                                         | Not detected <sup>b</sup> |
| Peptidoglycan polymer                                                                                 |                                                         | Not detected <sup>b</sup> |

1211

1212 <sup>a</sup> Standard enzyme assay conditions are described in the Materials and Methods. Values represent the mean ± standard deviation of  
 1213 triplicate experiments.

1214 <sup>b</sup> Not detected indicates that no formation of the corresponding disaccharide-tripeptide (HPLC) and/or release of alanine (amino acid  
 1215 analyzer) was detected in the assay conditions used.

1216 **Table 2.** Sensitivity of WT and  $\Delta FTL1678$  to antibiotics, detergents, and dyes

| Compound         | Concentration ( $\mu\text{g}/\text{disk}$ ) | Average zone of inhibition, mm (mean $\pm$ SD) <sup>a</sup> |                  |
|------------------|---------------------------------------------|-------------------------------------------------------------|------------------|
|                  |                                             | WT                                                          | $\Delta FTL1678$ |
| Gentamicin       | 4                                           | 3 $\pm$ 0                                                   | 1 $\pm$ 0 (R)    |
| Tetracycline     | 5                                           | 2 $\pm$ 0                                                   | 1 $\pm$ 0 (R)    |
| Chloramphenicol  | 5                                           | 3 $\pm$ 0                                                   | 1 $\pm$ 0 (R)    |
| Ciprofloxacin    | 5                                           | 5 $\pm$ 0                                                   | 2 $\pm$ 0 (R)    |
| Ampicillin       | 200                                         | 3 $\pm$ 0                                                   | 4 $\pm$ 0 (S)    |
| Vancomycin       | 20                                          | 1 $\pm$ 0                                                   | 3 $\pm$ 0 (S)    |
| Bacitracin       | 182                                         | 1 $\pm$ 0                                                   | 1 $\pm$ 0        |
| Polymyxin B      | 100                                         | 1 $\pm$ 0                                                   | 1 $\pm$ 0        |
| Lysozyme         | 1000                                        | 1 $\pm$ 0                                                   | 2 $\pm$ 0 (S)    |
| Ethidium Bromide | 5                                           | 3 $\pm$ 0                                                   | 1 $\pm$ 0 (R)    |
| Triton-X100      | 750                                         | 3 $\pm$ 0                                                   | 3 $\pm$ 0        |
| SDS              | 1000                                        | 1 $\pm$ 0                                                   | 2 $\pm$ 0 (S)    |
| CTAB             | 50                                          | 1 $\pm$ 0                                                   | 1 $\pm$ 0        |
| CHAPS            | 50                                          | 1 $\pm$ 0                                                   | 1 $\pm$ 0        |

1218 <sup>a</sup> (R) indicates  $\Delta FTL1678$  is significantly more resistant than WT by one-way ANOVA ( $P < 0.05$ )

1220 <sup>a</sup> (S) indicates  $\Delta FTL1678$  is significantly more sensitive than WT by one-way ANOVA ( $P < 0.05$ )

1221 **Figure 1. Amino acid alignment of bacterial L,D-carboxypeptidases.** Clustal Omega amino  
1222 acid alignment of *E. coli* LdcA (BAA36050.1), *P. aeruginosa* LdcA (Q9HTZ1), *N. gonorrhoeae*  
1223 LdcA (YP\_208343.1), *F. tularensis* Type B FTL1678, and *F. tularensis* Type A FTT0101, and  
1224 *C. jejuni* Pgp2 (WP\_002856863). Percent identities (pid), compared to *E. coli* LdcA, are  
1225 indicated. Black shading indicates similar residues. Red shading indicates the catalytic triad.

1226

1227 **Figure 2. FTL1678 is OM-associated.** Spheroplasting, osmotic lysis, and sucrose density  
1228 gradient centrifugation were performed to separate inner membranes (IM) and outer membranes  
1229 (OM) from *F. tularensis*  $\Delta$ FTL1678 *trans*-complemented with a 6×histidine-tagged FTL1678.  
1230 Whole-cell lysates (WCL), OM fractions, and IM fractions were separated by SDS-PAGE,  
1231 transferred to nitrocellulose, and immunoblotting was performed using antisera specific for the  
1232 OM control protein FopA ( $\alpha$ FopA), IM control protein SecY ( $\alpha$ SecY), or histidine-tagged  
1233 FTL1678.

1234

1235 **Figure 3. Deletion of FTL1678 alters bacterial morphology.** Electron micrograph images of:  
1236 (A) Wild-type LVS or (B)  $\Delta$ FTL1678 grown in sMHB to OD<sub>600</sub> of 0.4. Scale bars represent 100  
1237 nm. Representative images shown; (C) Outer membrane [OM] thickness measurements [nm]  
1238 were determined for WT and  $\Delta$ FTL1678, with n=50 bacterial cells analyzed per experimental  
1239 group, multiple width measurements recorded per individual bacterium, and average  
1240 width/bacterium recorded; (D) Cell width measurements [nm] for WT and  $\Delta$ FTL1678, with  
1241 n=175 bacterial cells analyzed per experimental group. \*\*\*\* indicates  $P < 0.0001$ .

1242



1243 **Figure 4. Deletion of *FTL1678* affects sensitivity to envelope stress.** WT and  $\Delta$ *FTL1678*  
1244 were grown in 100 ml sMHB: (A) at 37°C, (B) at 40°C, (C) addition of 60  $\mu$ M CuCl<sub>2</sub>, (D)  
1245 addition of 5 mM H<sub>2</sub>O<sub>2</sub>, (E) addition of 5% NaCl, or (F) pH 5.5. Bacteria were grown in  
1246 triplicate for 24 h and OD<sub>600</sub> measurements were recorded every 4 h. Error bars represent  
1247 standard deviation at each time point.

1248  
1249 **Figure 5.  $\Delta$ *FTL1678* is fully-attenuated in a mouse pulmonary infection model.** (A) Groups  
1250 of 5 C3H/HeN mice were intranasally-infected with 10<sup>5</sup> CFU of either wild-type WT,  
1251  $\Delta$ *FTL1678*, or  $\Delta$ *FTL1678* *trans*-complemented with *FTL1678* [*FTL1678* compl]. Animal health  
1252 was monitored daily through day 21 post-infection. \*\*\*\* indicates  $P < 0.0001$ ; (B) Lungs, livers,  
1253 spleens, and blood were aseptically harvested from mice infected with 10<sup>4</sup> CFU of either WT or  
1254  $\Delta$ *FTL1678* on days 2 and 5 post-infection and plated to enumerate bacterial numbers. \* indicates  
1255  $P < 0.01$ ; (C) Groups of 5 C3H/HeN mice were intranasally-infected with 10<sup>5</sup> CFU of either  
1256 LVS,  $\Delta$ *FTL1678*, *FTL1678* *trans*-complement [*FTL1678* compl], or *C. jejuni* *Pgp2* *trans*-  
1257 complement [*Pgp2* compl]. Animal health was monitored through day 21 post-infection. \*\*  
1258 indicates  $P < 0.01$ .

1259  
1260 **Figure 6. *FTL1678* is required for *F. tularensis* replication in macrophages.** (A) J774A.1  
1261 macrophages or mouse bone marrow-derived macrophages (mBMDMs) were infected with WT  
1262 or  $\Delta$ *FTL1678* at an MOI of 100:1 and bacterial numbers were enumerated at entry (0 h), 6 h, and  
1263 24 h post-infection. (B) Fold change in bacterial numbers from 6 to 24 h post-infection was  
1264 calculated. \* indicates  $P < 0.01$ .

1265  
57

1266 **Figure 7.  $\Delta FTL1678$  protects against fully-virulent Type A *F. tularensis* SchuS4.** (A)  
1267 Groups of 5 C3H/HeN mice were intranasally infected with either  $10^5$  CFU WT or  $10^5$ ,  $10^7$ , or  
1268  $10^9$  CFU  $\Delta FTL1678$ . On day 29 post-infection, mice were boosted with  $10^9$  CFU  $\Delta FTL1678$  and  
1269 animal health was monitored daily through day 50 post-infection. \*\*\*  $P < 0.001$ ; (B) Mice from  
1270 A were intranasally-challenged with 120 CFU of wild-type SchuS4 [BSL3;  $6 \times$  LD50]. Animal  
1271 health was monitored daily through day 26 post-infection. \* indicates  $P < 0.001$ .

1272  
1273 **Figure 8.  $\Delta FTL1678$  does not induce tissue damage.** (A) Hematoxylin and eosin (H&E)-  
1274 stained lungs, livers, and spleens were examined from either uninfected, *F. tularensis* WT LVS-,  
1275 or  $\Delta FTL1678$ -infected mice at 10 $\times$  objective. (B) Tissues were graded on a scale of 0 to 4, with  
1276 4 being the most severe. \* indicates  $P < 0.05$ .

1277  
1278 **Figure 9. Model of *F. tularensis* peptidoglycan synthesis and recycling pathways.**  
1279 Bioinformatic analyses were used to predict proteins that may be involved in peptidoglycan  
1280 synthesis and recycling in *F. tularensis*. *F. tularensis* LVS gene locus tags are indicated, with *E.*  
1281 *coli* or Gram-negative ortholog protein names. OM, outer membrane. IM, inner membrane.  
1282 GlcNAc, *N*-acetylglucosamine. MurNAc, *N*-acetylmuramic acid. Pal, OM-localized  
1283 peptidoglycan-associated lipoprotein. TolB, periplasmic protein that interacts with Pal and  
1284 peptidoglycan. HMM PBP, high molecular weight penicillin binding protein. LMM PBP, low  
1285 molecular weight penicillin binding protein.

1286

1287 **Supporting Information**

1288

1289 **Table S1.** HPLC retention times of peptidoglycan (PG) compounds analyzed in this study

1290

1291 **Table S2.** Endopeptidase activity of FTL1678

1292

1293 **Table S3.** Specific activity of FTL1678, FTL1678 double mutants, and FTL1678 triple mutants

1294 to the TCT monomer

1295

1296 **Table S4.** Bioinformatic analyses of FTL1678 localization

1297

1298 **Table S5.** Sensitivity of WT LVS,  $\Delta$ FTL1678, FTL1678 *trans*-complement, and Pgp2 *trans*-

1299 complement to antibiotics, detergents, and dyes

1300

1301 **Table S6.** Sensitivity of WT *F. tularensis* SchuS4 and  $\Delta$ FTT0101 to antibiotics, detergents, and

1302 dyes

1303

1304 **Table S7.** Bacterial strains and plasmids used in this study

1305

1306 **Table S8.** Primers used in this study

1307

1308

1309 **Figure S1. FTL1678 contains a putative L,D-carboxypeptidase domain.** NCBI Conserved

1310 Domain search results for *F. tularensis* FTL1678.

1311

1312 **Figure S2. Activity of FTL1678 and controls on GlcNAc-anhydroMurNAc-tetrapeptide**

1313 (TCT). (A) Structure of TCT with the LdcA cleavage site indicated (blue arrow). (B) HPLC

1314 analysis of reaction mixtures obtained following incubation of TCT in the presence of either

1315 FTL1678, vector control extract, or buffer alone. The enzymatic assay and HPLC conditions

1316 used are outlined in Materials and Methods.

1317

1318 **Figure S3. Activity of FTL1678 and controls on the free tetrapeptide, L-Ala- $\gamma$ -D-Glu-*meso*-**

1319 **A<sub>2</sub>pm-D-Ala.** HPLC analysis of reaction mixtures obtained following incubation of L-Ala- $\gamma$ -D-

1320 Glu-*meso*-A<sub>2</sub>pm-D-Ala (Tetra) in the presence of buffer alone, extract from the vector control, or

1321 purified FTL1678. A peak of L-Ala- $\gamma$ -D-Glu-*meso*-A<sub>2</sub>pm product (Tri) was only detected in the

1322 presence of FTL1678. FTL1678 enzyme activity was not affected by the presence of either 2.5

1323 mM MgCl<sub>2</sub> or 5 mM EDTA added to the reaction mixtures. The enzymatic assay and HPLC

1324 conditions used are outlined in Materials and Methods.

1325

1326 **Figure S4. *F. tularensis* TolB is OM-localized.** Spheroplasting, osmotic lysis, and sucrose

1327 density gradient centrifugation were performed to separate inner membranes (IM) and outer

1328 membranes (OM) from *F. tularensis*  $\Delta$ FTL1678 *trans*-complemented with a 6 $\times$ histidine-tagged

1329 FTL1678. Whole-cell lysates (WCL), OM fractions, and IM fractions were separated by SDS-

1330 PAGE, transferred to nitrocellulose, and immunoblotting was performed using antisera specific

1331 for the periplasmic protein TolB ( $\alpha$ TolB).

1332

1333 **Figure S5.  $\Delta FTL1678$  does not have a growth defect.** WT and  $\Delta FTL1678$  were grown in  
1334 sMHB for 24 h at 37°C. Samples were taken every 4 h for (A) OD<sub>600</sub> measurements and (B)  
1335 CFU enumeration following serial-dilution and plating.

1336

1337 **Figure S6.  $\Delta FTL1678$  has septation defects.** Transmission electron micrograph images of  
1338  $\Delta FTL1678$  bacteria showing aberrant septal formation and reduced ability to separate cells.  
1339 Images taken at: (A) 49,000 $\times$ , scale bar represents 200 nm; and (B) 6,800 $\times$ , scale bar  
1340 represents 2  $\mu$ m. In (A), red arrows point to formed septa that have not separated in  $\Delta FTL1678$   
1341 bacteria and white arrows point to new septa that are forming in  $\Delta FTL1678$  bacteria.  
1342 Experiments were performed twice to confirm reproducibility, with two bacterial preparations  
1343 fixed, stained, embedded, sectioned, and visualized per experiment. Representative images  
1344 shown.

1345

1346 **Figure S7. *FTL1678* trans-complement and *C. jejuni* Pgp2 trans-complement restore *F.***  
1347 ***tularensis* phenotype.** Transmission electron micrograph images of: (A)  $\Delta FTL1678$  trans-  
1348 complemented with *FTL1678* [FTL1678 compl] or (B)  $\Delta FTL1678$  trans-complemented with *C.*  
1349 *jejuni* *pgp2* [Pgp2 compl]. Bacteria were grown in sMHB to OD<sub>600</sub> of 0.4. Scale bars represent  
1350 100 nm. (C) Outer membrane thickness [WT n=50;  $\Delta FTL1678$  n=50; FTL1678 compl n=44;  
1351 Pgp2 compl n=33] and (D) cell width [WT n=119;  $\Delta FTL1678$  n=120; FTL1678 compl n=119;  
1352 Pgp2 compl n=119] of FTL1678 compl and Pgp2 compl were compared to WT LVS and  
1353  $\Delta FTL1678$ . \*\*\*\* indicates  $P < 0.0001$ .

1354

1355 **Figure S8. *FTL1678* trans-complement and *C. jejuni* Pgp2 trans-complement exhibit**  
1356 **similar phenotypes to stressors as WT *F. tularensis*.** WT LVS [WT],  $\Delta FTL1678$ ,  $\Delta FTL1678$   
1357 *trans*-complemented with *FTL1678* [FTL1678 compl], or  $\Delta FTL1678$  *trans*-complemented with  
1358 *C. jejuni* *pgp2* [Pgp2 compl] were grown in either: (A) sMHB; (B) sMHB with 5 mM H<sub>2</sub>O<sub>2</sub>; (C)  
1359 sMHB with 5% NaCl; or (D) sMHB at pH 5.5. Cultures were incubated for 24 h and OD<sub>600</sub>  
1360 measurements were recorded every 4 h.

1361  
1362 **Figure S9. FTT0101 is not required for *F. tularensis* Type A strain SchuS4 virulence.**  
1363 C3H/HeN mice were intranasally infected with either 80 CFU SchuS4 (n=3 mice) or 12 CFU  
1364  $\Delta FTT0101$  (n=5 mice).

1365  
1366 **Figure S10. Individual amino acids of the LdcA catalytic triad are not essential for *F.***  
1367 ***tularensis* virulence.** Groups of 5 C3H/HeN mice were intranasally-infected with 10<sup>5</sup> CFU of  
1368 either *F. tularensis* WT LVS,  $\Delta FTL1678$ ,  $\Delta FTL1678$  *trans*-complemented with FTL1678  
1369 (FTL1678 compl),  $\Delta FTL1678$  *trans*-complemented with S134A (S134A),  $\Delta FTL1678$  *trans*-  
1370 complemented with E239A (E239A), or  $\Delta FTL1678$  *trans*-complemented with H308A (H308A).  
1371 Animal health was monitored daily through day 21 post-infection. \*\*  $P < 0.01$ .

pid 1 80

*Ec* LdcA 100.0% -----MSLFHLIAPS GYCIKQHAALRC  
*Pa* LdcA 23.0% -----MISRPPSSDQTWQPIDGRVALIAPASATAIDVLEAT  
*Ng* LdcA 30.3% MTEPTSRRRFLKCTAAGAGLLQACGTSATSVPPLPSSHVVVKARIVPLQTPRRQSSDGNLLRVVASSGFAEDTNRVNTA  
FTL1678 17.6% -----MLLKNNYLVSIIILVVLIMIVTKSFACAATDYNKVALINVS-TOYYPNDIKQA  
FTT0101 17.6% -----MLLKNNYLVSIIILVVLIMIVTKSFACAATDYNKVALINVS-TOYYPNDIKQA  
*Cj* Pgp2 6.3% -----MLKRLALLITLSSIMLHASDLVKIYLINQGLDAVGVATIEKELTQKD

pid 81 160

*Ec* LdcA 100.0% IQRLTDAGHQVNNVEVIARRCERFACTETERLEEDINSLAR-LITTPNTIVLAVRGGYG---ASRLIADIDWQALVARQOH  
*Pa* LdcA 23.0% LRQLEVHGVVDYHLGRHVEARVRYLAGTVEQRLEDLHNAFD--MPDIITAVWCRLRGGYG---CGQLLEGLDWGRILQAASPR  
*Ng* LdcA 30.3% ITRLVNAGETVVTNQAGSRRFORFAGTDAQRADFQEVASGRVATPKVIMGLRGGYG---AARILPHIDFASLGARVRE  
FTL1678 17.6% EKALKDYGNTT-YKYLDIYPSDFGYSNPDSIRAKILLDALLDKNIDIWFLKGGGG---AFNLLPML-YDHIINELKKA  
FTT0101 17.6% EKALKDYGNTT-YKYLDIYPSDFGYSNPDSIRAKILLDALLDKNIDIWFLKGGGG---AFNLLPML-YDHIINELKKA  
*Cj* Pgp2 6.3% FWLSEIGDKNISLGYDDNVAIVLTNKTDKILLRVVSYEDGKIRKDFEQQEITIGLMDGDKKIEGDLRTEVGFVIELGRKFNP

pid 161 240

*Ec* LdcA 100.0% DEPLLICGHSDFDTATOCGLLAHGNVITFSGPMIVANFGADELNAFTEHHEFWLALRNETFTTIEWQ-----GEGPTC  
*Pa* LdcA 23.0% P--LIGFSDISVLLSAFHRHGLPAIHGVPVATGLGLSPISAPREQQERIASLASVSRILAGIDHELP----VQHLGGHKQ  
*Ng* LdcA 30.3% HGTLFFGFSDVCAVOLALAKGNMMSFAGPMAYSDFGKPAAGFAFTMDAFIKGATQNRILTVDVVPY-----IQRADV  
FTL1678 17.6% KPKILVGFSDVTAHFFVNVNLGWKSLHGVVAAYNKNAYSQKIEKIRINDLERIPNITEIINNGISYDKLMPMNMKMAYN  
FTT0101 17.6% KPKILVGFSDVTAHFFVNVNLGWKSLHGVVAAYNKNAYSQKIEKIRINDLERIPNITEIINNGISYDKLMPMNMKMAYN  
*Cj* Pgp2 6.3% GDPYYGPEFAFATTYPNLLDKVQCKTGGGIWIHGYPIDGSRLEDEFKTRGCIALFNNN-----LEKFAOV

pid 241 320

*Ec* LdcA 100.0% RAEGTLWGGNLA MLI SLIGTP-WMPKTE NGILVLEDINEHFFRVERMLLQOLYHAGILPRKAIILGSEFSGSGTP-NDYDAG  
*Pa* LdcA 23.0% RVEGALIGGNLTALACMAGTLGGLHAFAGSILVLEDVGEPEYRLERSLWOLLESIDARQLCAICLGSFTDCPR---KEVA  
*Ng* LdcA 30.3% ETEGTLWGGNLSVLASLAGTP-YMPDIDGGILFLEDVGEQFYRIERMLNTLYLSGILGKORAIIVGDFRMEKIRDLYDSS  
FTL1678 17.6% GTDGSIVGGNMTLIYSYFSTV-YQODISTKILFLEDTGISERQLDRSLHQLLYLPENKKPEAIIFGQFYPLDP--TDDQR  
FTT0101 17.6% GTDGSIVGGNMTLIYSYFSTV-YQODISTKILFLEDTGISERQLDRSLHQLLYLPENKKPEAIIFGQFYPLDP--TDDQR  
*Cj* Pgp2 6.3% VQDKKVEVMTEKPKIRAKKQIASLADLFTWKLAWTNSDTNTYLSFYDEQEFKRFDMKFEQEFASMKKSI FSRKEDKK

pid 321 400

*Ec* LdcA 100.0% YNLESYAEFLRSRLSIPLITGLDFGHEQRTVTLPLGAHA-ILNNTREGTQLTISCHPVLKM-----  
*Pa* LdcA 23.0% HSLEIRIFGEYAAAETEVP LYHHLPSGHGAONRAWPYGKTAVLEGNRLRW-----  
*Ng* LdcA 30.3% YDFSVAKHISRTAKIPVLTGFPFGHLDKITEFLGAHTRIRMNGNCGYSVAFEGYPTLDASALTLDTLLPPDLPIFPE  
FTL1678 17.6% LIYKTVIKKFAKTENRPVYVEPFIHGQYKNKPLLLGVTSNIKCSKETIFCTLKOK-----  
FTT0101 17.6% LIYKTVIKKFAKTENRPVYVEPFIHGQYKNKPLLLGVTSNIKCSKETIFCTLKOK-----  
*Cj* Pgp2 6.3% IKFSDINISPYENLENETMYRISFYEDVYTKNYCFRGDKILYVKIDSKGKMKILAEQ-----

pid 401 408

*Ec* LdcA 100.0% -----  
*Pa* LdcA 23.0% -----  
*Ng* LdcA 30.3% SGVADISE  
FTL1678 17.6% -----  
FTT0101 17.6% -----  
*Cj* Pgp2 6.3% -----

$\alpha$ FopA

WCL    OM    IM

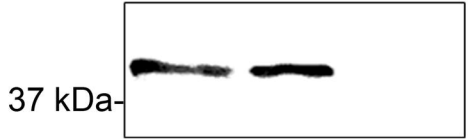

$\alpha$ SecY

WCL    OM    IM

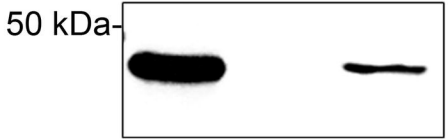

FTL1678

WCL    OM    IM

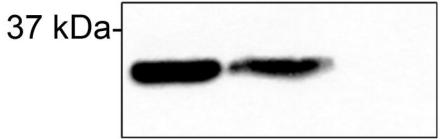



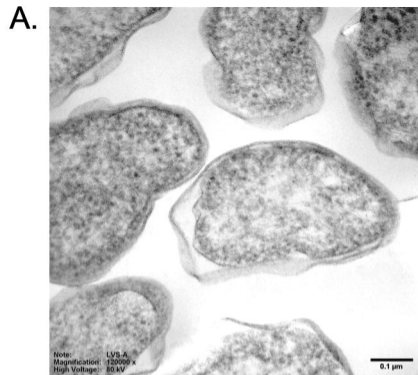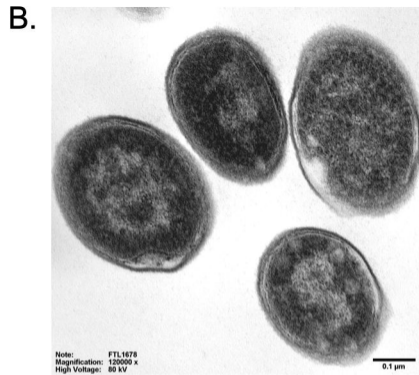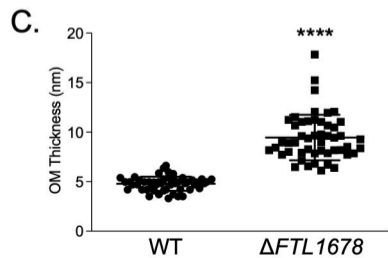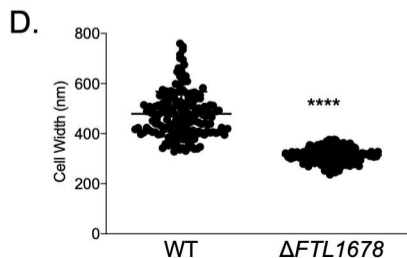

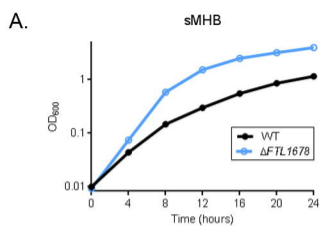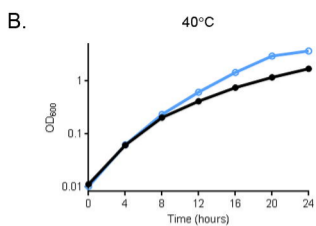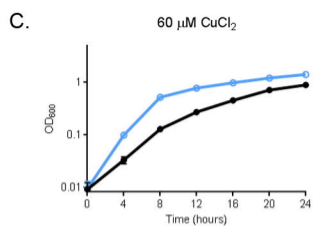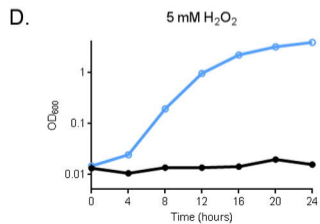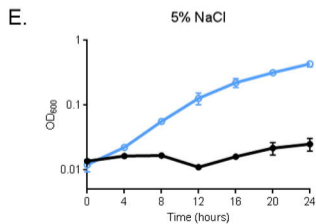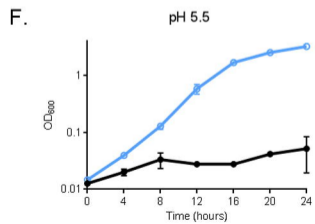

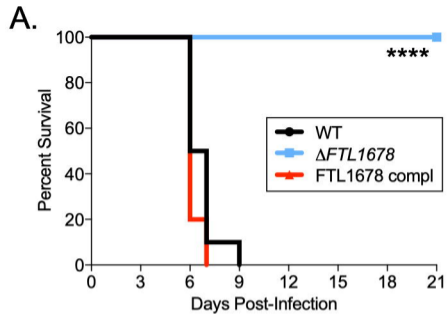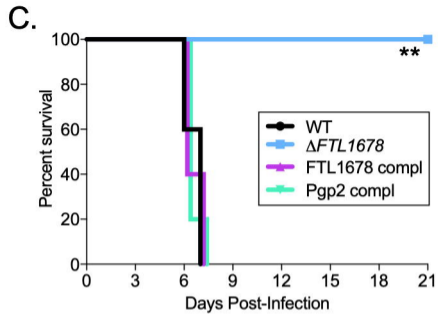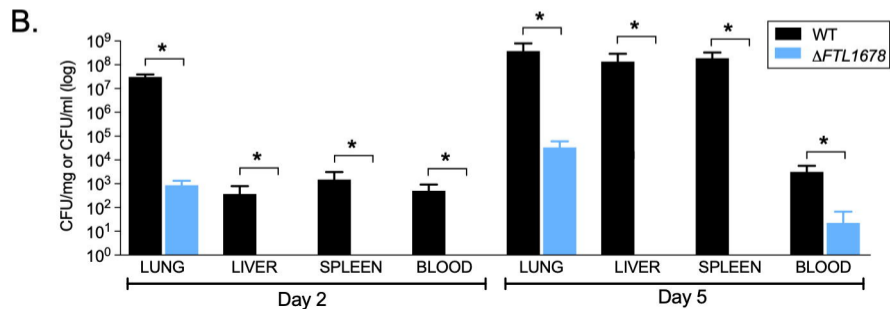

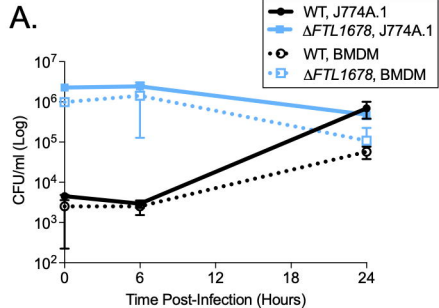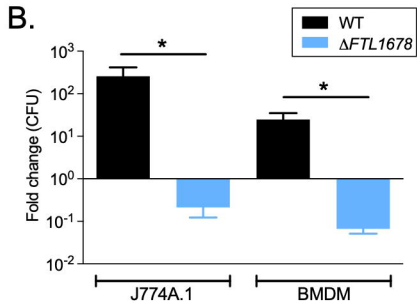

**A.**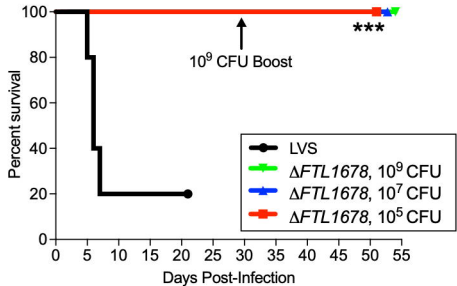**B.**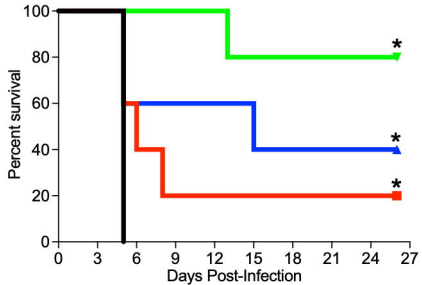

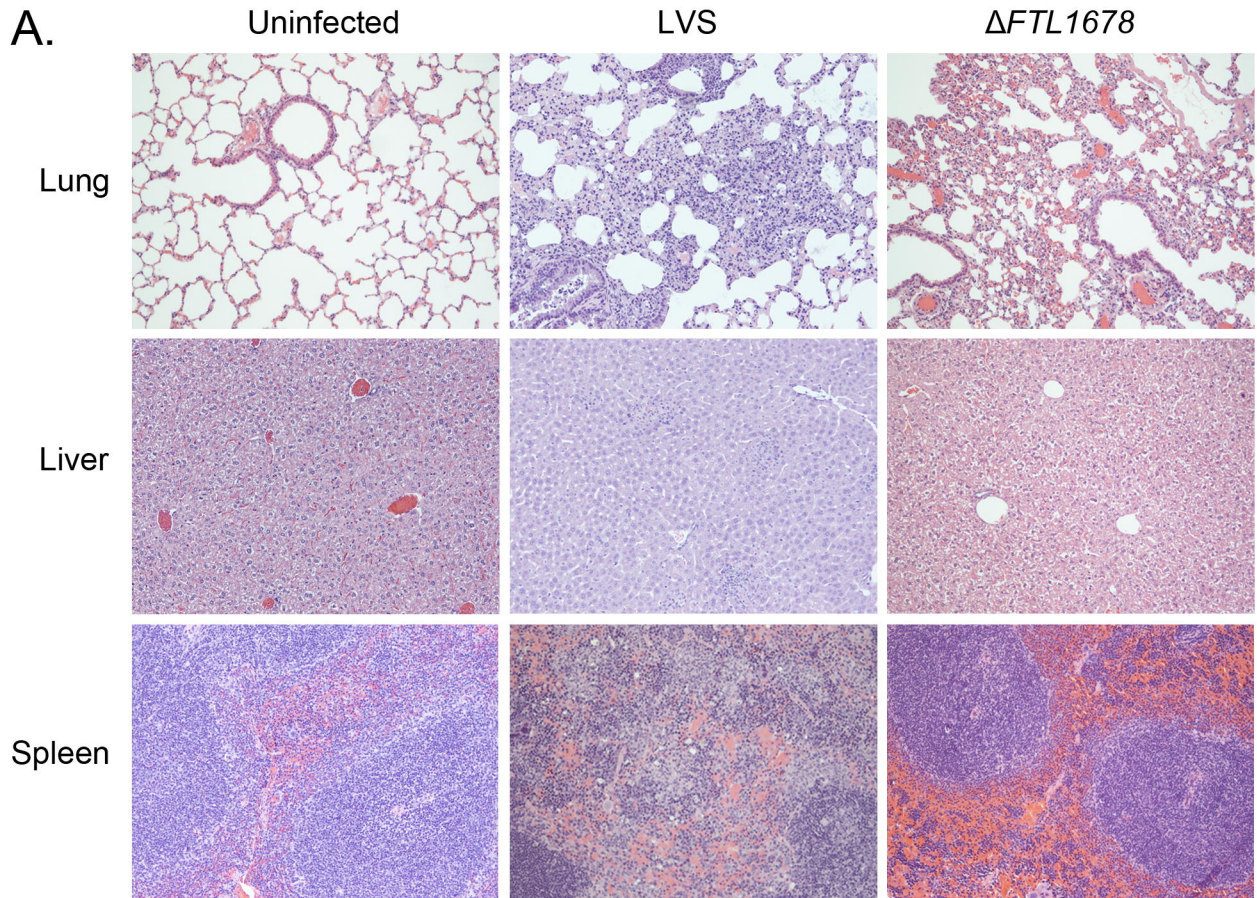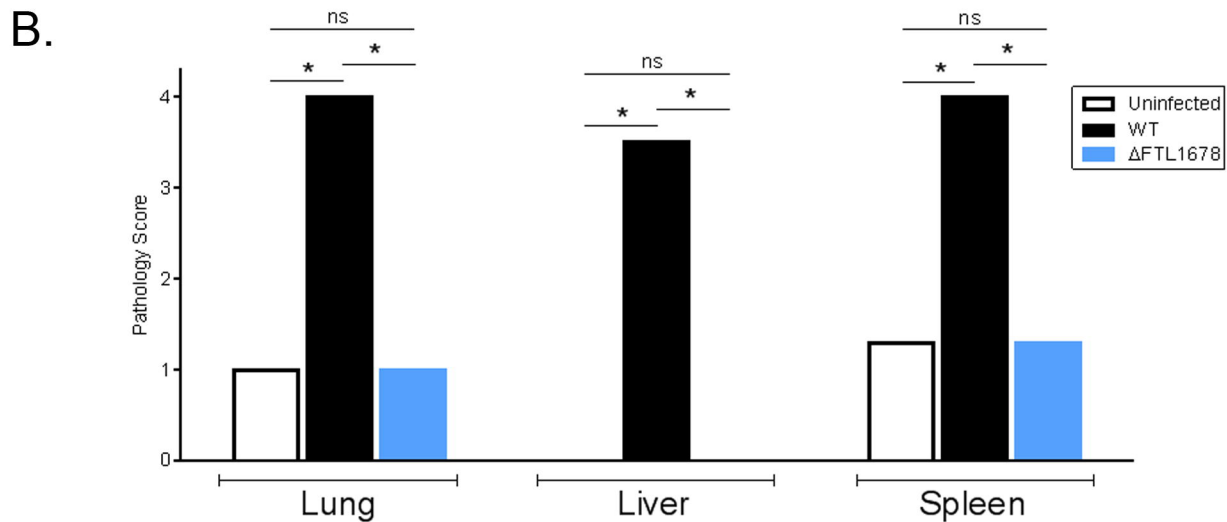

Source: https://www.biorxiv.org/content/10.1101/817593v3.full.pdf
